# Supplementary material for: Design, synthesis, biological evaluation and molecular docking study of novel pyridoxine–triazoles as anti-Alzheimer's agents
Source: PubMed Central journal article supplement — RSC Adv. 2020 Jul 9;10(44):26006–21. doi: 10.1039/d0ra04942e (PMC9055346; doi:10.1039/d0ra04942e), 2020-07-09

## Design, Synthesis, Biological Evaluation and Molecular Docking study of novel Pyridoxine-Triazoles as Anti-Alzheimer's Agents

Tiyas Pal<sup>1</sup>, Saipriyanka Bhimaneni<sup>2</sup>, Abha Sharma<sup>1\*</sup> and S.J.S. Flora<sup>2\*</sup>

<sup>1</sup>Department of Medicinal Chemistry and <sup>2</sup>Pharmacology & Toxicology  
National Institute of Pharmaceutical Education and Research, Raebareli, India

\*E-mail: [abha.sharma@niperraebareli.edu.in](mailto:abha.sharma@niperraebareli.edu.in); [sjsflora@hotmail.com](mailto:sjsflora@hotmail.com)

### SPECTRAL DATA OF **5a**

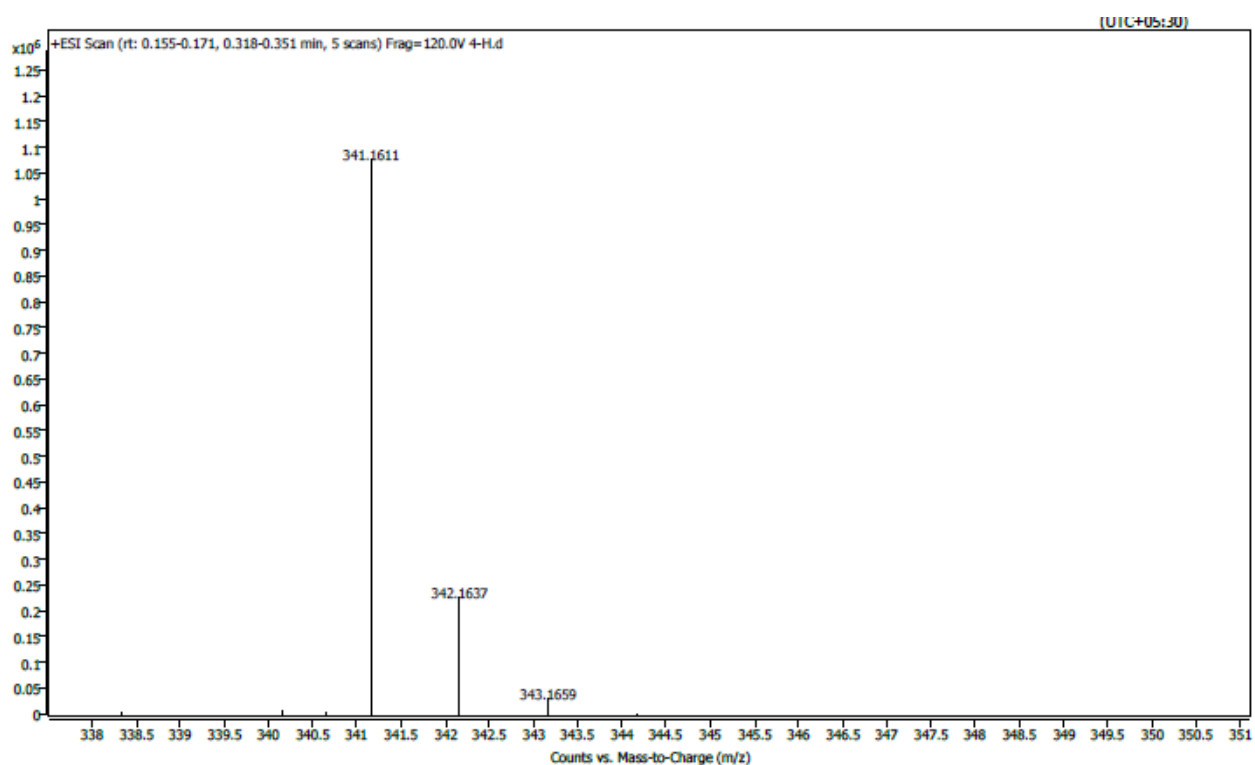

HRMS Spectrum of **5a**

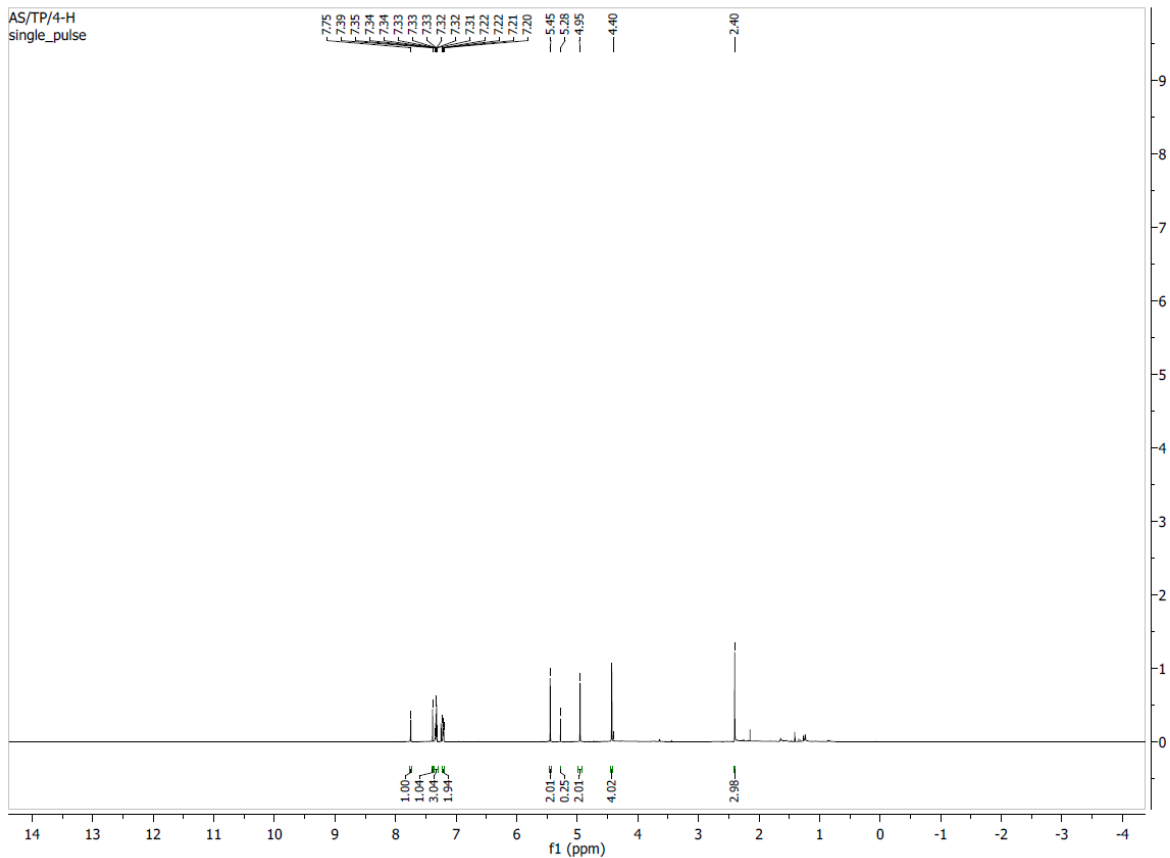

$^1\text{H}$  NMR of 5a in  $\text{CDCl}_3$  at 500MHz

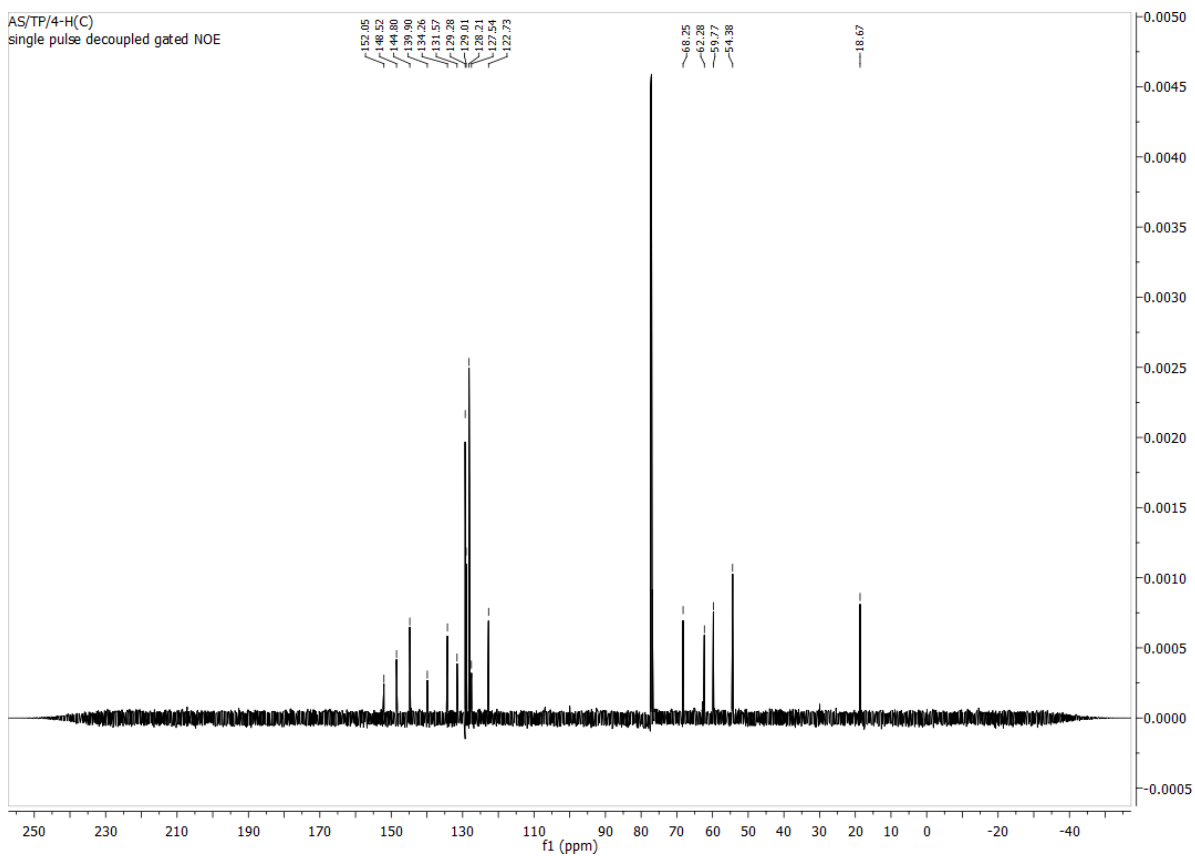

$^{13}\text{C}$  NMR of 5a in  $\text{CDCl}_3$  at 125MHz

HPLC Purity Data of **5a**

```

=====
Acq. Operator   : SYSTEM                      Seq. Line :    6
Sample Operator : SYSTEM
Acq. Instrument : HPLC                      Location  : P2-C-03
Injection Date  : 17-03-2020 16:32:24       Inj       :    1
                                           Inj Volume: 10.000 µl
Acq. Method    : E:\Chemstation\1\Data\TIYAS_RPT 2020-03-17 14-08-34\TIYAS_RPT.M
Last changed   : 17-03-2020 10:01:12 by SYSTEM
Analysis Method: E:\Chemstation\1\Methods\AshimaFA_C-18_PREP.M
Last changed   : 23-06-2020 11:45:48 by SYSTEM
                (modified after loading)
Additional Info : Peak(s) manually integrated
=====
  
```

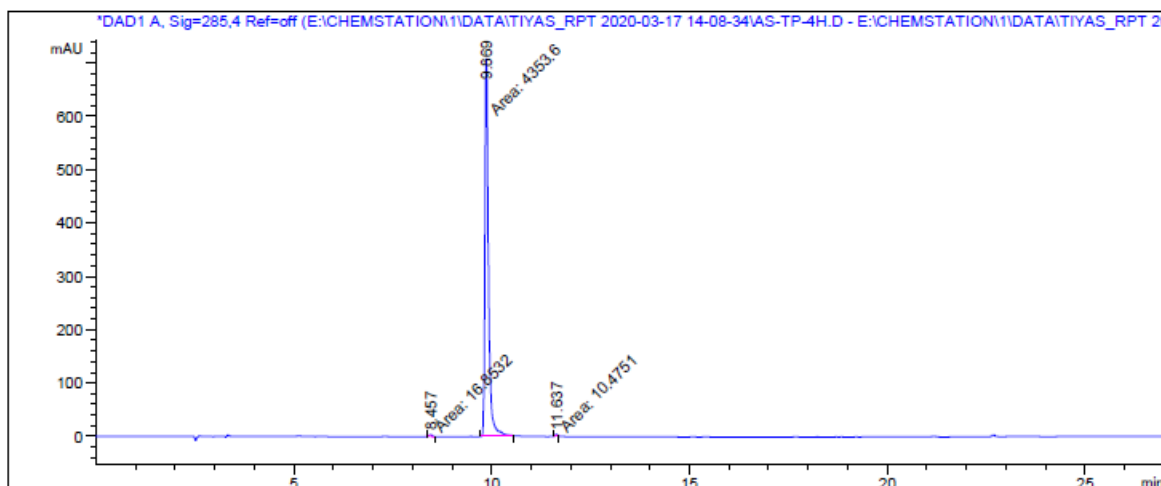

| Peak # | RetTime [min] | Type | Width [min] | Area [mAU*s] | Height [mAU] | Area %  |
|--------|---------------|------|-------------|--------------|--------------|---------|
| 1      | 8.457         | MM   | 0.0991      | 16.85318     | 2.83489      | 0.3847  |
| 2      | 9.869         | MM   | 0.1025      | 4353.60010   | 708.14874    | 99.3762 |
| 3      | 11.637        | MM   | 0.0613      | 10.47512     | 2.84878      | 0.2391  |

SPECTRAL DATA OF **5b**

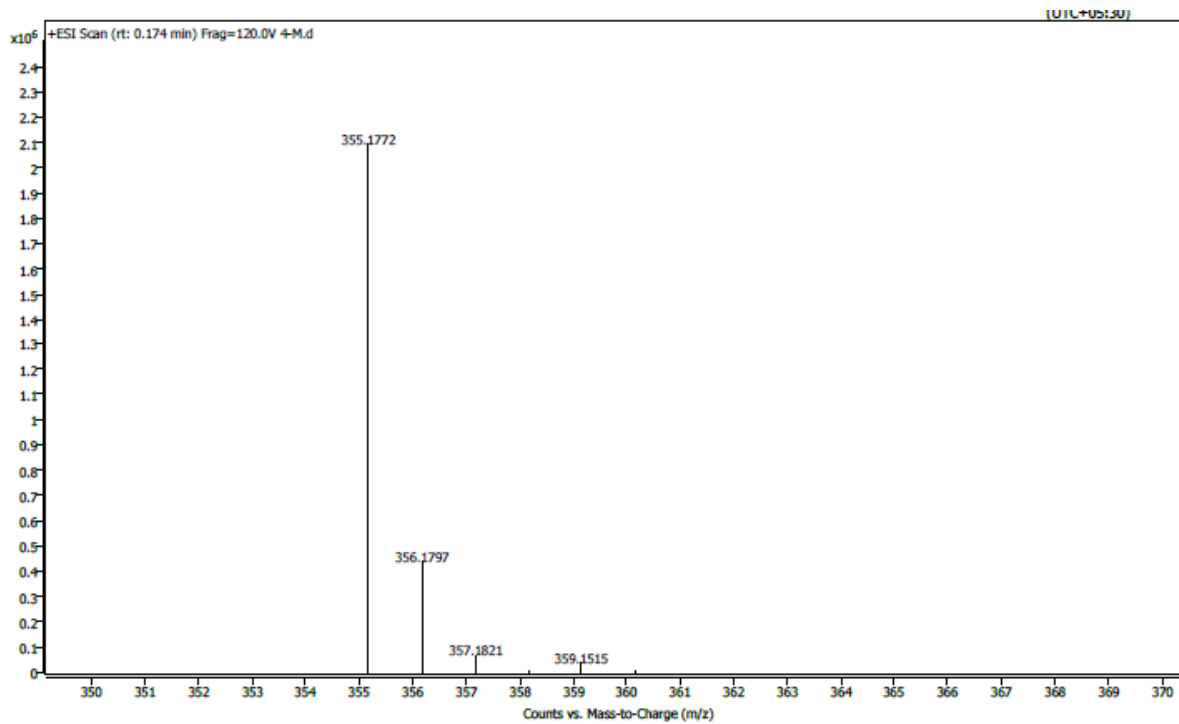

HRMS Spectrum of **5b**

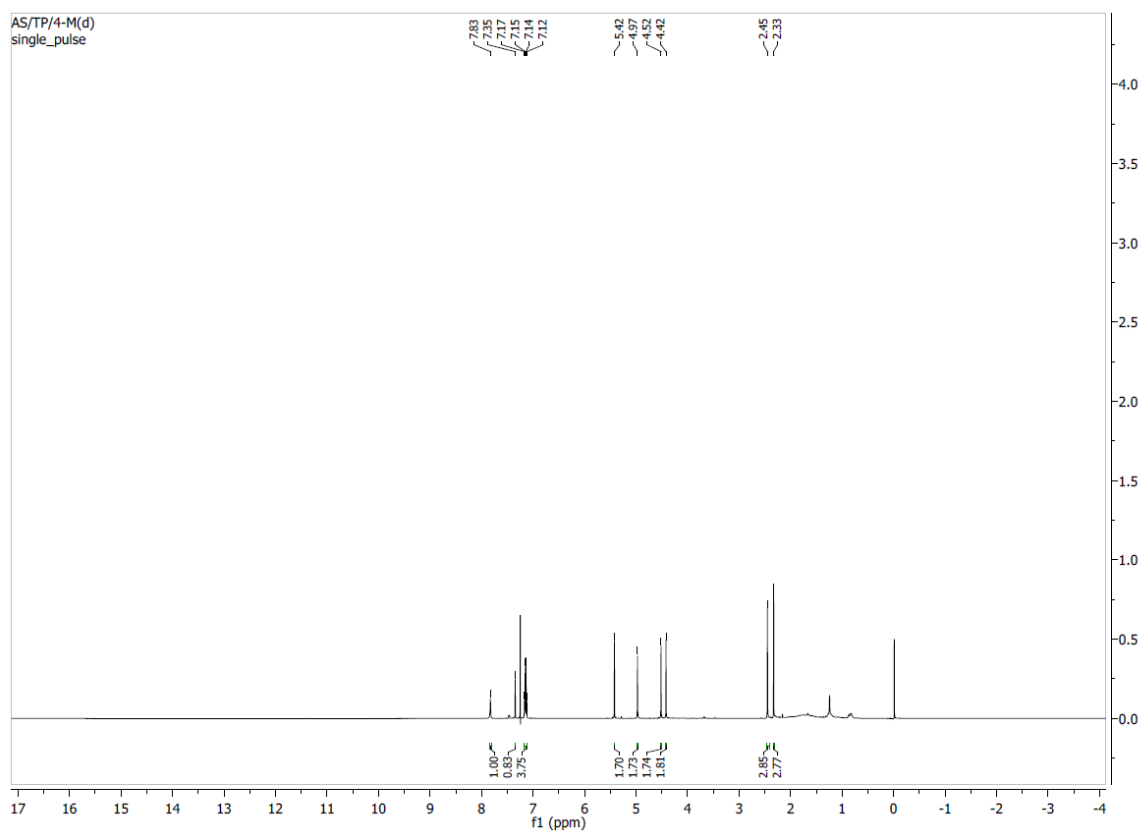

<sup>1</sup>H NMR of **5b** in CDCl<sub>3</sub> at 500MHz

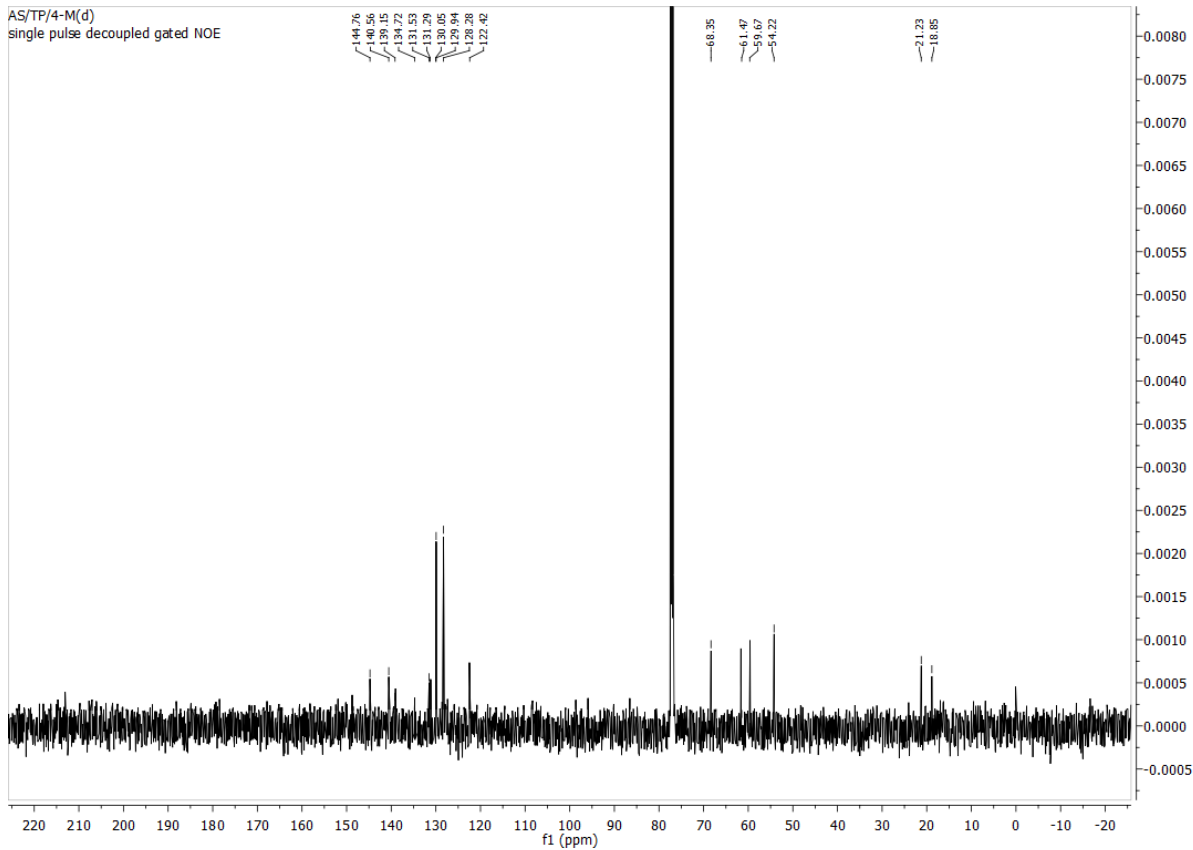

<sup>13</sup>C NMR of **5b** in CDCl<sub>3</sub> at 125MHz

## HPLC Purity data of **5b**

Acq. Operator : SYSTEM Seq. Line : 1  
 Sample Operator : SYSTEM  
 Acq. Instrument : HPLC Location : P2-D-05  
 Injection Date : 12-03-2020 14:37:54 Inj : 1  
 Inj Volume : 10.000 µl  
 Different Inj Volume from Sample Entry! Actual Inj Volume : 20.000 µl  
 Acq. Method : E:\Chemstation\1\Data\SAMPLE\_WA 2020-03-12 14-36-25\TIYAS\_RPT.M  
 Last changed : 12-03-2020 14:21:08 by SYSTEM  
 Analysis Method : E:\CHEMSTATION\1\METHODS\WASH\_AA\_61\_Min.M  
 Last changed : 18-03-2020 10:06:13 by SYSTEM

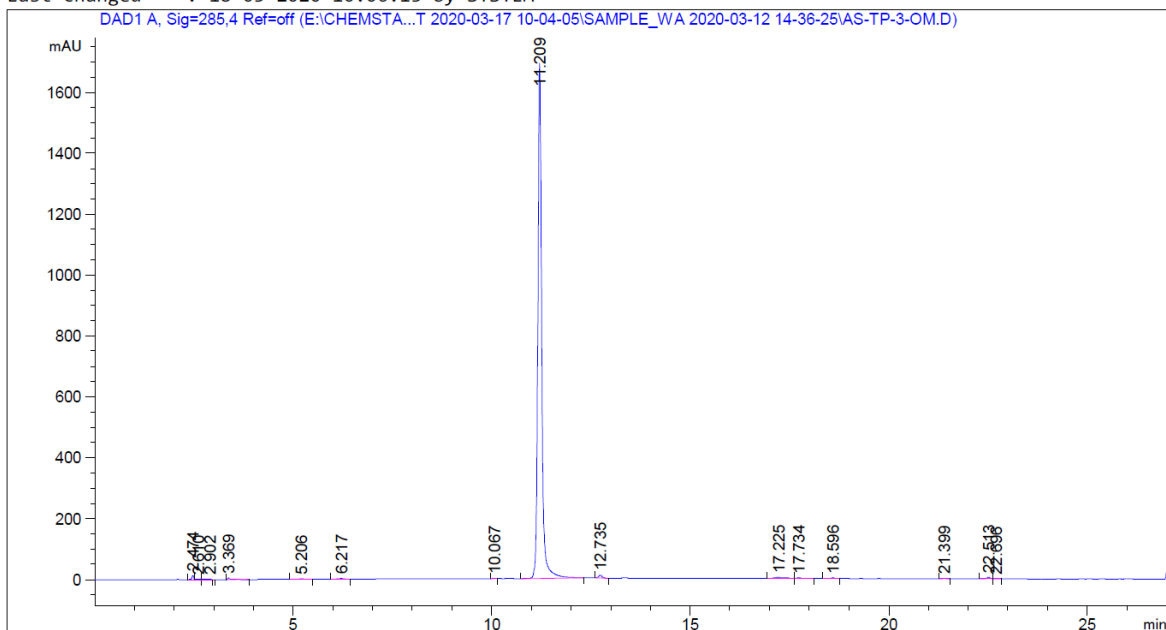

| Peak # | RetTime [min] | Type | Width [min] | Area [mAU*s] | Height [mAU] | Area %  |
|--------|---------------|------|-------------|--------------|--------------|---------|
| 1      | 2.474         | BV R | 0.0466      | 36.14810     | 12.93615     | 0.3074  |
| 2      | 2.610         | VV E | 0.0899      | 9.49463      | 1.49859      | 0.0807  |
| 3      | 2.902         | VV E | 0.1211      | 13.31856     | 1.45118      | 0.1133  |
| 4      | 3.369         | BB   | 0.0606      | 21.35286     | 5.34617      | 0.1816  |
| 5      | 5.206         | BB   | 0.1491      | 10.74166     | 1.05181      | 0.0913  |
| 6      | 6.217         | BB   | 0.1094      | 14.74261     | 1.92288      | 0.1254  |
| 7      | 10.067        | BB   | 0.0787      | 5.77354      | 1.14801      | 0.0491  |
| 8      | 11.209        | BB   | 0.1008      | 1.14519e4    | 1695.04688   | 97.3894 |
| 9      | 12.735        | BB   | 0.0927      | 58.90446     | 9.72381      | 0.5009  |
| 10     | 17.225        | BV   | 0.2962      | 59.28908     | 2.88012      | 0.5042  |
| 11     | 17.734        | VB   | 0.1228      | 17.43097     | 1.97860      | 0.1482  |
| 12     | 18.596        | BB   | 0.1025      | 14.70604     | 2.13127      | 0.1251  |
| 13     | 21.399        | BB   | 0.1002      | 8.52652      | 1.30474      | 0.0725  |
| 14     | 22.513        | BV   | 0.0890      | 29.51746     | 5.14132      | 0.2510  |
| 15     | 22.696        | VV   | 0.1000      | 7.03197      | 1.05244      | 0.0598  |

Totals : 1.17589e4 1744.61395

### SPECTRAL DATA OF 5c

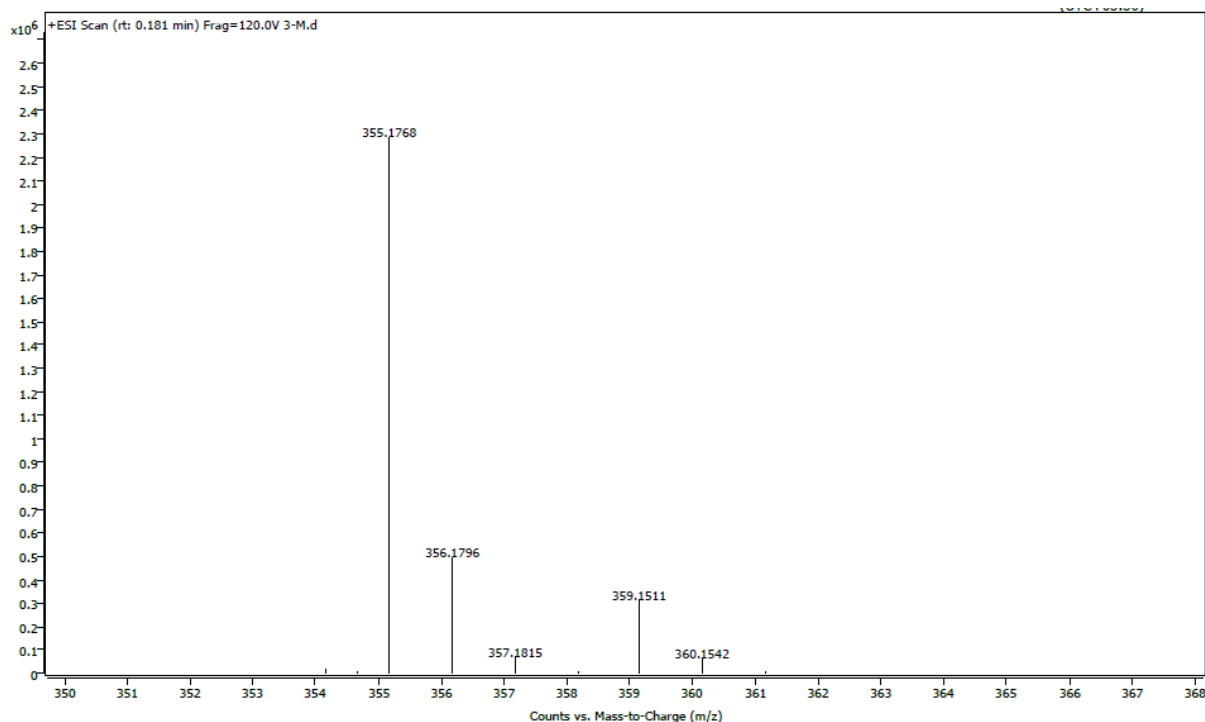

HRMS Spectrum of 5c

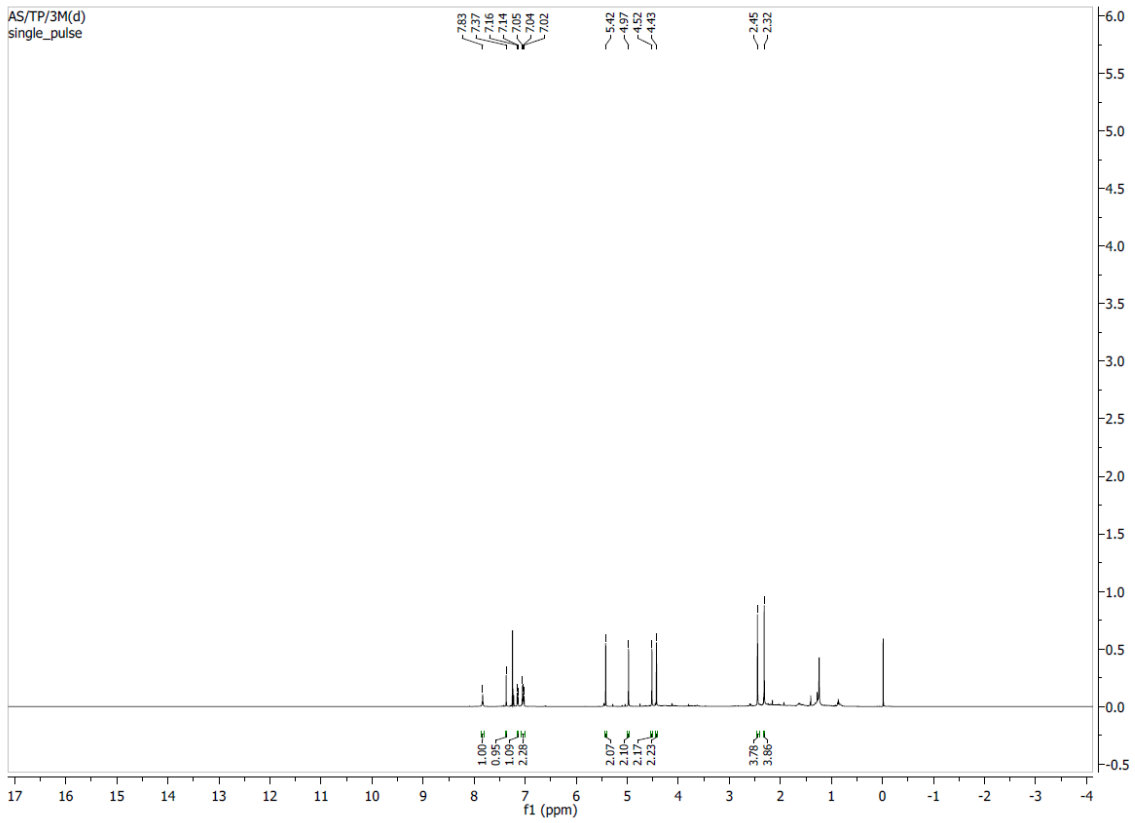

$^1\text{H}$  NMR of **5c** in  $\text{CDCl}_3$  at 500MHz

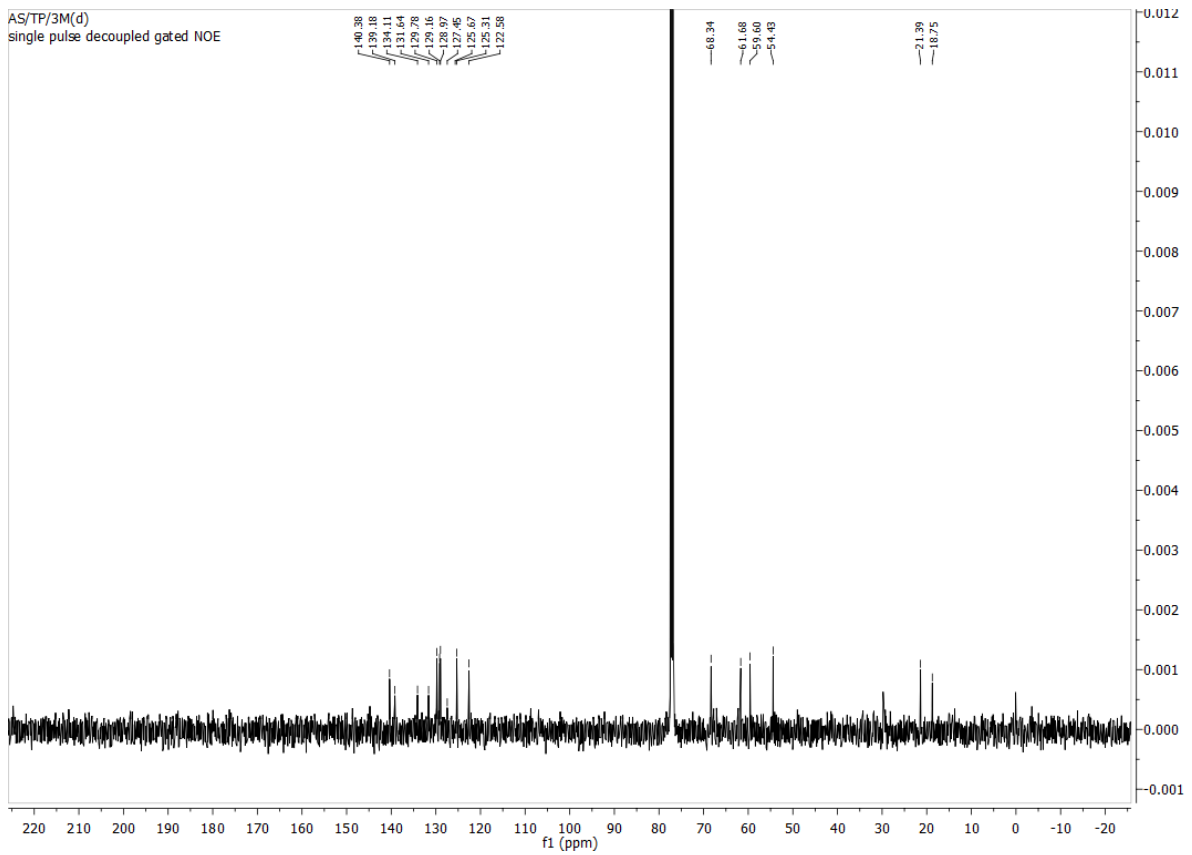

$^{13}\text{C}$  NMR of **5c** in  $\text{CDCl}_3$  at 125MHz

HPLC purity of **5c**

Acq. Operator : SYSTEM  
 Sample Operator : SYSTEM  
 Acq. Instrument : HPLC  
 Injection Date : 17-03-2020 11:02:21  
 Seq. Line : 3  
 Location : P2-B-03  
 Inj : 1  
 Inj Volume : 10.000 µl  
 Acq. Method : E:\Chemstation\1\Data\TIYAS\_RPT 2020-03-17 10-04-05\TIYAS\_RPT.M  
 Last changed : 17-03-2020 10:01:12 by SYSTEM  
 Analysis Method : E:\CHEMSTATION\1\METHODS\WASH\_AA\_61\_Min.M  
 Last changed : 18-03-2020 10:06:13 by SYSTEM  
 Additional Info : Peak(s) manually integrated

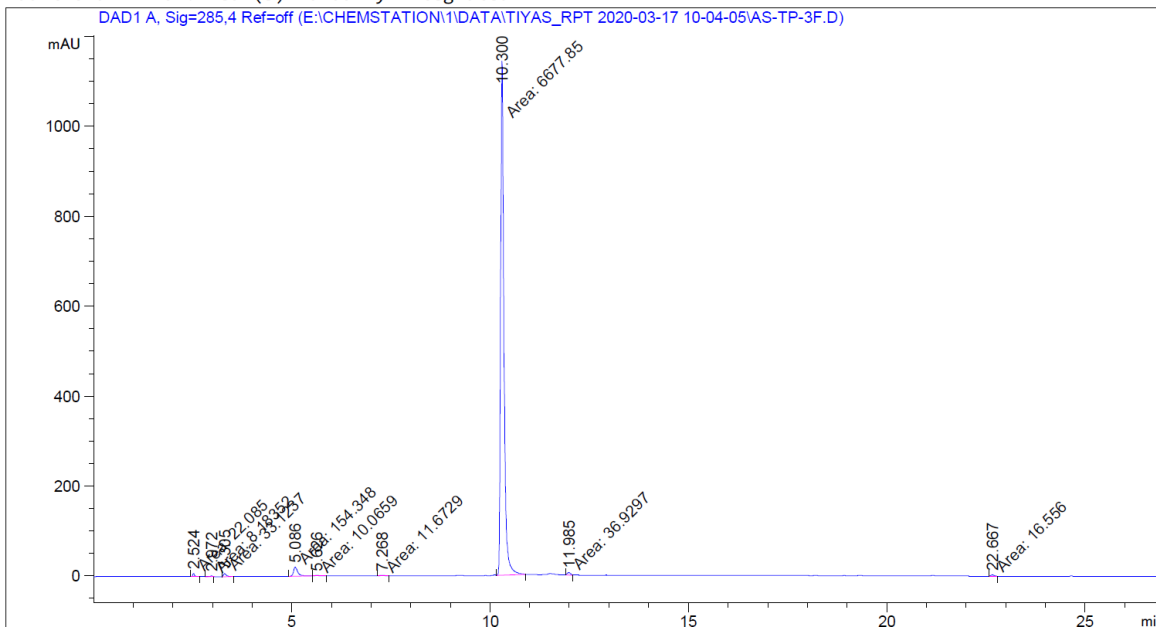

| Peak # | RetTime [min] | Type | Width [min] | Area [mAU*s] | Height [mAU] | Area %  |
|--------|---------------|------|-------------|--------------|--------------|---------|
| 1      | 2.524         | MM   | 0.0525      | 22.08498     | 7.01564      | 0.3168  |
| 2      | 2.972         | MM   | 0.1079      | 8.18352      | 1.26425      | 0.1174  |
| 3      | 3.305         | MM   | 0.0755      | 33.12366     | 7.30831      | 0.4752  |
| 4      | 5.086         | MM   | 0.1269      | 154.34805    | 20.27901     | 2.2142  |
| 5      | 5.626         | MM   | 0.1555      | 10.06588     | 1.07914      | 0.1444  |
| 6      | 7.268         | MM   | 0.1465      | 11.67288     | 1.32804      | 0.1675  |
| 7      | 10.300        | MM   | 0.0971      | 6677.85449   | 1145.75696   | 95.7973 |
| 8      | 11.985        | MM   | 0.0984      | 36.92974     | 6.25713      | 0.5298  |
| 9      | 22.667        | MM   | 0.0944      | 16.55604     | 2.92175      | 0.2375  |

Totals : 6970.81925 1193.21024



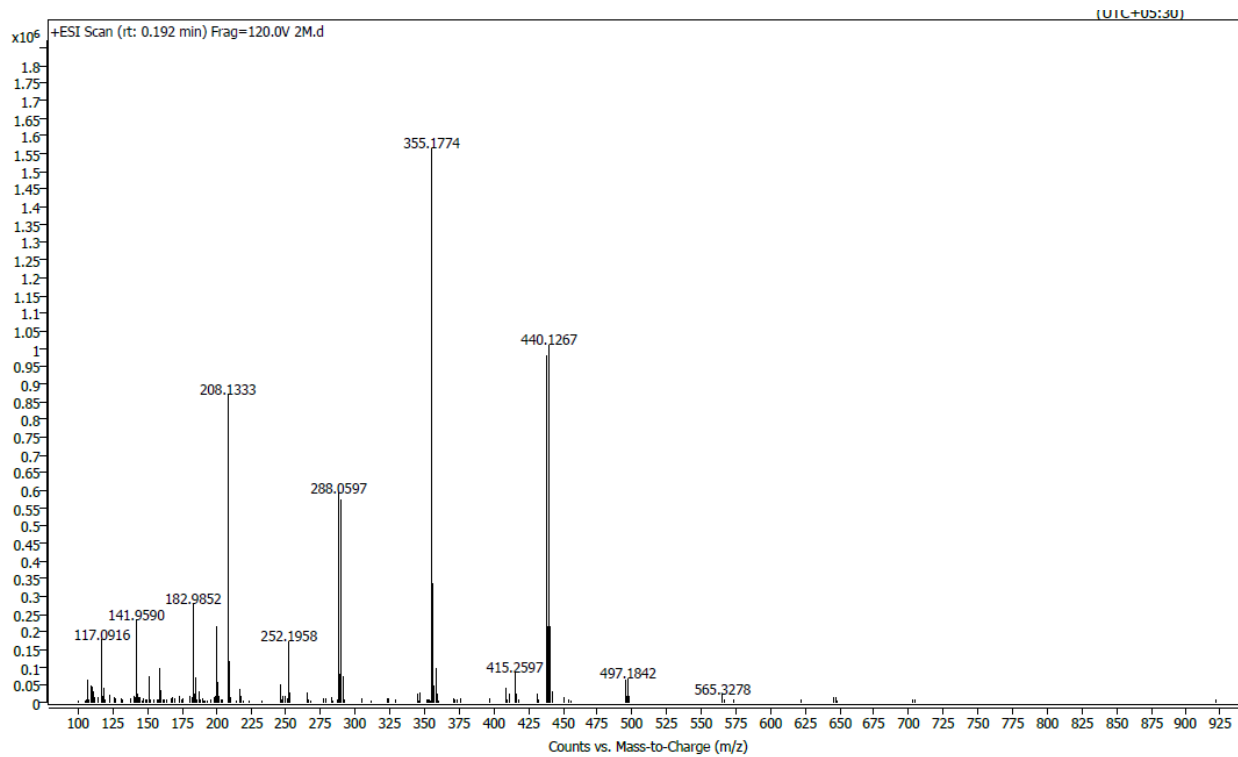

HRMS Spectrum of **5d**

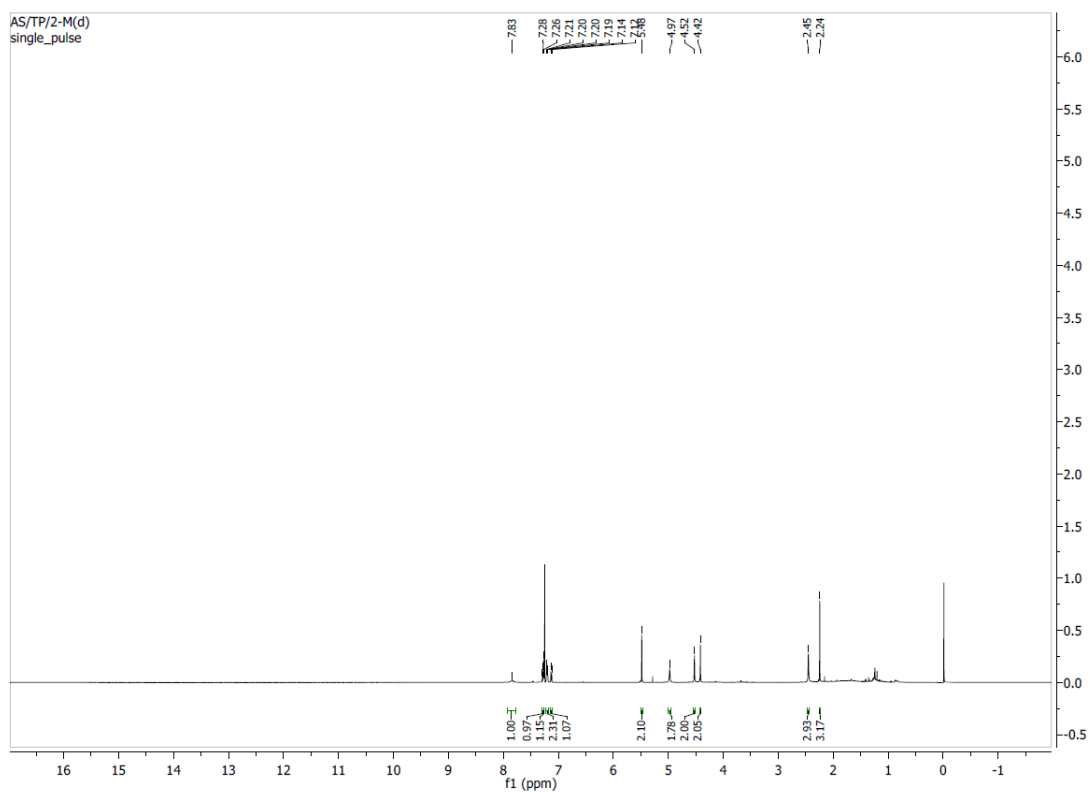

<sup>1</sup>H NMR of **5d** in CDCl<sub>3</sub> at 500MHz

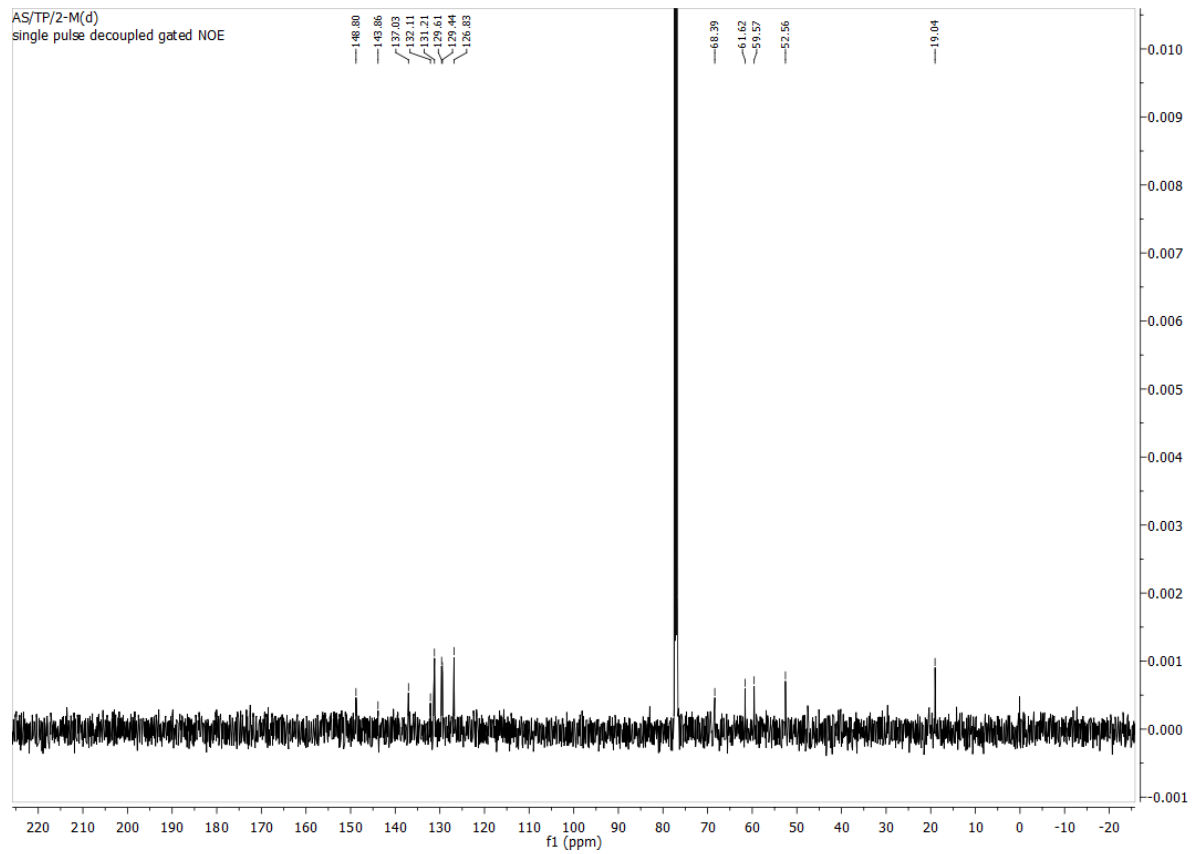

$^{13}\text{C}$  NMR of **5d** in  $\text{CDCl}_3$  at 125MHz

HPLC Purity data of **5d**

Acq. Operator : SYSTEM  
Sample Operator : SYSTEM  
Acq. Instrument : HPLC  
Injection Date : 17-03-2020 13:24:49  
Seq. Line : 8  
Location : P2-B-08  
Inj : 1  
Inj Volume : 10.000 µl  
Acq. Method : E:\Chemstation\1\Data\TIYAS\_RPT 2020-03-17 10-04-05\TIYAS\_RPT.M  
Last changed : 17-03-2020 10:01:12 by SYSTEM  
Analysis Method : E:\CHEMSTATION\1\METHODS\WASH\_AA\_61\_Min.M  
Last changed : 18-03-2020 10:06:13 by SYSTEM  
Additional Info : Peak(s) manually integrated

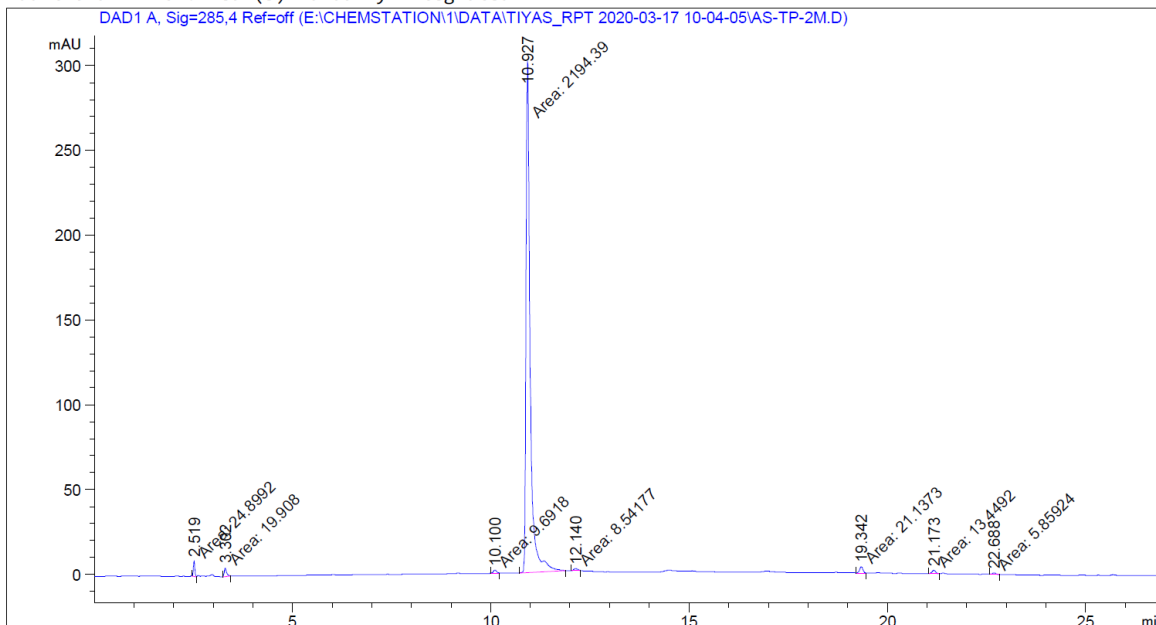

| Peak # | RetTime [min] | Type | Width [min] | Area [mAU*s] | Height [mAU] | Area %  |
|--------|---------------|------|-------------|--------------|--------------|---------|
| 1      | 2.519         | MM   | 0.0466      | 24.89920     | 8.89867      | 1.0836  |
| 2      | 3.302         | MM   | 0.0655      | 19.90803     | 5.06209      | 0.8664  |
| 3      | 10.100        | MM   | 0.0891      | 9.69180      | 1.81386      | 0.4218  |
| 4      | 10.927        | MM   | 0.1210      | 2194.39136   | 302.31458    | 95.4964 |
| 5      | 12.140        | MM   | 0.1177      | 8.54177      | 1.20907      | 0.3717  |
| 6      | 19.342        | MM   | 0.0962      | 21.13725     | 3.66172      | 0.9199  |
| 7      | 21.173        | MM   | 0.1084      | 13.44915     | 2.06748      | 0.5853  |
| 8      | 22.688        | MM   | 0.1025      | 5.85924      | 9.52977e-1   | 0.2550  |

Totals : 2297.87780 325.98045

# Spectral Data of 5e

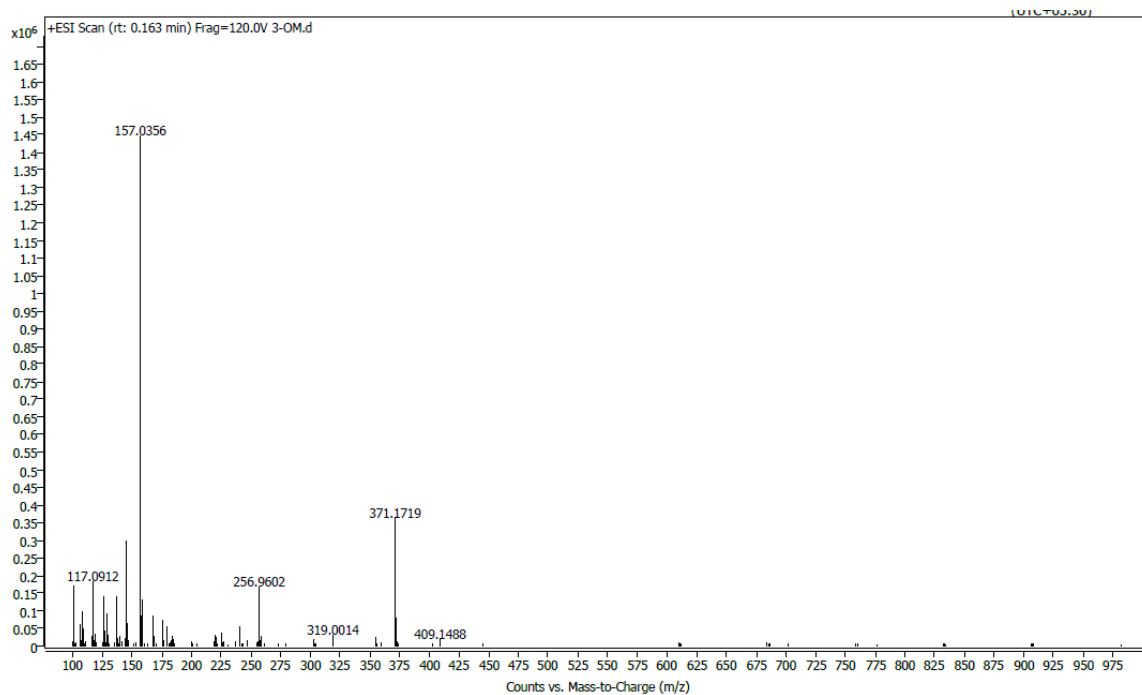

## HRMS Spectrum of 5e

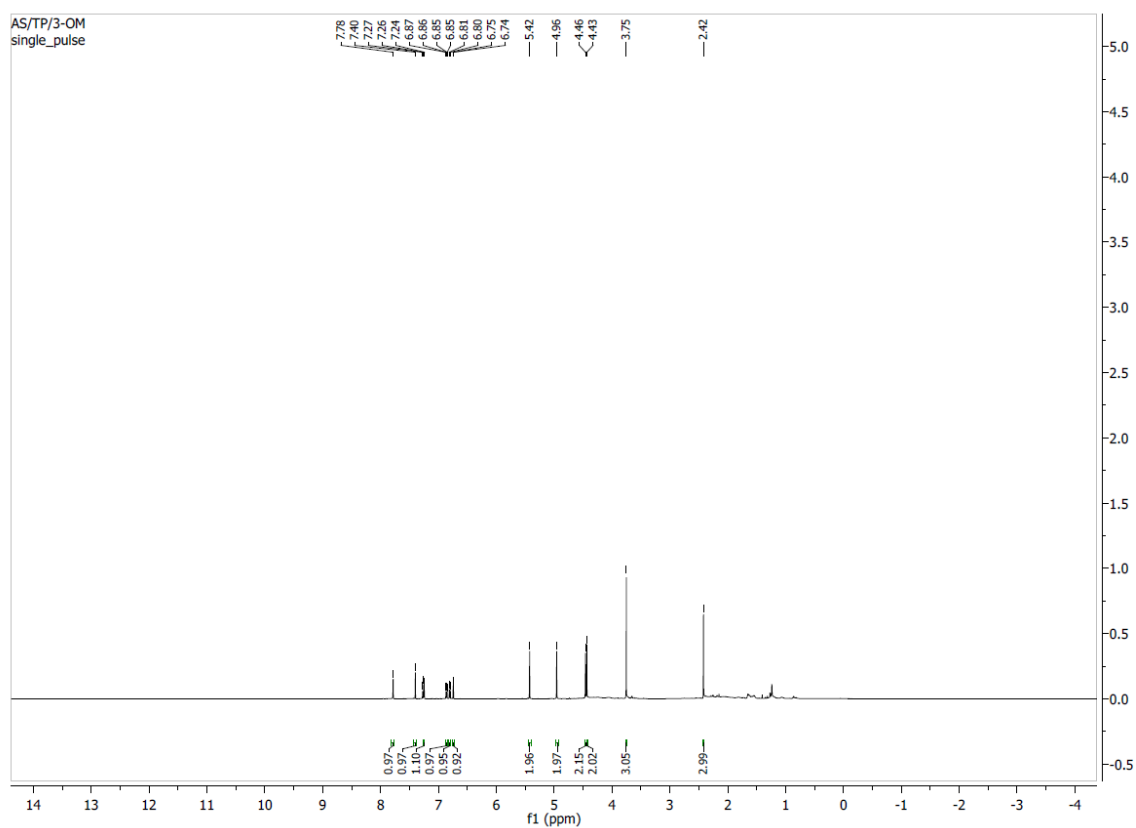

<sup>1</sup>H NMR of 5e in CDCl<sub>3</sub> at 500MHz

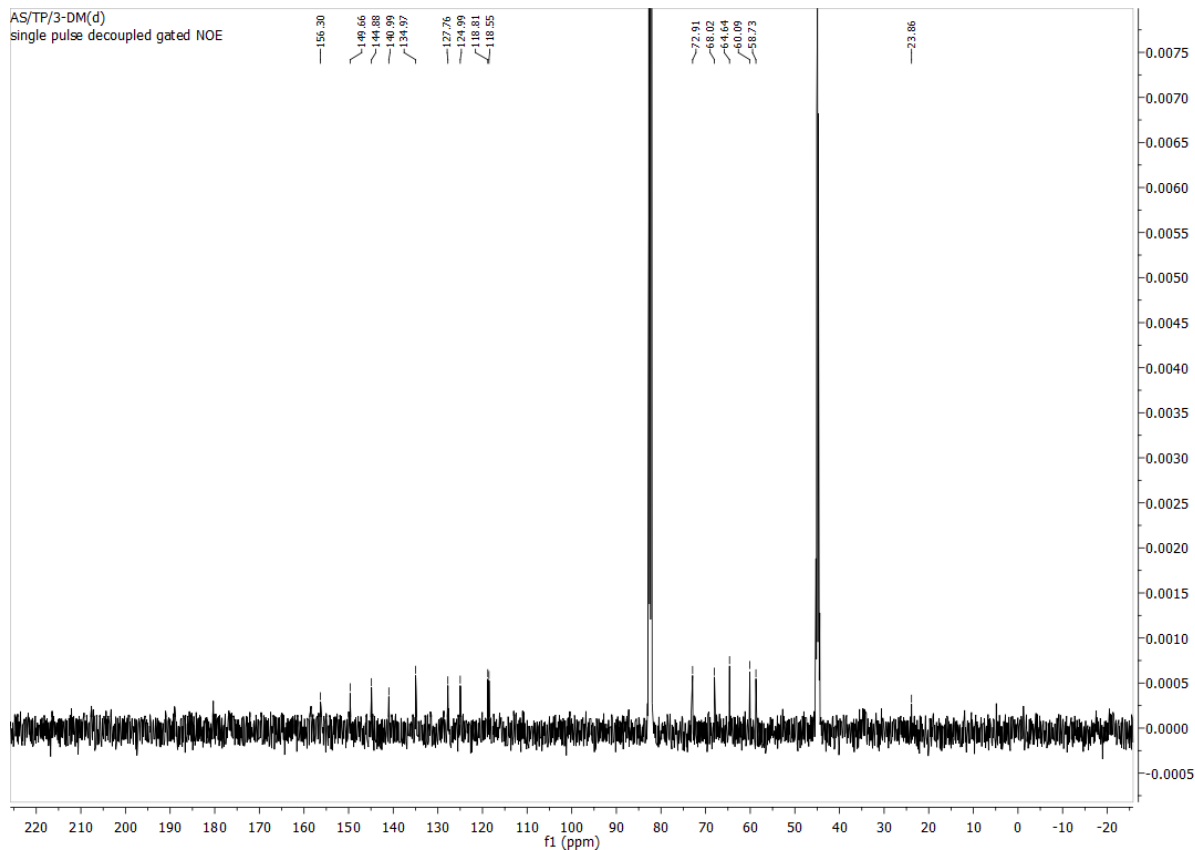

$^{13}\text{C}$  NMR of **5e** in  $\text{CDCl}_3$  and  $\text{DMSO}-d_6$  at 125MHz

## HPLC Purity of **5e**

Data File E:\CHEMSTATION\1\DATA\TIYAS\_RPT 2020-03-17 14-08-34\AS-TP-30M.D

Sample Name: AS-TP-30M

```

=====
Acq. Operator   : SYSTEM                      Seq. Line :    5
Sample Operator : SYSTEM
Acq. Instrument : HPLC                       Location  : P2-C-02
Injection Date  : 17-03-2020 16:03:55         Inj       :    1
                                                Inj Volume: 10.000 µl

Acq. Method    : E:\Chemstation\1\Data\TIYAS_RPT 2020-03-17 14-08-34\TIYAS_RPT.M
Last changed   : 17-03-2020 10:01:12 by SYSTEM
Analysis Method : E:\Chemstation\1\Methods\AshimaFA_C-18_PREP.M
Last changed   : 23-06-2020 11:45:48 by SYSTEM
                (modified after loading)
Additional Info : Peak(s) manually integrated
=====

```

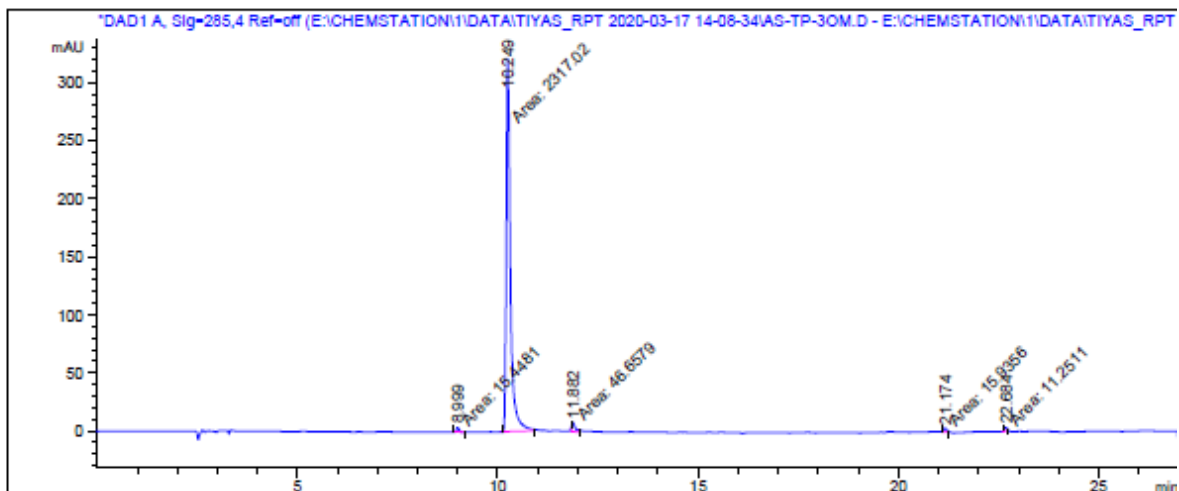

| Peak # | RetTime [min] | Type | Width [min] | Area [mAU*s] | Height [mAU] | Area %  |
|--------|---------------|------|-------------|--------------|--------------|---------|
| 1      | 8.999         | MM   | 0.0765      | 15.44812     | 3.36473      | 0.6420  |
| 2      | 10.249        | MM   | 0.1201      | 2317.02490   | 321.51514    | 96.2892 |
| 3      | 11.882        | MM   | 0.1023      | 46.65788     | 7.60121      | 1.9390  |
| 4      | 21.174        | MM   | 0.0863      | 15.93561     | 3.07669      | 0.6622  |
| 5      | 22.684        | MM   | 0.0660      | 11.25109     | 2.83984      | 0.4676  |

## SPECTRAL DATA OF 5f

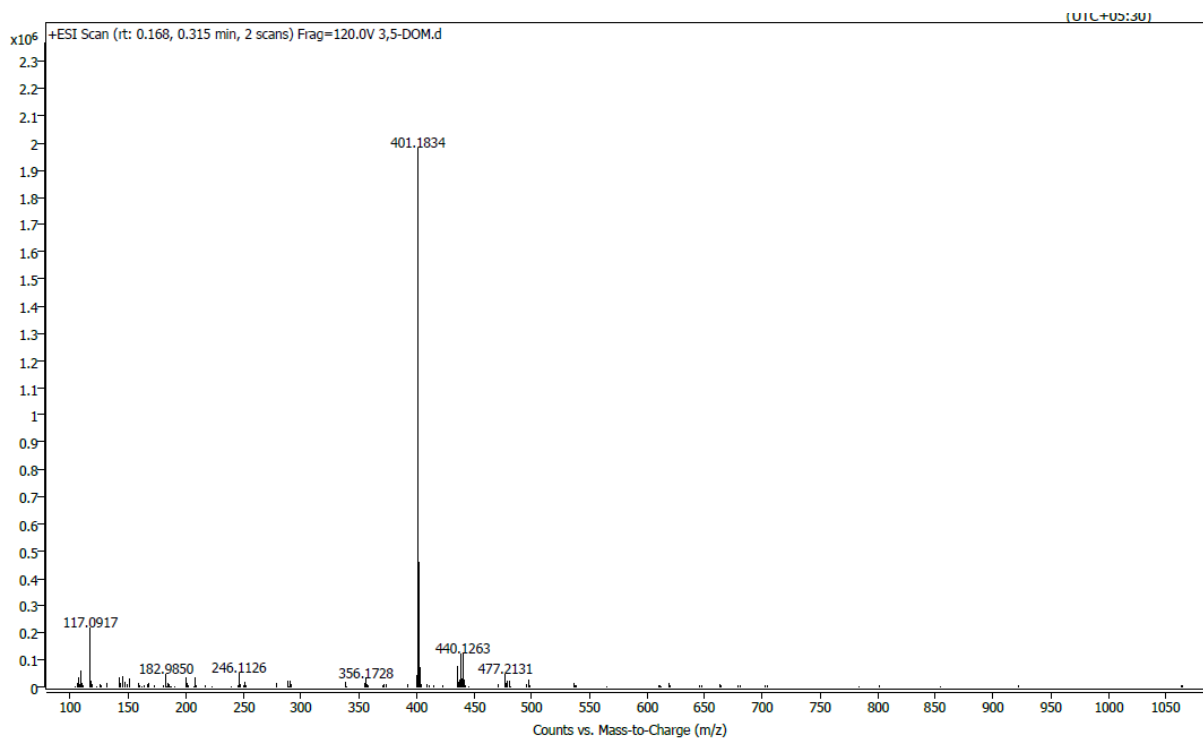

HRMS Spectrum of 5f

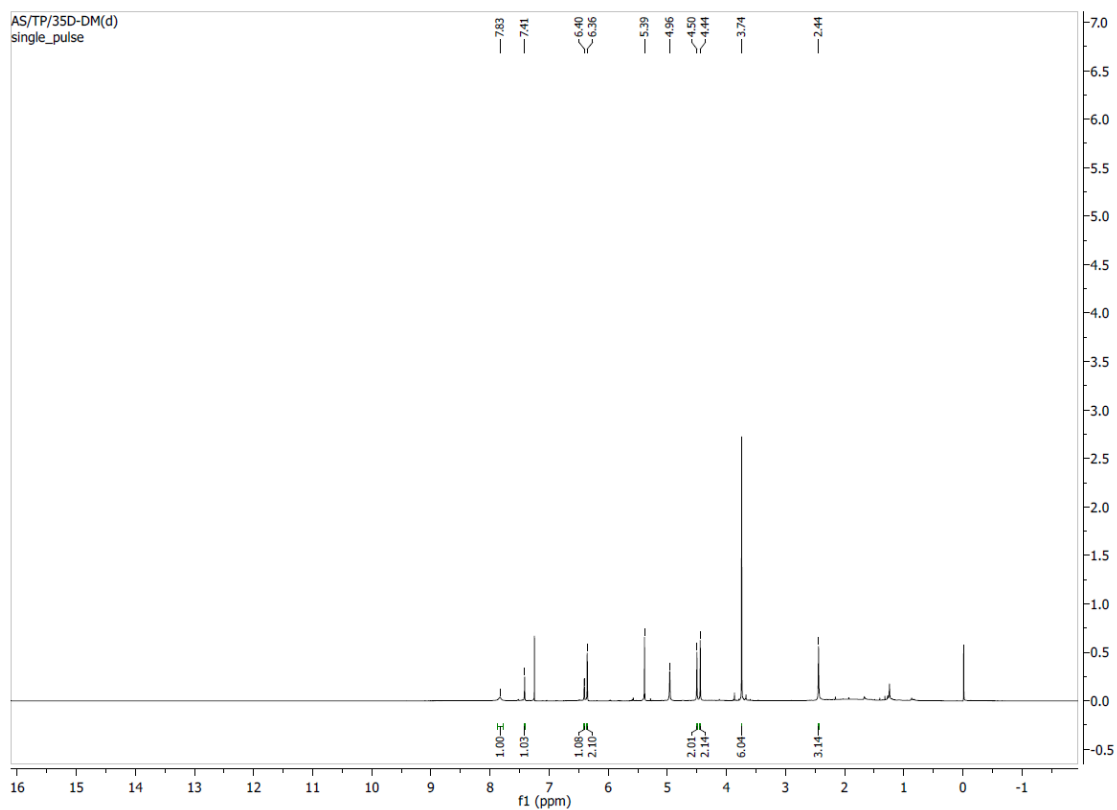

$^1\text{H}$  NMR of **5f** in  $\text{CDCl}_3$  at 500MHz

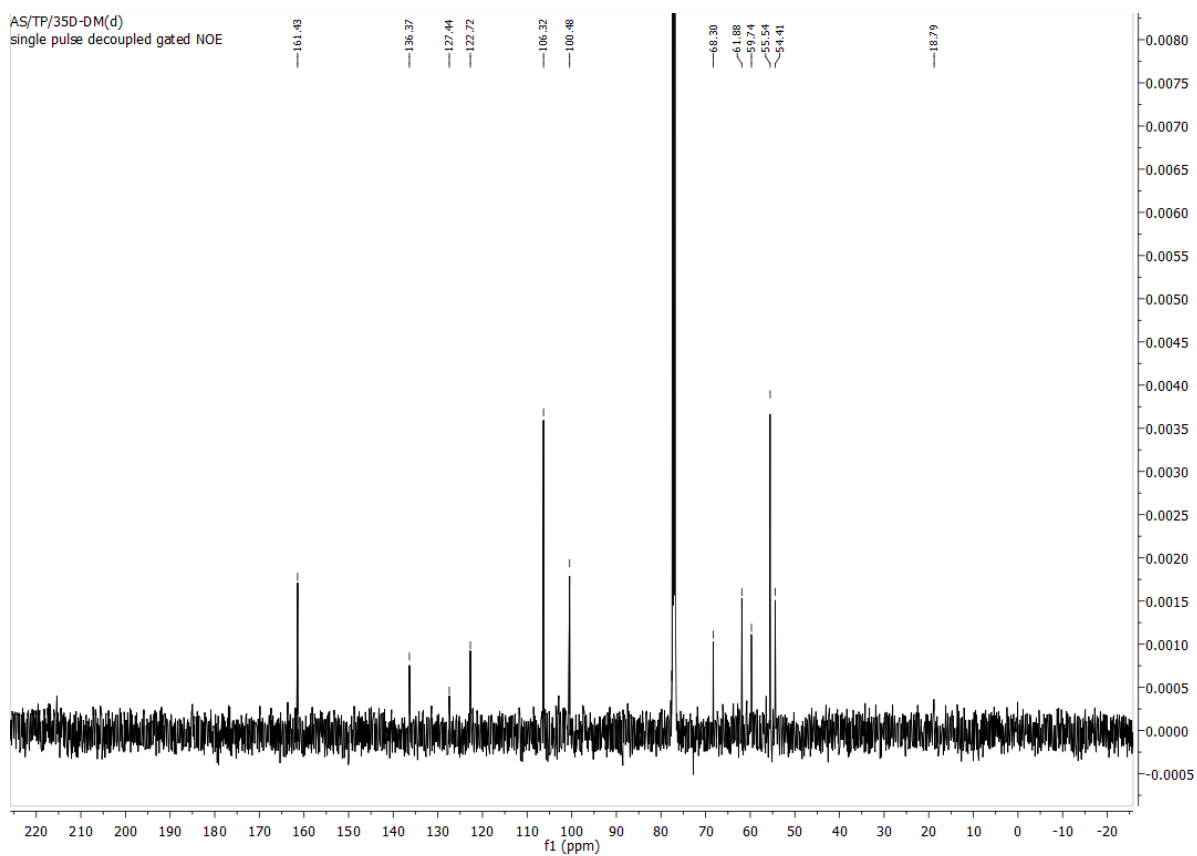

$^{13}\text{C}$  NMR of **5f** in  $\text{CDCl}_3$  at 500MHz

HPLC Purity Data of **5f**

```

=====
Acq. Operator   : SYSTEM                      Seq. Line :    4
Sample Operator : SYSTEM
Acq. Instrument : HPLC                      Location  : P2-B-04
Injection Date  : 17-03-2020 11:30:50       Inj       :    1
                                           Inj Volume: 10.000 µl
Acq. Method     : E:\Chemstation\1\Data\TIYAS_RPT 2020-03-17 10-04-05\TIYAS_RPT.M
Last changed    : 17-03-2020 10:01:12 by SYSTEM
Analysis Method : E:\CHEMSTATION\1\METHODS\TIYAS_RPT.M
Last changed    : 23-06-2020 12:51:16 by SYSTEM
Additional Info  : Peak(s) manually integrated
  
```

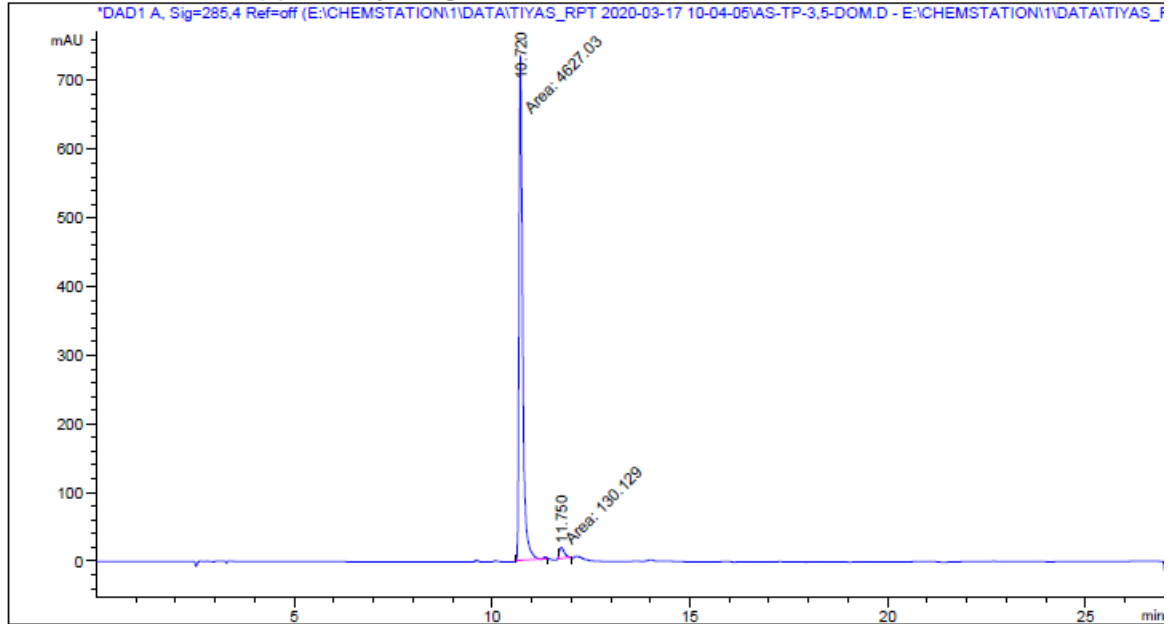

| Peak # | RetTime [min] | Type | Width [min] | Area [mAU*s] | Height [mAU] | Area %  |
|--------|---------------|------|-------------|--------------|--------------|---------|
| 1      | 10.720        | MM   | 0.1046      | 4627.03076   | 737.33258    | 97.2646 |
| 2      | 11.750        | MM   | 0.1396      | 130.12878    | 15.53761     | 2.7354  |

Totals : 4757.15955 752.87019

SPECTRAL DATA OF 5g



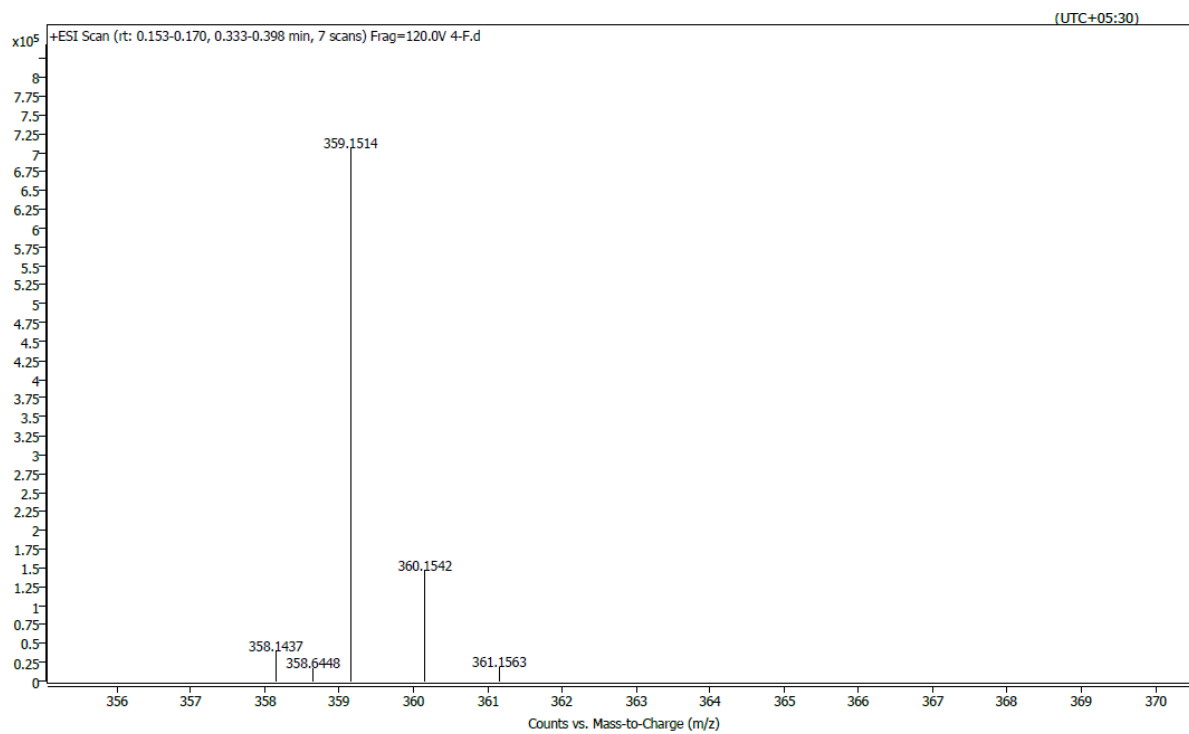

HRMS Spectrum of **5g**

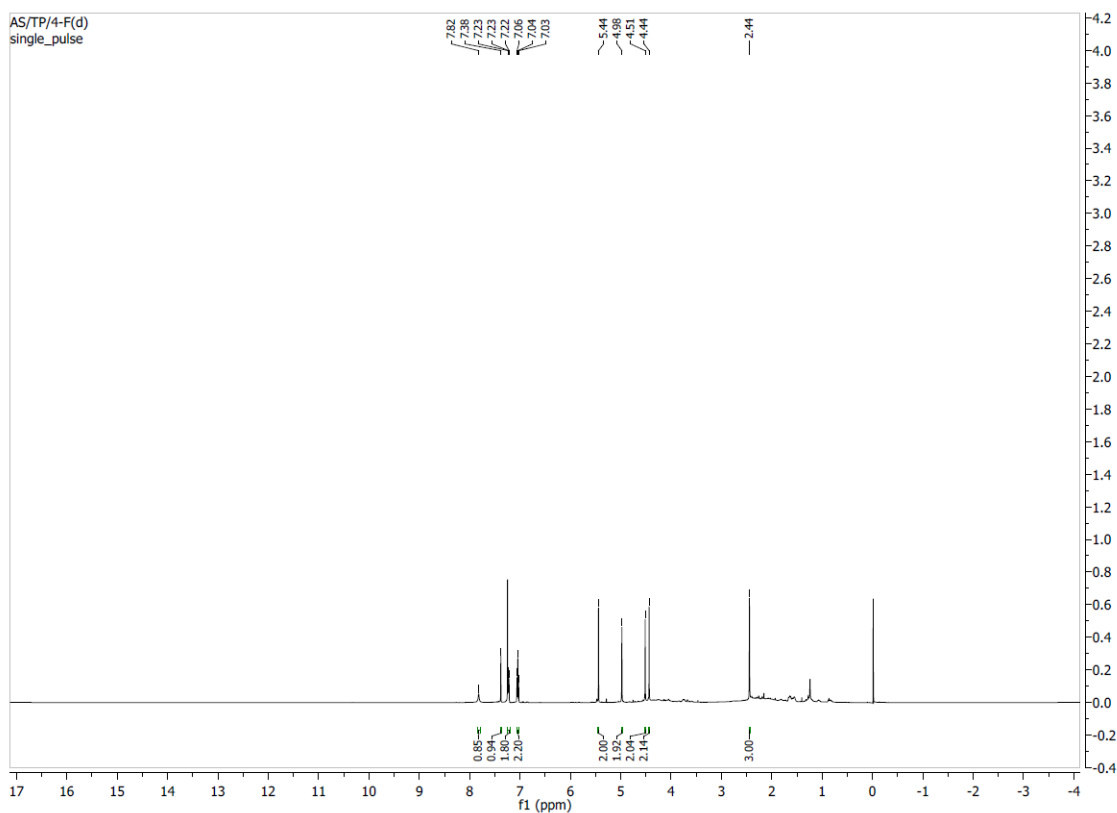

<sup>1</sup>H NMR of **5g** in CDCl<sub>3</sub> at 500MHz

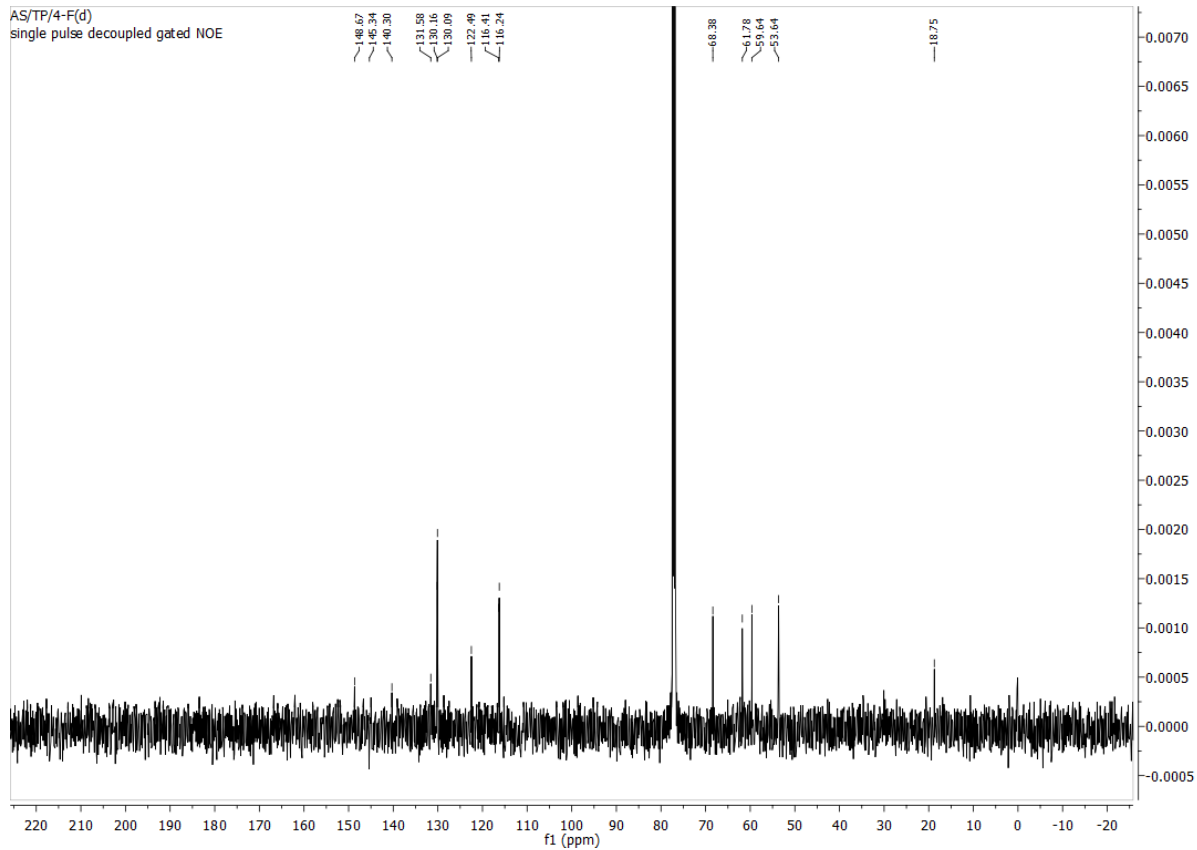

$^{13}\text{C}$  NMR of **5g** in  $\text{CDCl}_3$  at 125MHz

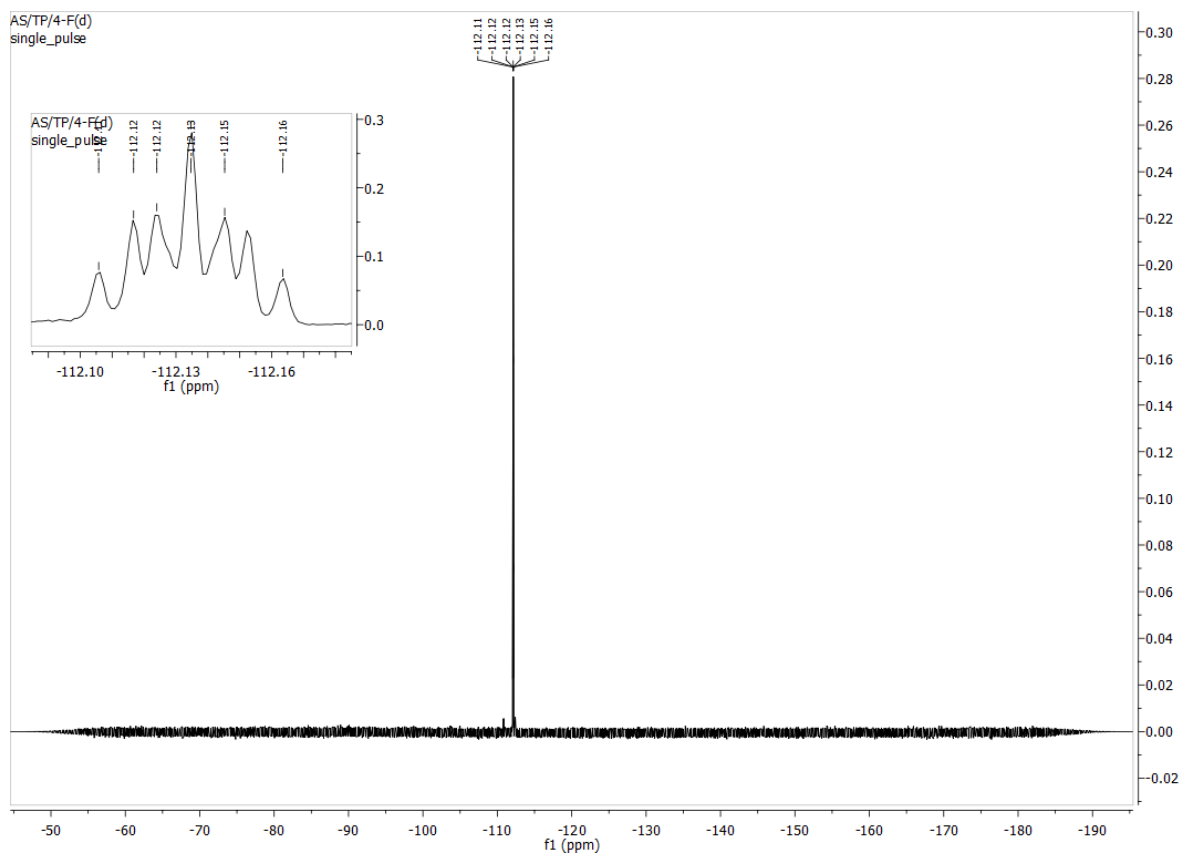

$^{19}\text{F}$  NMR of **5g** in  $\text{CDCl}_3$  at 470MHz

# HPLC Purity Data of 5g

Data File E:\CHEMSTATION\1\DATA\TIYAS\_RPT 2020-03-17 14-08-34\AS-TP-4F.D  
Sample Name: AS-TP-4F

```
=====
Acq. Operator   : SYSTEM                      Seq. Line :    7
Sample Operator : SYSTEM
Acq. Instrument : HPLC                      Location  : P2-C-04
Injection Date  : 17-03-2020 17:00:52       Inj       :    1
                                                Inj Volume: 10.000 µl

Acq. Method     : E:\Chemstation\1\Data\TIYAS_RPT 2020-03-17 14-08-34\TIYAS_RPT.M
Last changed    : 17-03-2020 10:01:12 by SYSTEM
Analysis Method : E:\Chemstation\1\Methods\AshimaFA_C-18_PREP.M
Last changed    : 23-06-2020 11:45:48 by SYSTEM
                 (modified after loading)

Additional Info : Peak(s) manually integrated
=====
```

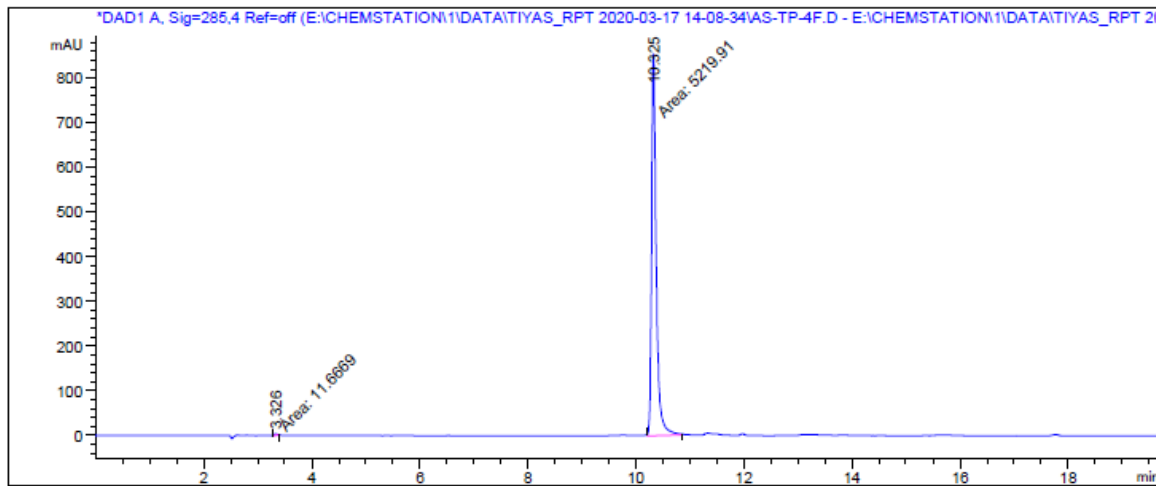

| Peak # | RetTime [min] | Type | Width [min] | Area [mAU*s] | Height [mAU] | Area %  |
|--------|---------------|------|-------------|--------------|--------------|---------|
| 1      | 3.326         | MM   | 0.0525      | 11.66694     | 3.70133      | 0.2230  |
| 2      | 10.325        | MM   | 0.1016      | 5219.90576   | 856.56024    | 99.7770 |

# SPECTRAL DATA OF 5h

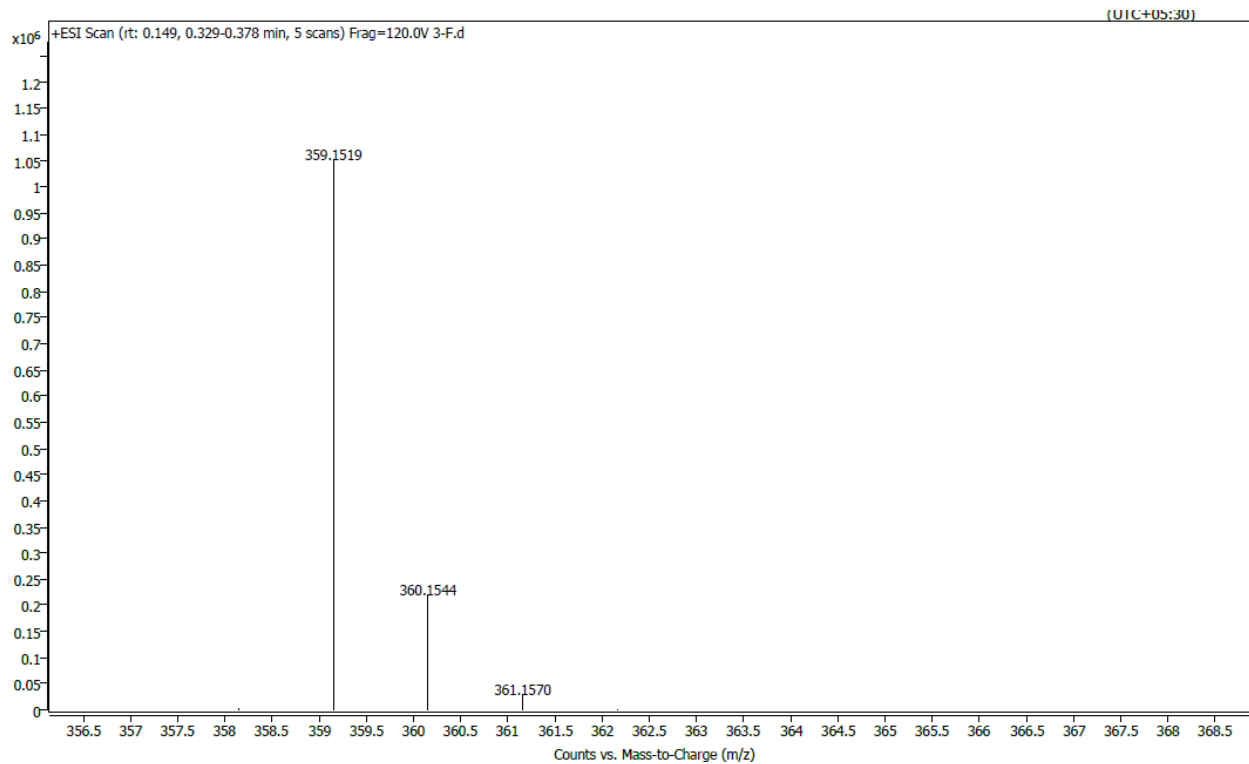

HRMS Spectrum of **5h**

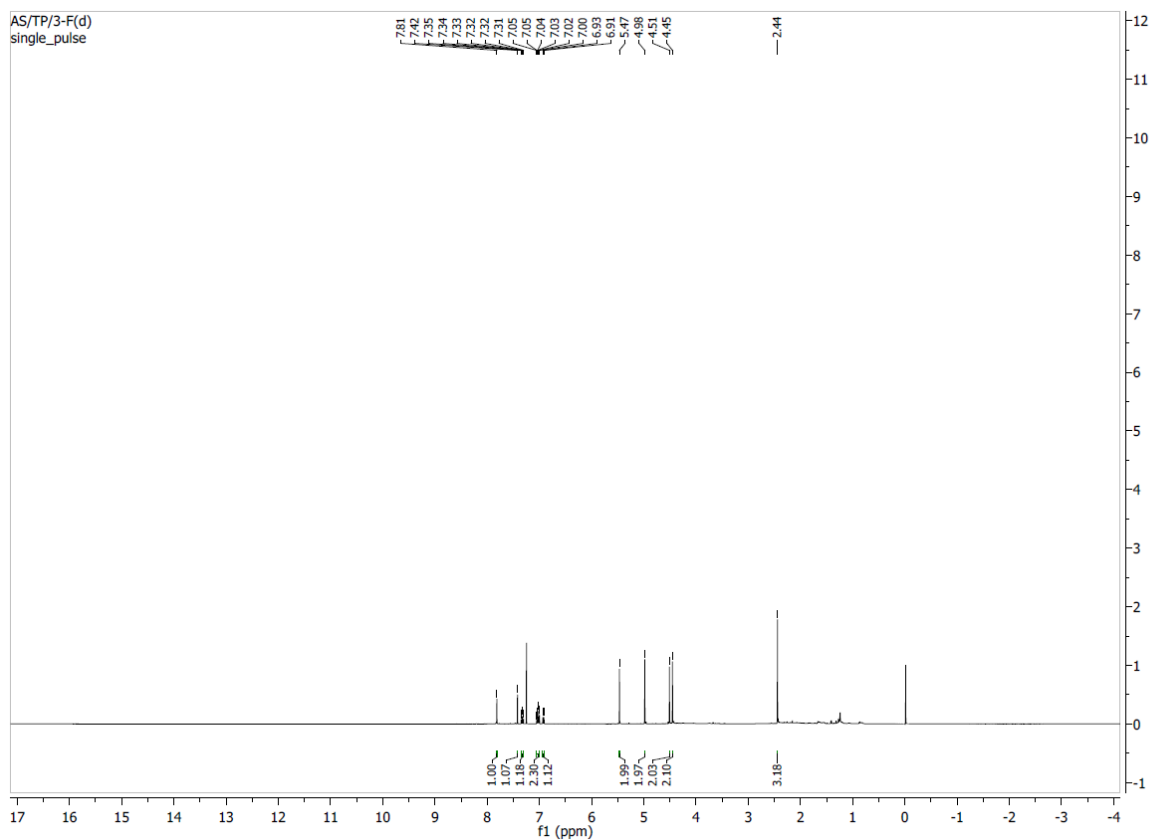

<sup>1</sup>H NMR of **5h** in CDCl<sub>3</sub> at 500MHz

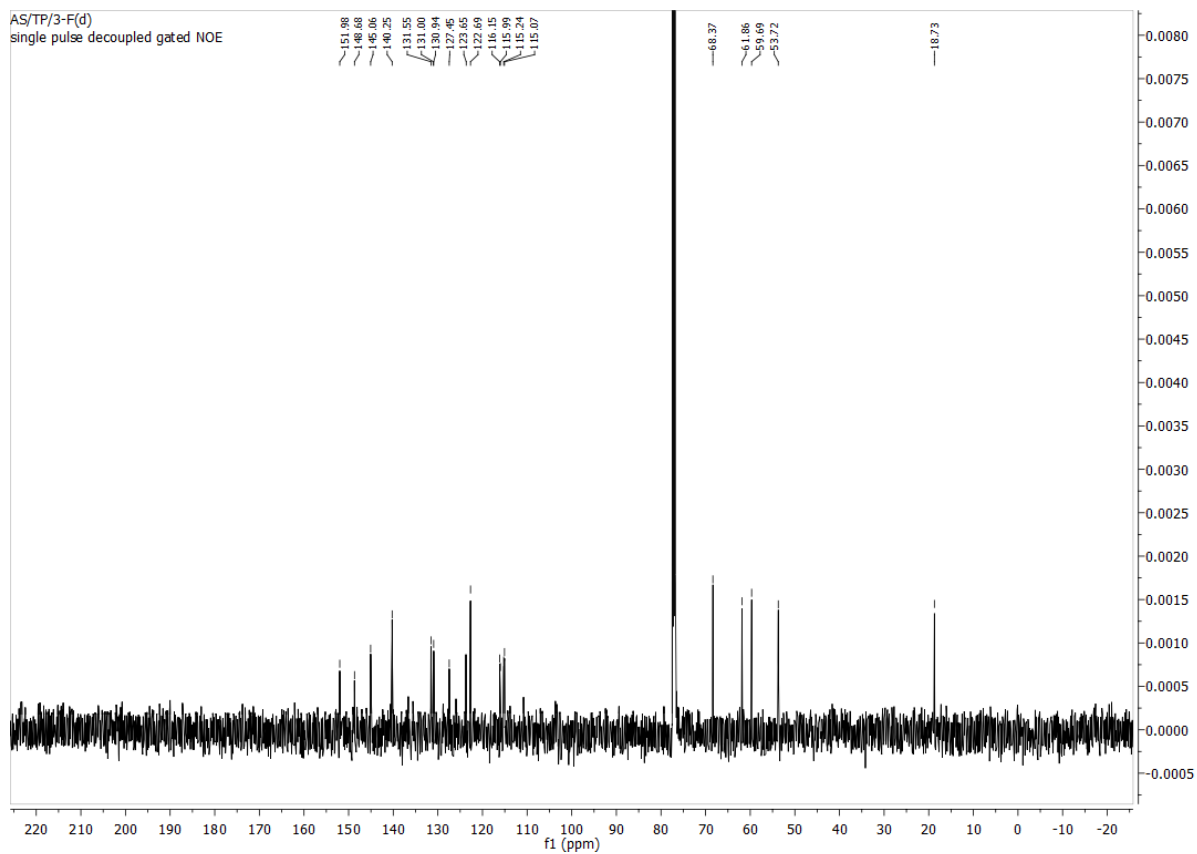

$^{13}\text{C}$  NMR of **5h** in  $\text{CDCl}_3$  at 125MHz

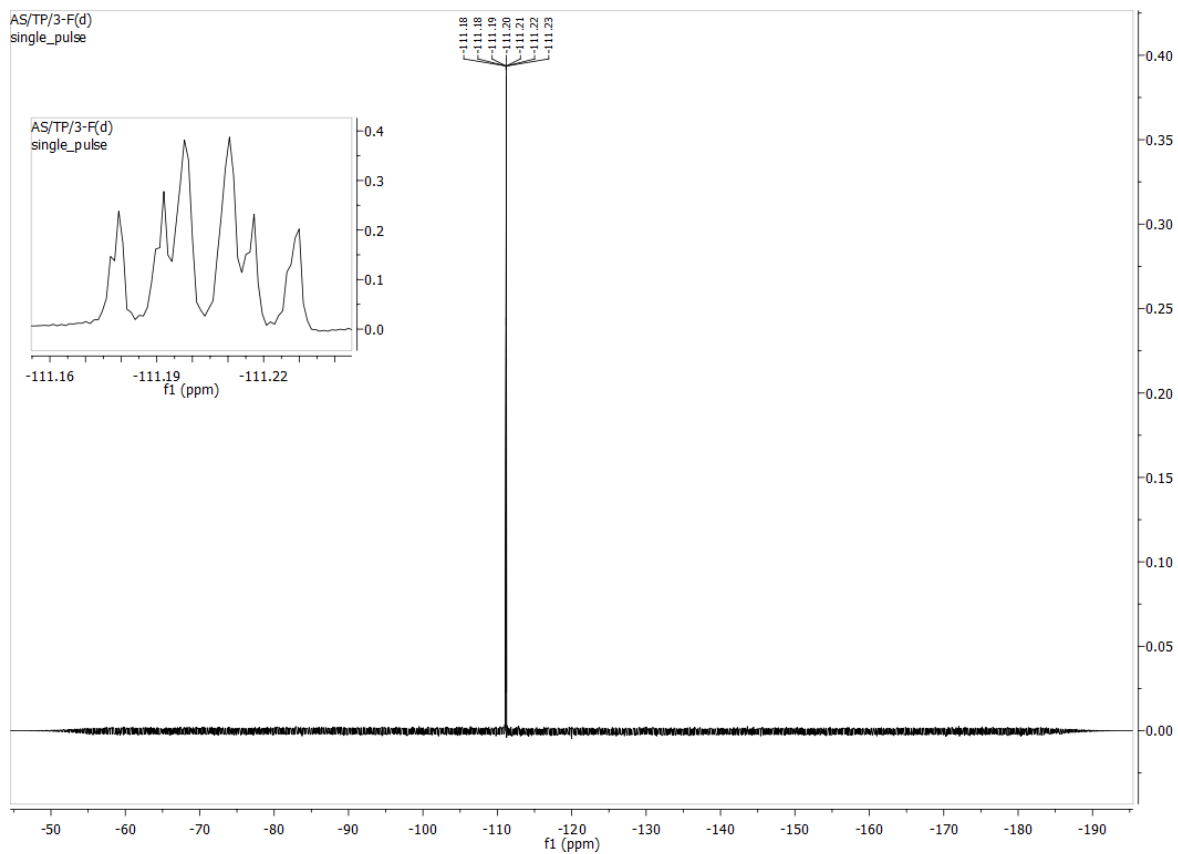

$^{19}\text{F}$  NMR of **5h** in  $\text{CDCl}_3$  at 470MHz

# HPLC Purity Data of 5h

Data File E:\CHEMSTATION\1\DATA\TIYAS\_RPT 2020-03-17 10-04-05\AS-TP-3F.D  
 Sample Name: AS-TP-3F

```

=====
Acq. Operator   : SYSTEM                      Seq. Line :    3
Sample Operator : SYSTEM
Acq. Instrument : HPLC                      Location  : P2-B-03
Injection Date  : 17-03-2020 11:02:21        Inj       :    1
                                           Inj Volume: 10.000 µl

Acq. Method     : E:\Chemstation\1\Data\TIYAS_RPT 2020-03-17 10-04-05\TIYAS_RPT.M
Last changed    : 17-03-2020 10:01:12 by SYSTEM
Analysis Method : E:\CHEMSTATION\1\METHODS\TIYAS_RPT.M
Last changed    : 23-06-2020 12:51:16 by SYSTEM
Additional Info : Peak(s) manually integrated
  
```

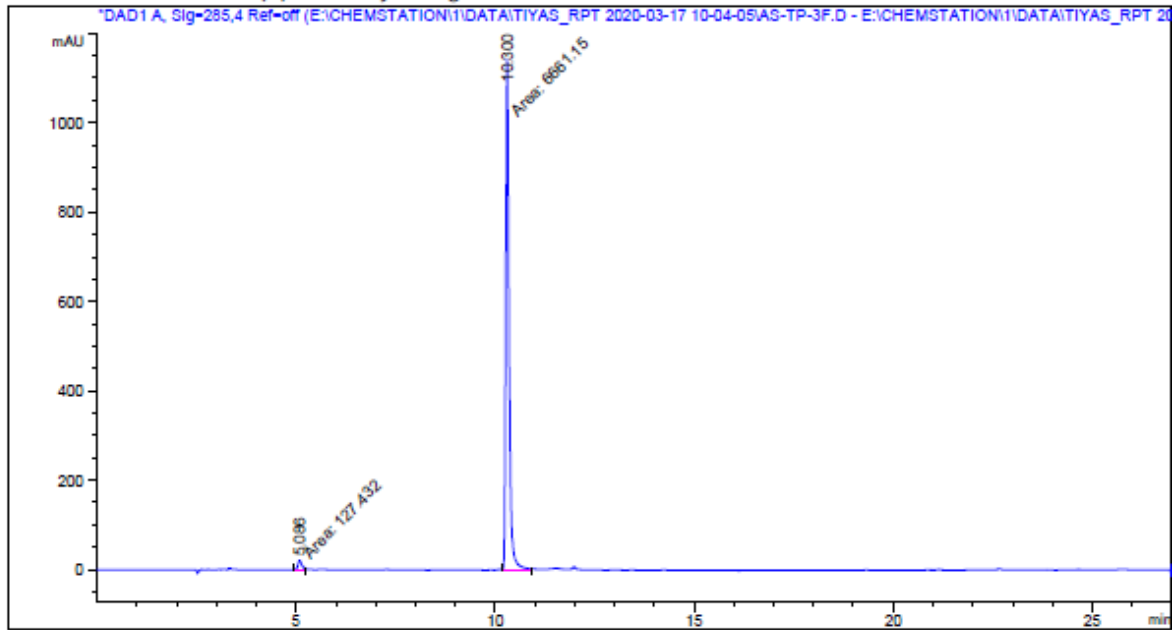

| Peak # | RetTime [min] | Type | Width [min] | Area [mAU*s] | Height [mAU] | Area %  |
|--------|---------------|------|-------------|--------------|--------------|---------|
| 1      | 5.086         | MM   | 0.1105      | 127.43169    | 19.22895     | 1.8771  |
| 2      | 10.300        | MM   | 0.0970      | 6661.14844   | 1144.58276   | 98.1229 |

Totals : 6788.58012 1163.81171

## SPECTRAL DATA OF **5i**

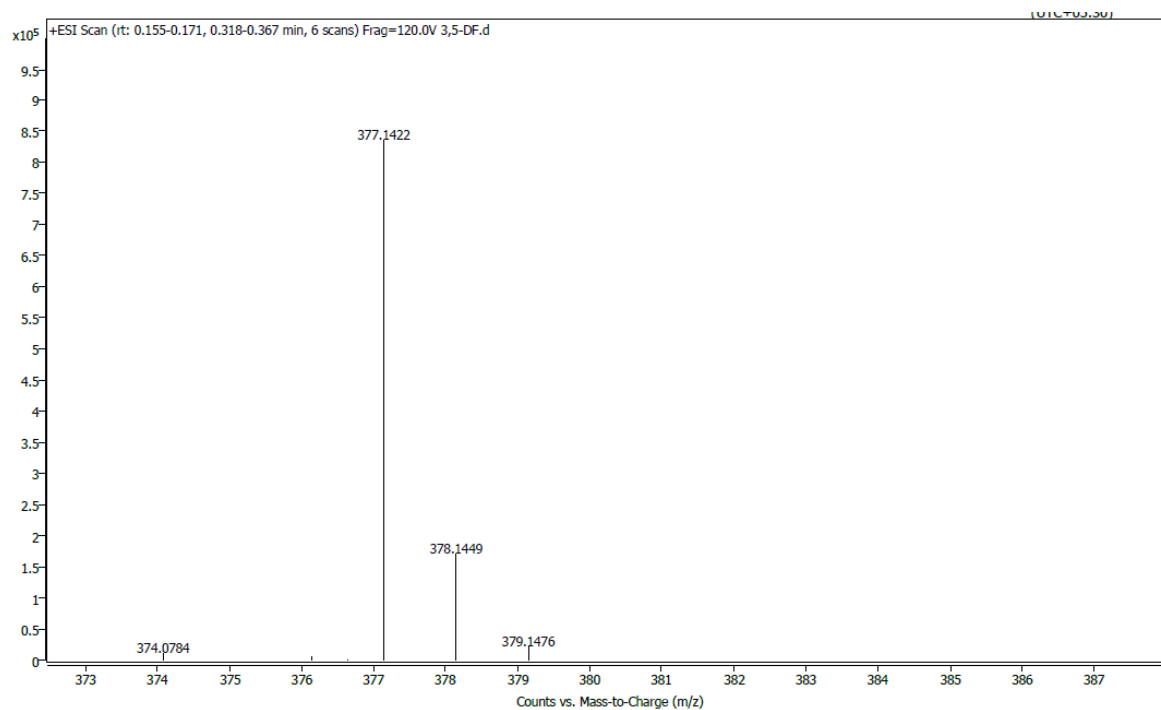

## HRMS Spectrum of **5i**

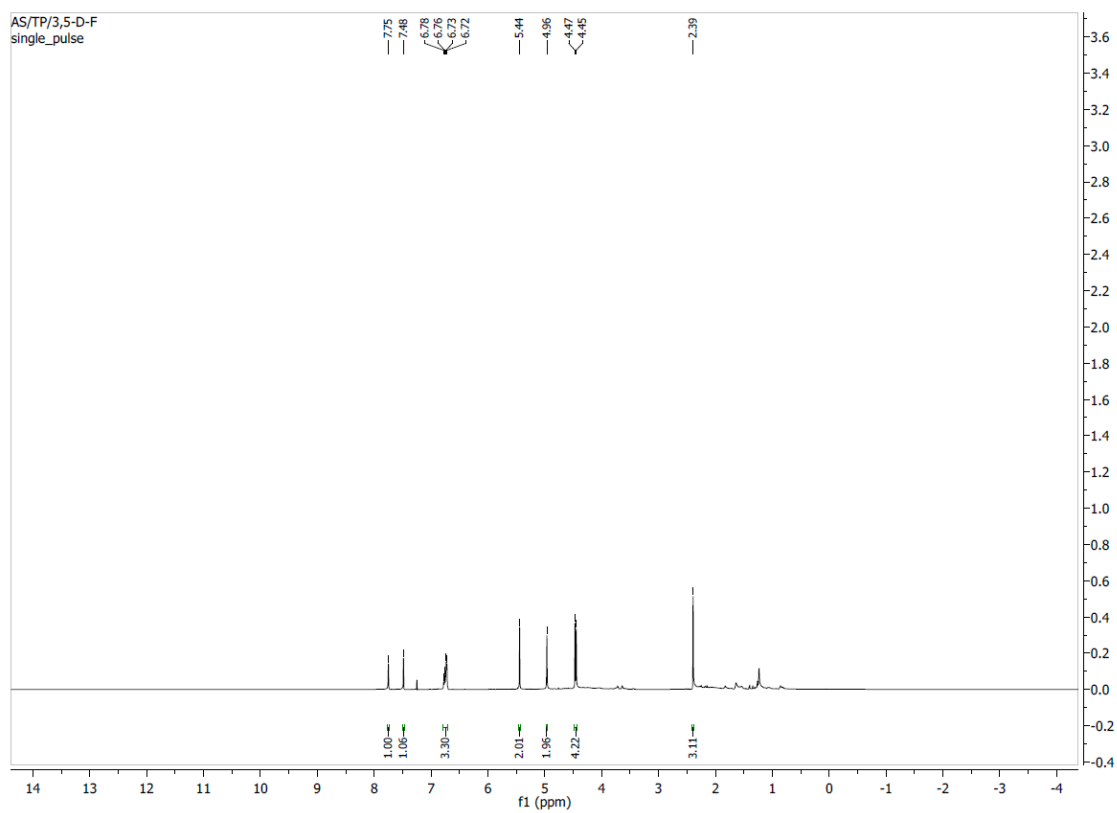

<sup>1</sup>H NMR of **5i** in CDCl<sub>3</sub> at 500MHz

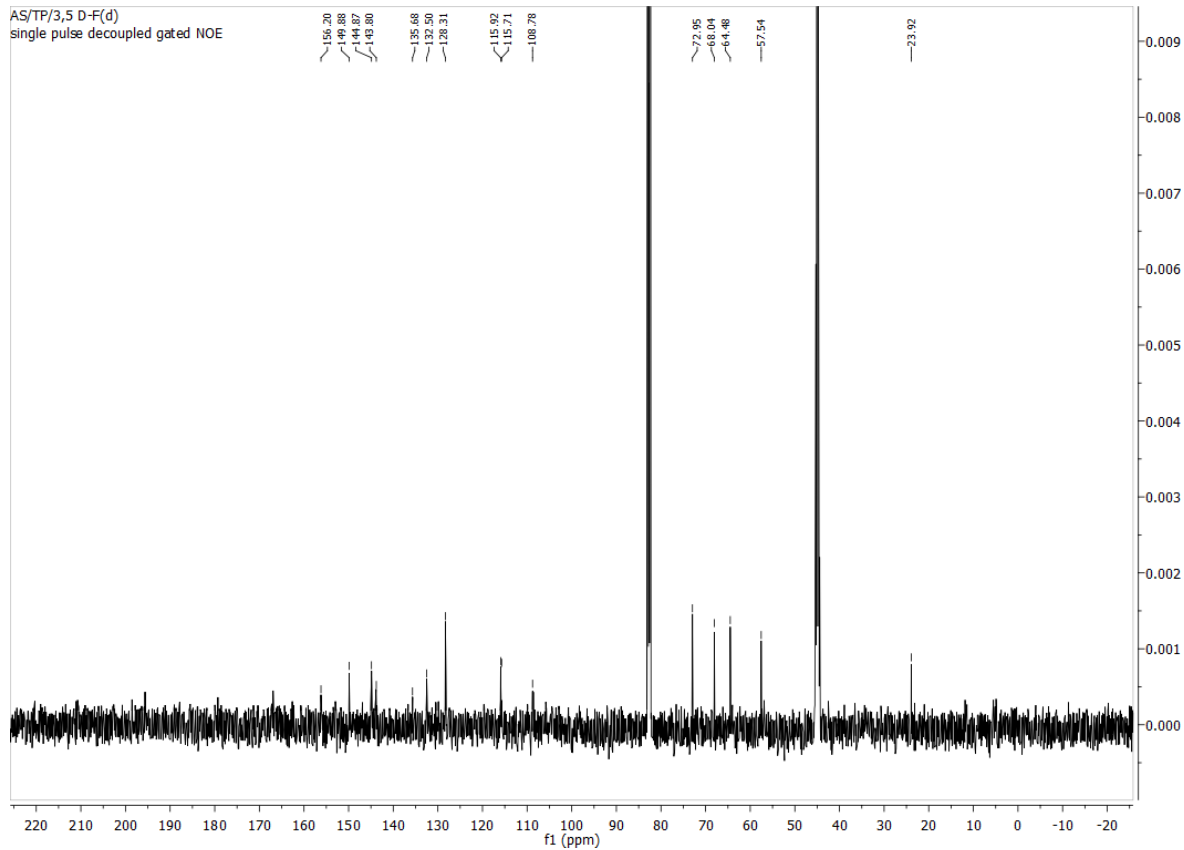

$^{13}\text{C}$  NMR of **5i** in  $\text{CDCl}_3$  and  $\text{DMSO}-d_6$  at 125MHz

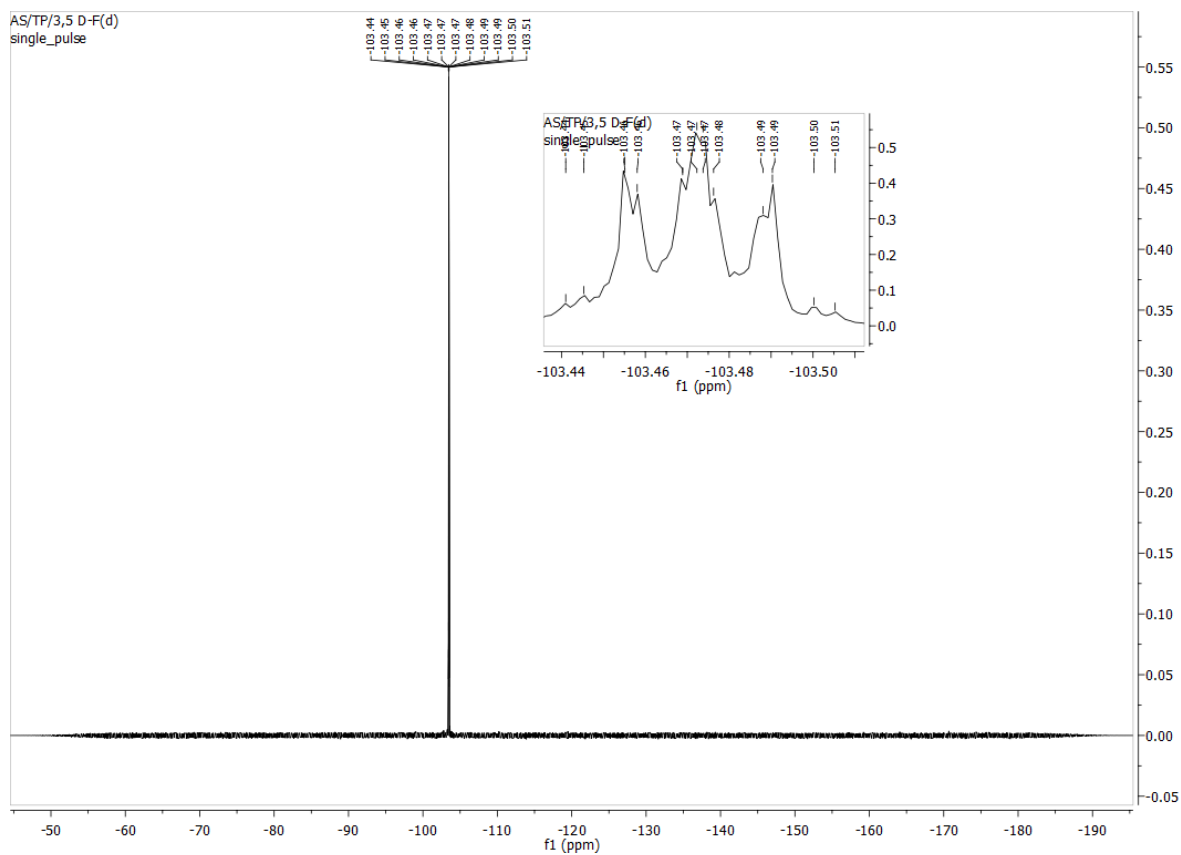

$^{19}\text{F}$  NMR of **5i** in  $\text{CDCl}_3$  at 470MHz



# HPLC Purity Data of 5i

Data File E:\CHEMSTATION\1\DATA\TIYAS\_RPT 2020-03-17 14-08-34\AS-TP-3,5-DF.D  
Sample Name: AS-TP-3,5-DF

```
=====
Acq. Operator   : SYSTEM                      Seq. Line :    4
Sample Operator : SYSTEM
Acq. Instrument : HPLC                       Location  : P2-C-01
Injection Date  : 17-03-2020 15:35:26       Inj       :    1
                                           Inj Volume: 10.000 µl
Acq. Method     : E:\Chemstation\1\Data\TIYAS_RPT 2020-03-17 14-08-34\TIYAS_RPT.M
Last changed    : 17-03-2020 10:01:12 by SYSTEM
Analysis Method : E:\Chemstation\1\Methods\AshimaFA_C-18_PREP.M
Last changed    : 23-06-2020 11:45:48 by SYSTEM
                (modified after loading)
Additional Info : Peak(s) manually integrated
=====
```

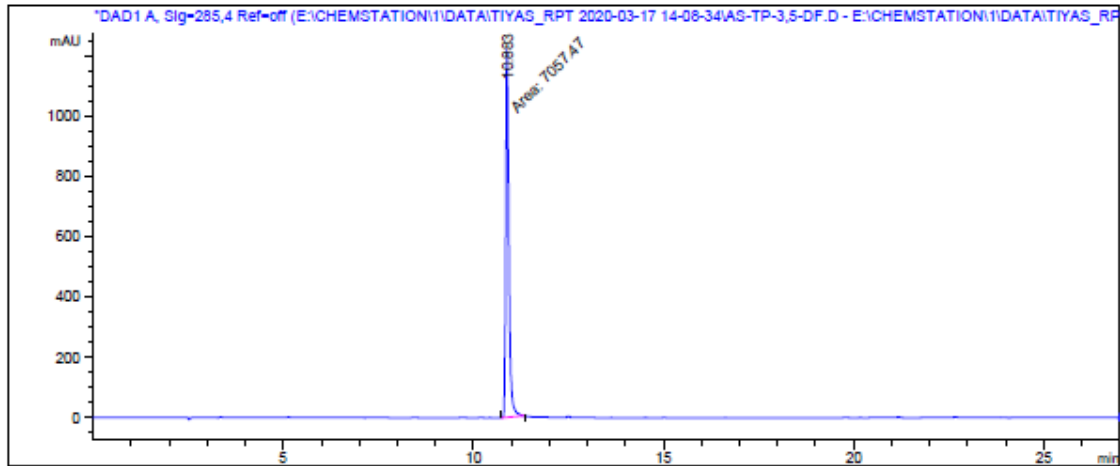

| Peak # | RetTime [min] | Type | Width [min] | Area [mAU*s] | Height [mAU] | Area %   |
|--------|---------------|------|-------------|--------------|--------------|----------|
| 1      | 10.883        | MM   | 0.0964      | 7057.46729   | 1220.70032   | 100.0000 |

Totals :                                    7057.46729 1220.70032

# SPECTRAL DATA OF 5j

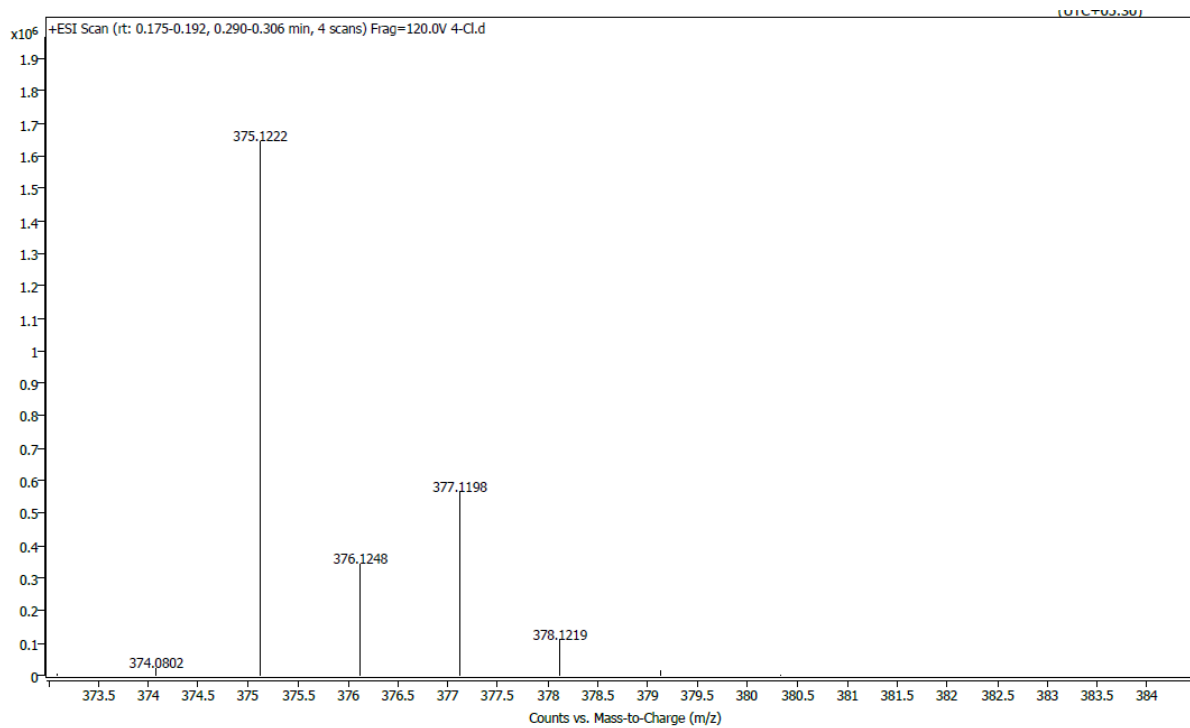

### HRMS Spectrum of **5j**

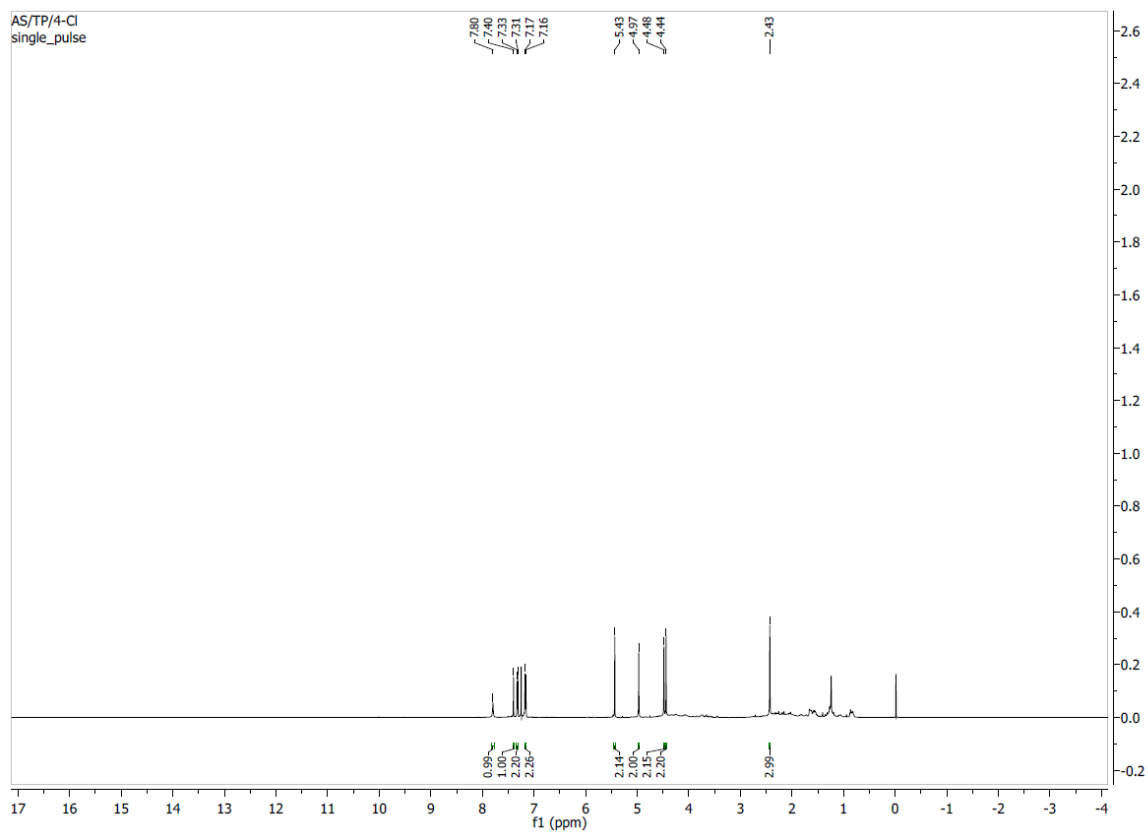

### <sup>1</sup>H NMR of **5j** in CDCl<sub>3</sub> at 500MHz

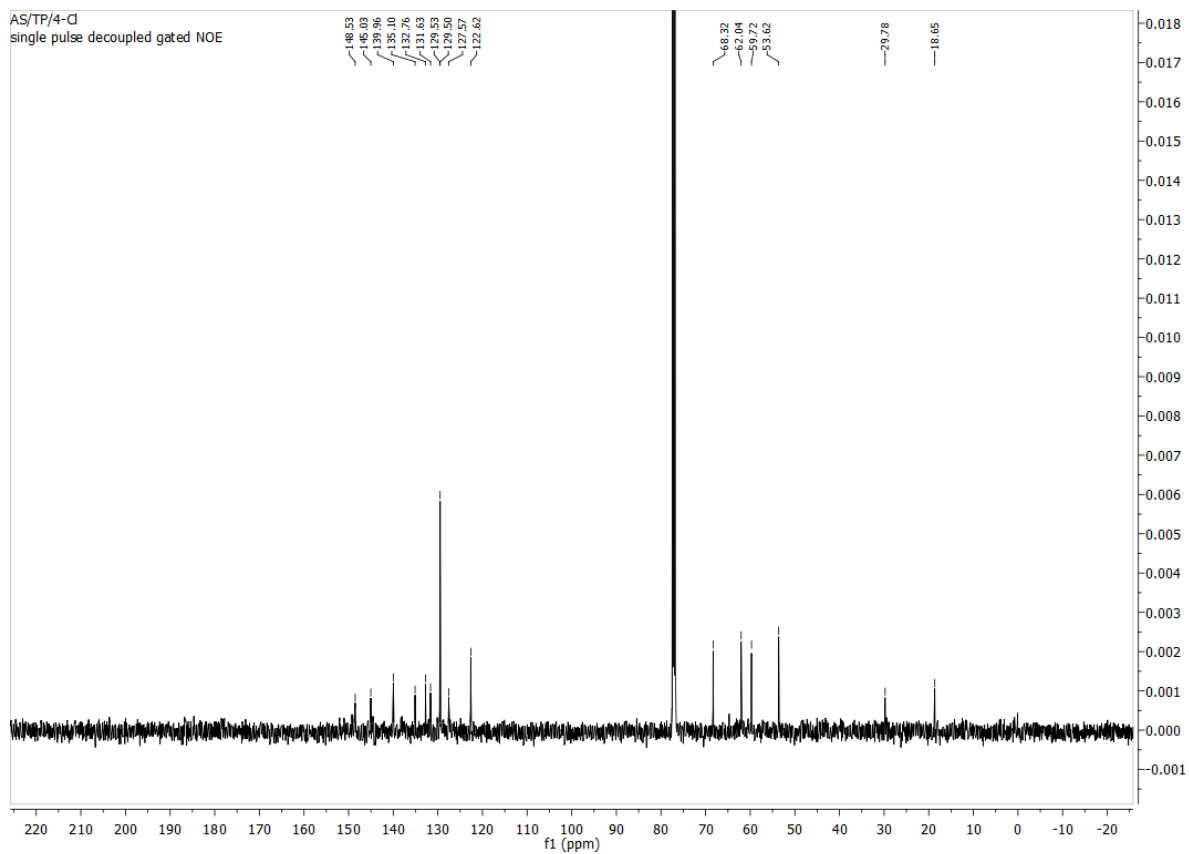

$^{13}\text{C}$  NMR of **5j** in  $\text{CDCl}_3$  at 125MHz

HPLC Purity Data of **5j**

Data File E:\CHEMSTATION\1\DATA\TIYAS\_RPT 2020-03-17 14-08-34\AS-TP-4C1.D  
 Sample Name: AS-TP-4C1

```

=====
Acq. Operator   : SYSTEM                      Seq. Line :    3
Sample Operator : SYSTEM
Acq. Instrument : HPLC                      Location  : P2-B-11
Injection Date  : 17-03-2020 15:06:55       Inj       :    1
                                           Inj Volume: 10.000 µl
Acq. Method    : E:\Chemstation\1\Data\TIYAS_RPT 2020-03-17 14-08-34\TIYAS_RPT.M
Last changed   : 17-03-2020 10:01:12 by SYSTEM
Analysis Method: E:\Chemstation\1\Methods\AshimaFA_C-18_PREP.M
Last changed   : 23-06-2020 11:45:48 by SYSTEM
                (modified after loading)
Additional Info : Peak(s) manually integrated
=====
  
```

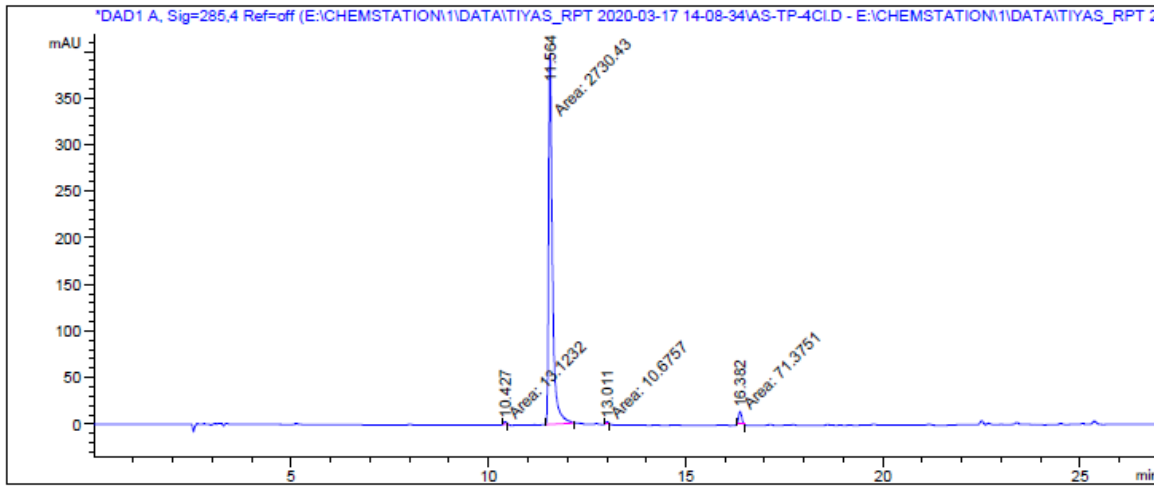

| Peak #   | RetTime [min] | Type | Width [min] | Area [mAU*s] | Height [mAU] | Area %  |
|----------|---------------|------|-------------|--------------|--------------|---------|
| 1        | 10.427        | MM   | 0.0739      | 13.12324     | 2.95965      | 0.4644  |
| 2        | 11.564        | MM   | 0.1136      | 2730.43091   | 400.41803    | 96.6317 |
| 3        | 13.011        | MM   | 0.0673      | 10.67574     | 2.64308      | 0.3778  |
| 4        | 16.382        | MM   | 0.0882      | 71.37511     | 13.49467     | 2.5260  |
| Totals : |               |      |             | 2825.60500   | 419.51544    |         |

SPECTRAL DATA OF 5k

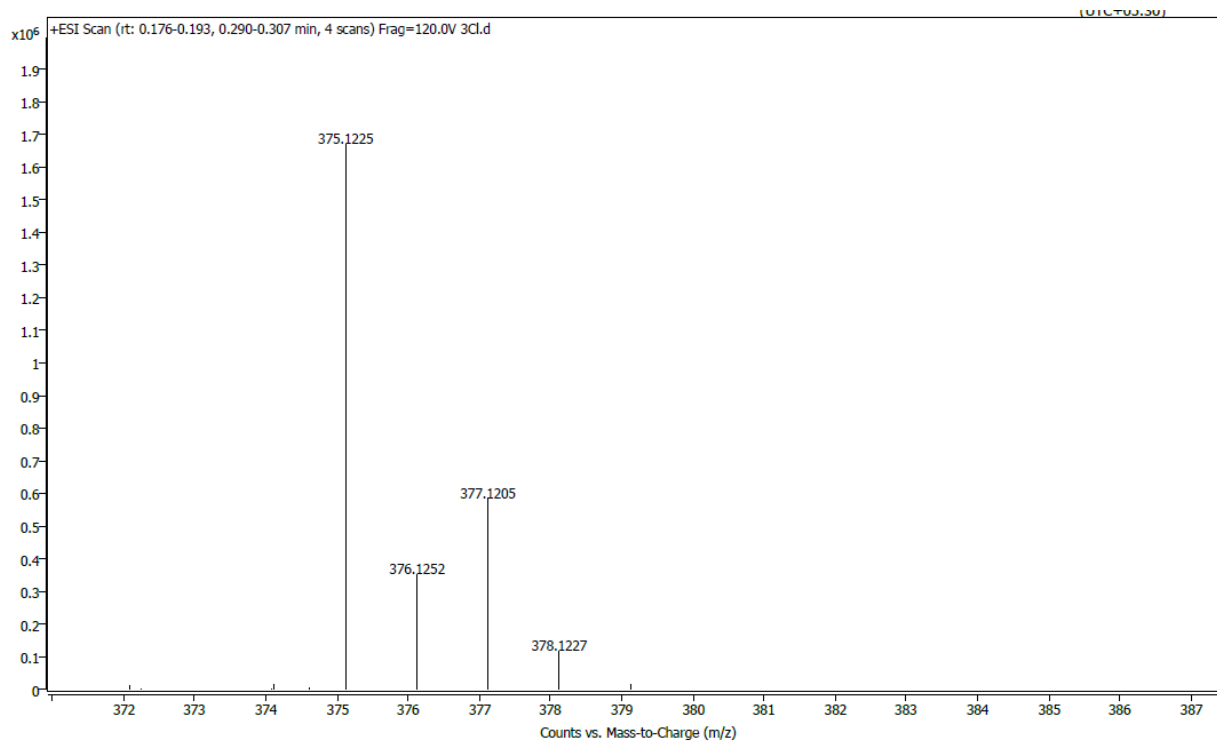

HRMS Spectrum of **5k**

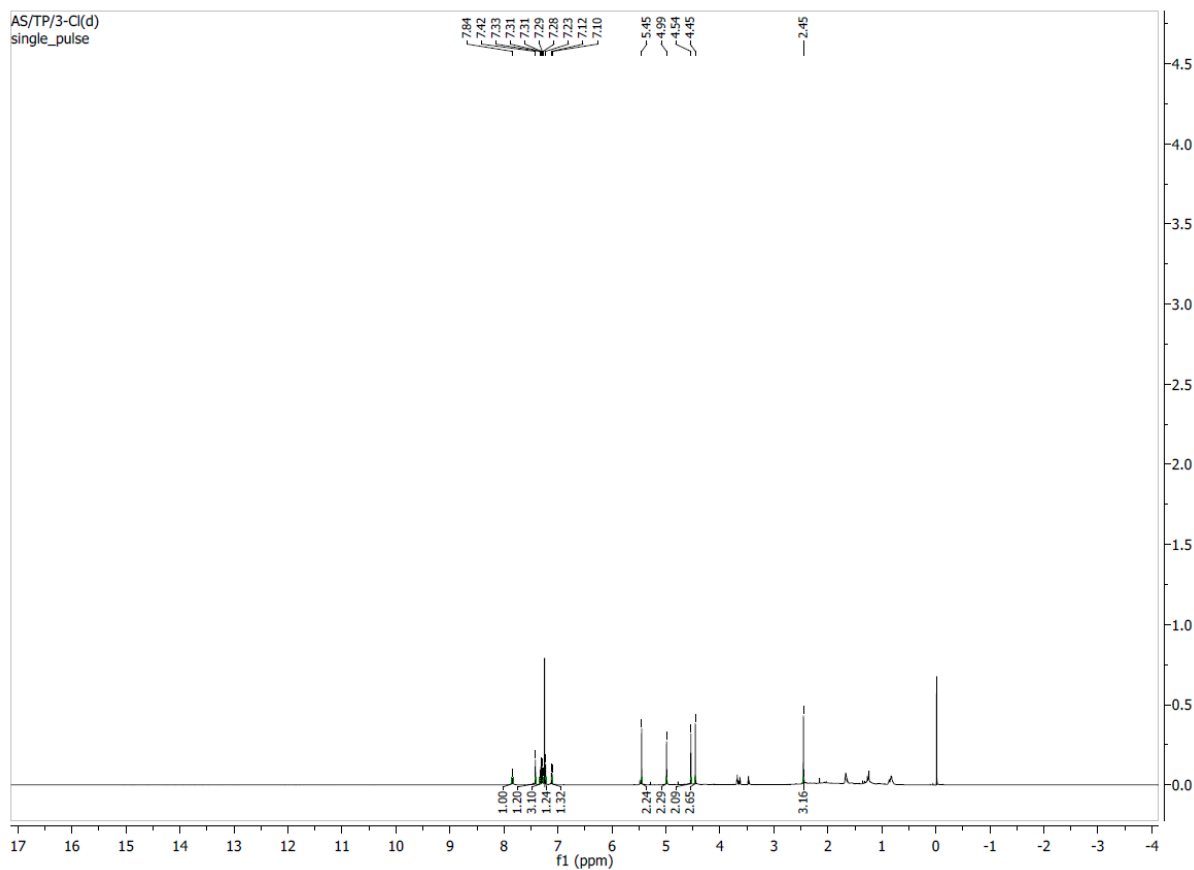

<sup>1</sup>H NMR of **5k** in CDCl<sub>3</sub> at 500MHz

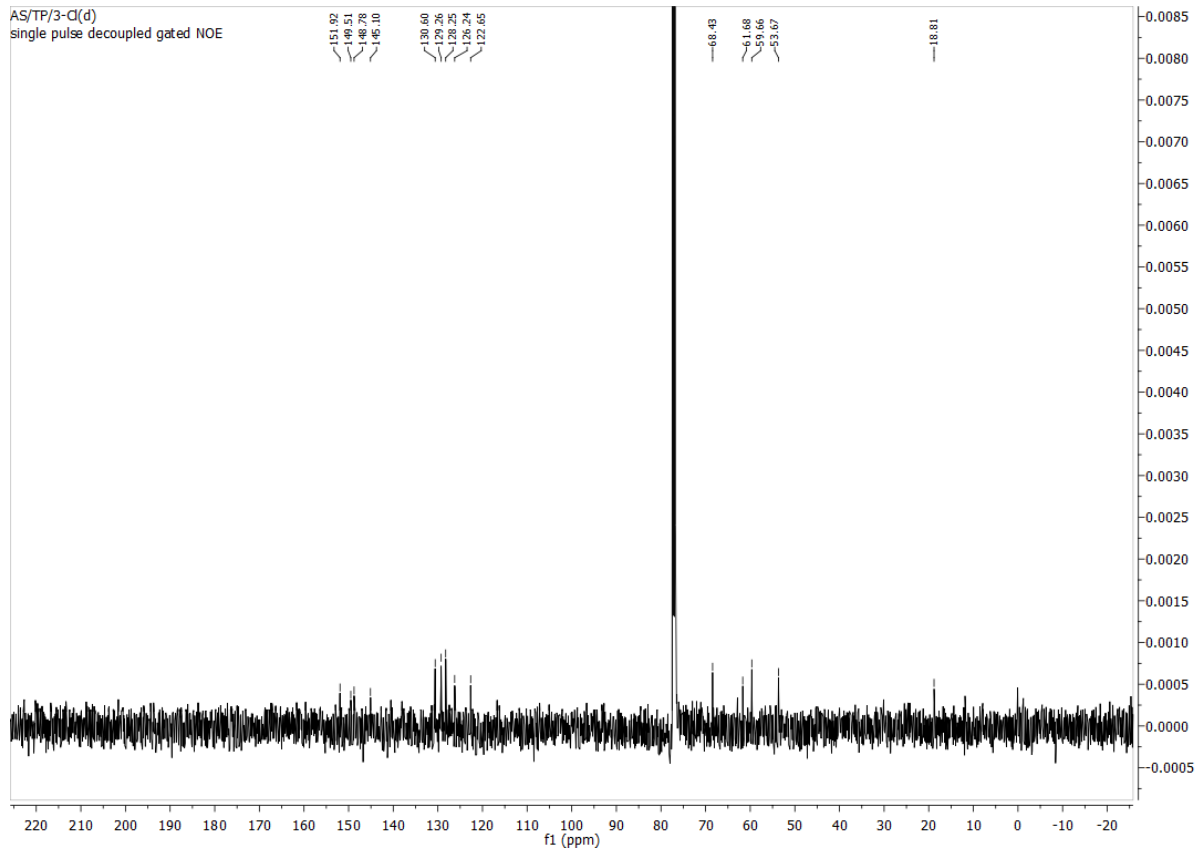

$^{13}\text{C}$  NMR of **5k** in  $\text{CDCl}_3$  at 125MHz

HPLC Purity Data of **5k**

```

=====
Acq. Operator   : SYSTEM                      Seq. Line :    7
Sample Operator : SYSTEM
Acq. Instrument : HPLC                       Location  : P2-C-04
Injection Date  : 17-03-2020 17:00:52       Inj       :    1
                                                Inj Volume: 10.000 µl
Acq. Method     : E:\Chemstation\1\Data\TIYAS_RPT 2020-03-17 14-08-34\TIYAS_RPT.M
Last changed    : 17-03-2020 10:01:12 by SYSTEM
Analysis Method : E:\CHEMSTATION\1\METHODS\WASH_AA_61_Min.M
Last changed    : 18-03-2020 10:06:13 by SYSTEM
Additional Info  : Peak(s) manually integrated
  
```

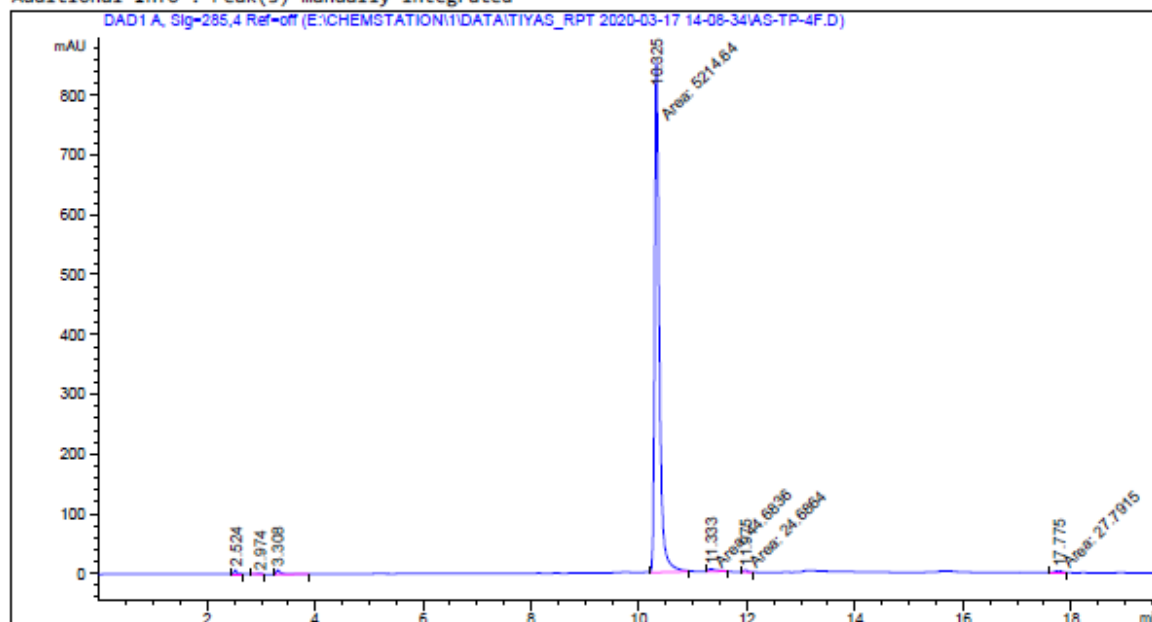

| Peak # | RetTime [min] | Type | Width [min] | Area [mAU*s] | Height [mAU] | Area %  |
|--------|---------------|------|-------------|--------------|--------------|---------|
| 1      | 2.524         | BV R | 0.0527      | 23.56682     | 7.09809      | 0.4377  |
| 2      | 2.974         | BB   | 0.0865      | 7.85408      | 1.29955      | 0.1459  |
| 3      | 3.308         | BB   | 0.0783      | 40.85798     | 7.41770      | 0.7589  |
| 4      | 10.325        | MM   | 0.1015      | 5214.64063   | 856.06323    | 96.8529 |
| 5      | 11.333        | MM   | 0.1868      | 44.68361     | 3.98615      | 0.8299  |
| 6      | 11.975        | MM   | 0.1035      | 24.68643     | 3.97545      | 0.4585  |
| 7      | 17.775        | MM   | 0.1364      | 27.79146     | 3.39607      | 0.5162  |

Totals : 5384.08101 883.23625

# SPECTRAL DATA OF **51**

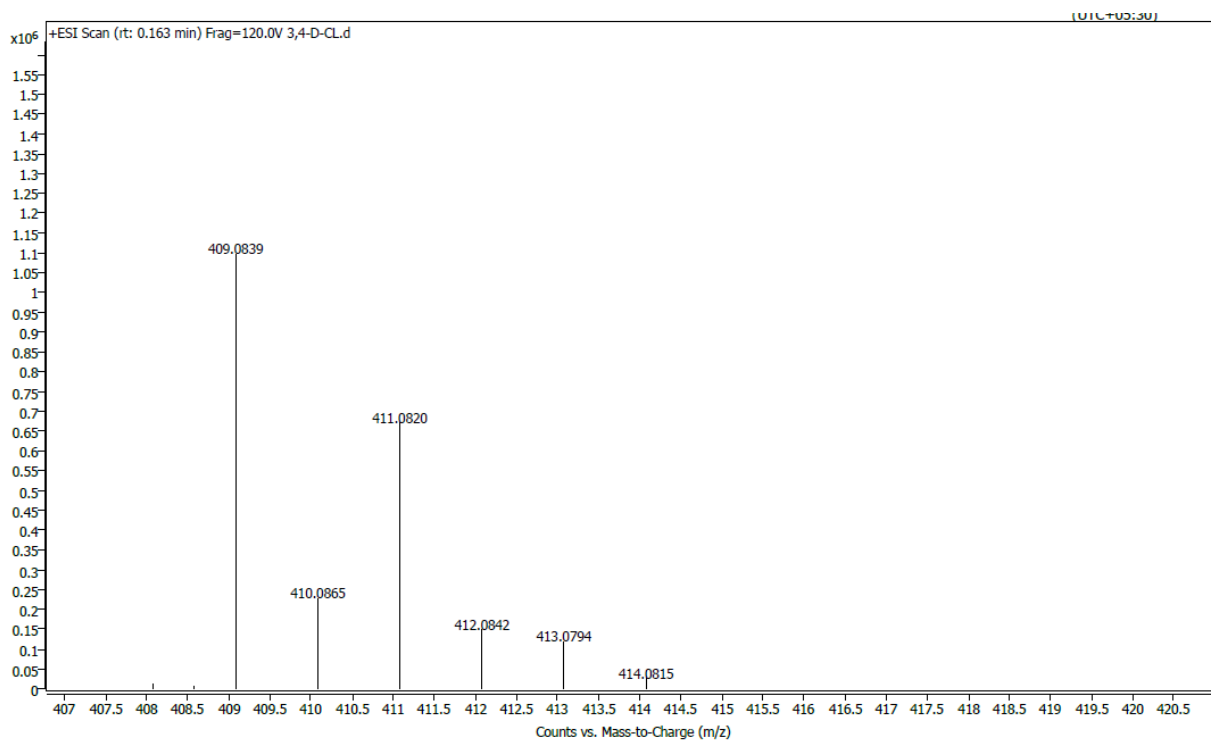

## HRMS Spectrum of **51**

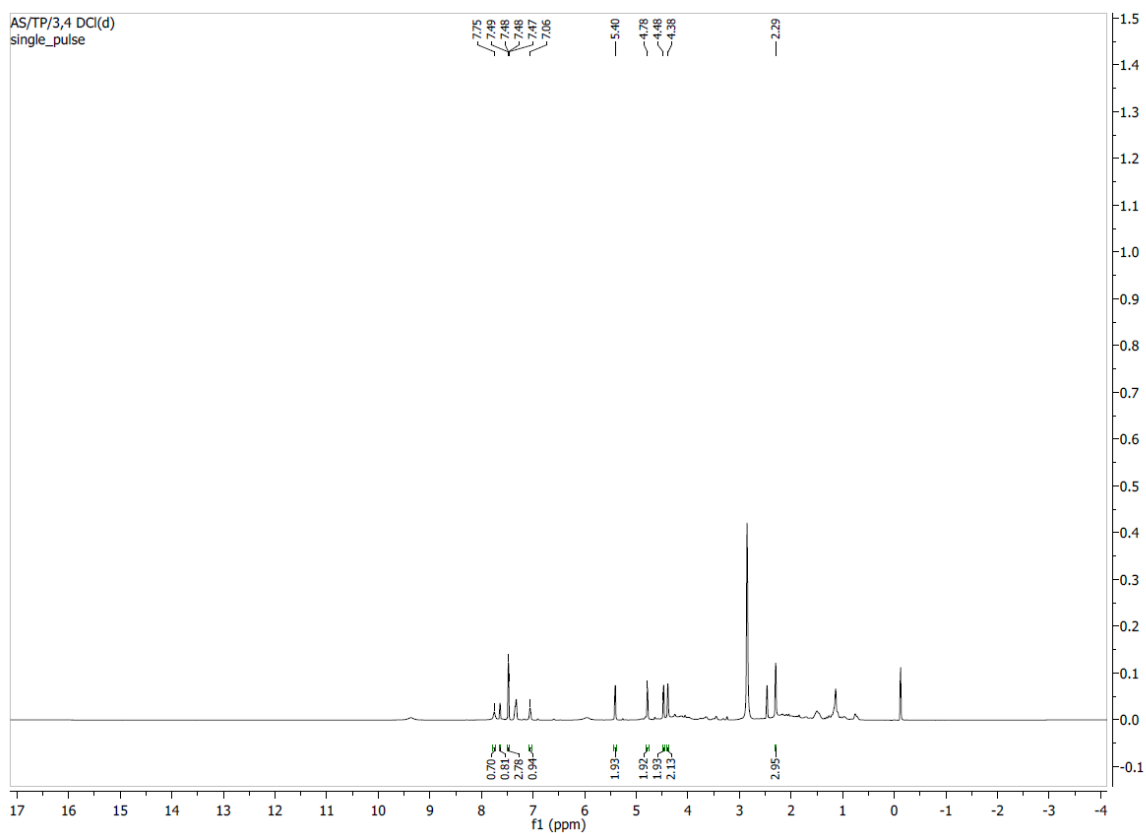

<sup>1</sup>H NMR of **51** in CDCl<sub>3</sub> and DMSO-*d*<sub>6</sub> at 500MHz



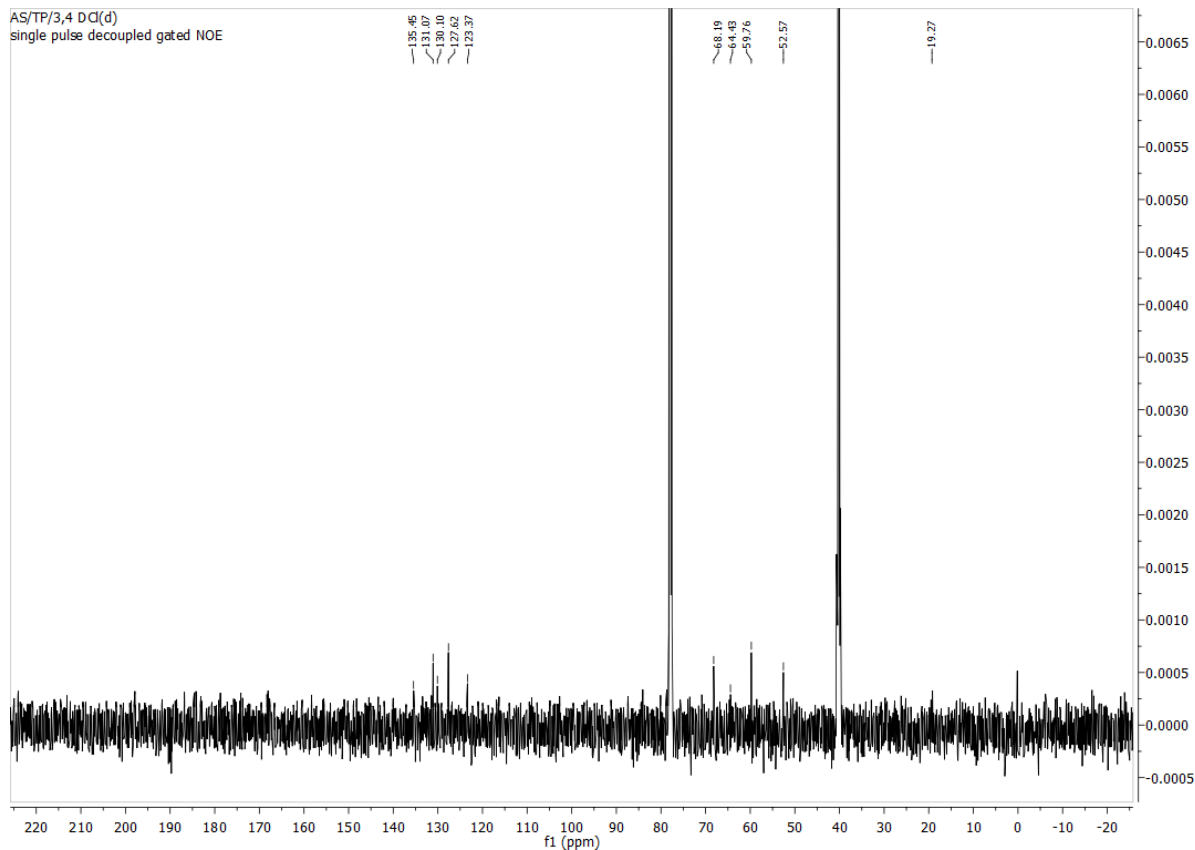

$^{13}\text{C}$  NMR of **5I** in  $\text{CDCl}_3$  and  $\text{DMSO}-d_6$  at 125MHz

## HPLC Purity Data of **5I**

Data File E:\CHEMSTATION\1\DATA\TIYAS\_RPT 2020-03-17 14-08-34\AS-TP-3F.D

Sample Name: AS-TP-3F

```

=====
Acq. Operator   : SYSTEM                      Seq. Line :    1
Sample Operator : SYSTEM
Acq. Instrument : HPLC                       Location  : P2-B-09
Injection Date  : 17-03-2020 14:09:56        Inj       :    1
                                           Inj Volume: 10.000 µl
Acq. Method    : E:\Chemstation\1\Data\TIYAS_RPT 2020-03-17 14-08-34\TIYAS_RPT.M
Last changed   : 17-03-2020 10:01:12 by SYSTEM
Analysis Method : E:\Chemstation\1\Methods\AshimaFA_C-18_PREP.M
Last changed   : 23-06-2020 11:45:48 by SYSTEM
                (modified after loading)
  
```

Additional Info : Peak(s) manually integrated

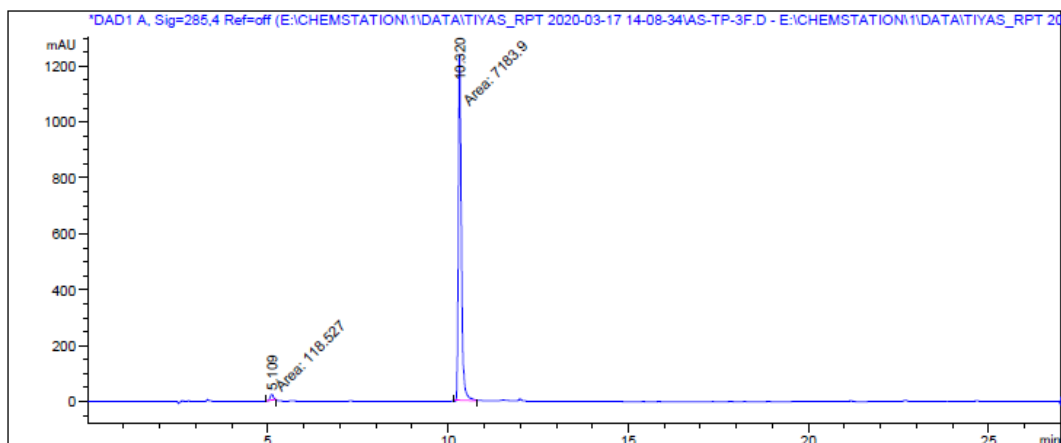

| Peak # | RetTime [min] | Type | Width [min] | Area [mAU*s] | Height [mAU] | Area %  |
|--------|---------------|------|-------------|--------------|--------------|---------|
| 1      | 5.109         | MM   | 0.0968      | 118.52690    | 20.41121     | 1.6231  |
| 2      | 10.320        | MM   | 0.0965      | 7183.89844   | 1240.68188   | 98.3769 |

Totals : 7302.42534 1261.09309

### SPECTRAL DATA OF 5m

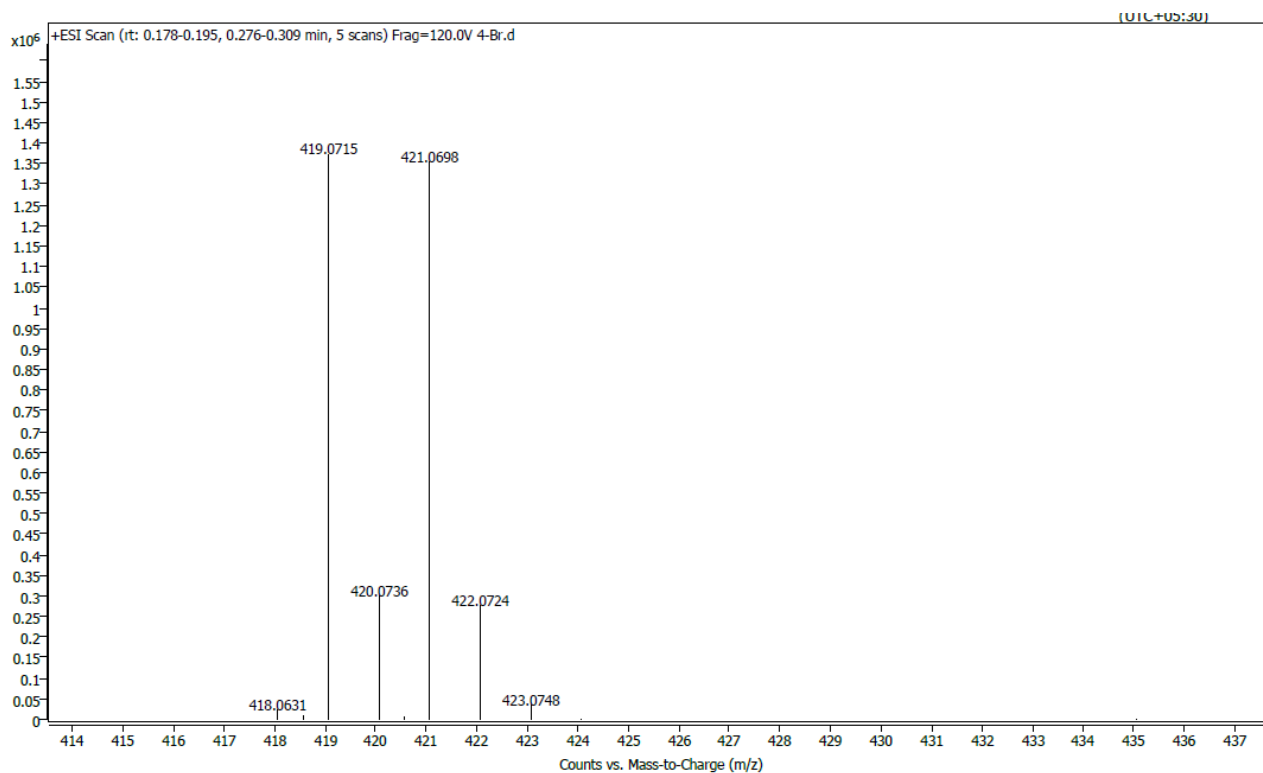

### HRMS Spectrum of 5m

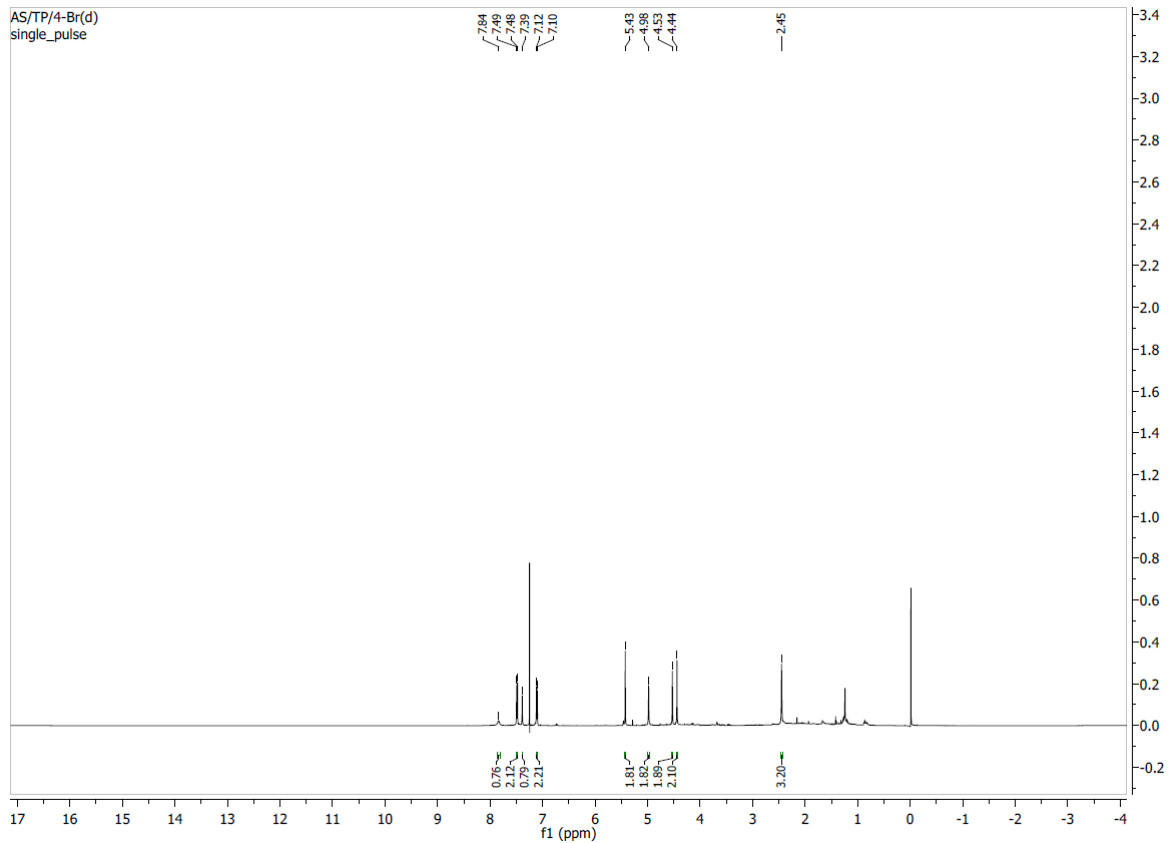

$^1\text{H}$  NMR of **5m** in  $\text{CDCl}_3$  at 500MHz

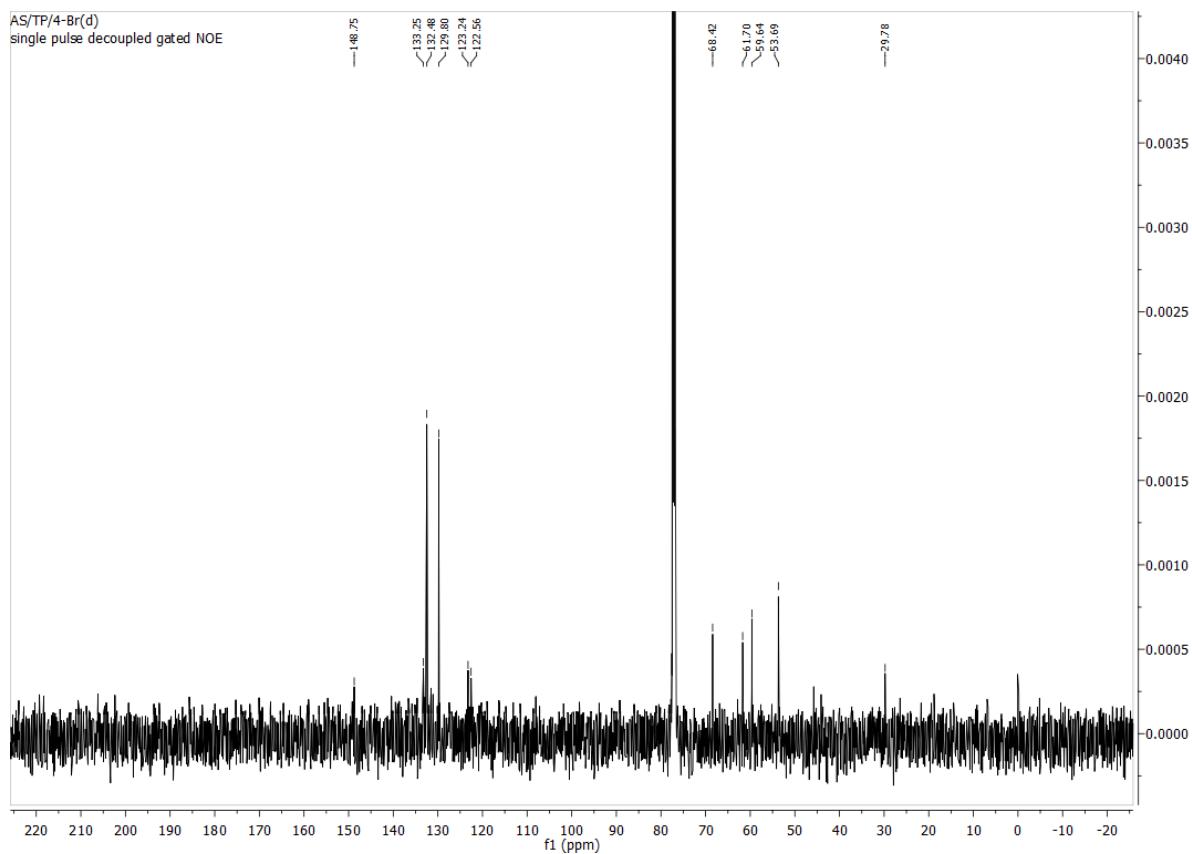

<sup>13</sup>C NMR of **5m** in CDCl<sub>3</sub> at 125MHz

### HPLC Purity Data of **5m**

Data File E:\CHEMSTATION\1\DATA\TIYAS\_RPT 2020-03-17 10-04-05\AS-TP-4Br.D  
Sample Name: AS-TP-4Br

```
=====
Acq. Operator   : SYSTEM                      Seq. Line :    5
Sample Operator : SYSTEM
Acq. Instrument : HPLC                       Location  : P2-B-05
Injection Date  : 17-03-2020 11:59:20        Inj       :    1
                                                Inj Volume: 10.000 µl
Acq. Method    : E:\Chemstation\1\Data\TIYAS_RPT 2020-03-17 10-04-05\TIYAS_RPT.M
Last changed   : 17-03-2020 10:01:12 by SYSTEM
Analysis Method: E:\CHEMSTATION\1\METHODS\TIYAS_RPT.M
Last changed   : 23-06-2020 12:51:16 by SYSTEM
Additional Info : Peak(s) manually integrated
```

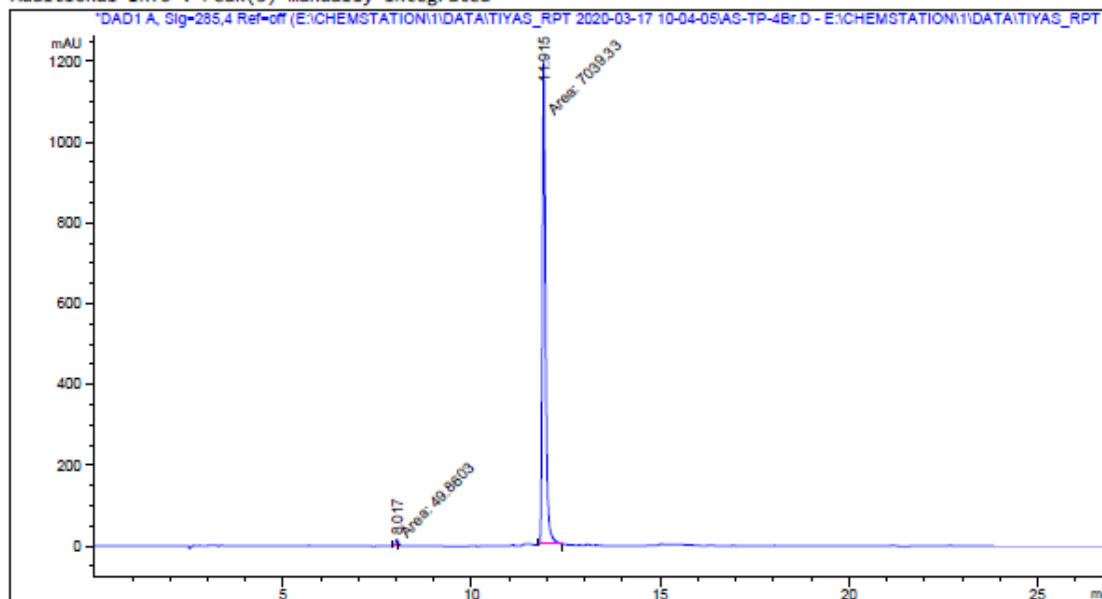

| Peak # | RetTime [min] | Type | Width [min] | Area [mAU*s] | Height [mAU] | Area %  |
|--------|---------------|------|-------------|--------------|--------------|---------|
| 1      | 8.017         | MM   | 0.0634      | 49.86025     | 13.11576     | 0.7033  |
| 2      | 11.915        | MM   | 0.0977      | 7039.33203   | 1200.87622   | 99.2967 |

Totals : 7089.19228 1213.99198

### SPECTRAL DATA OF **5n**

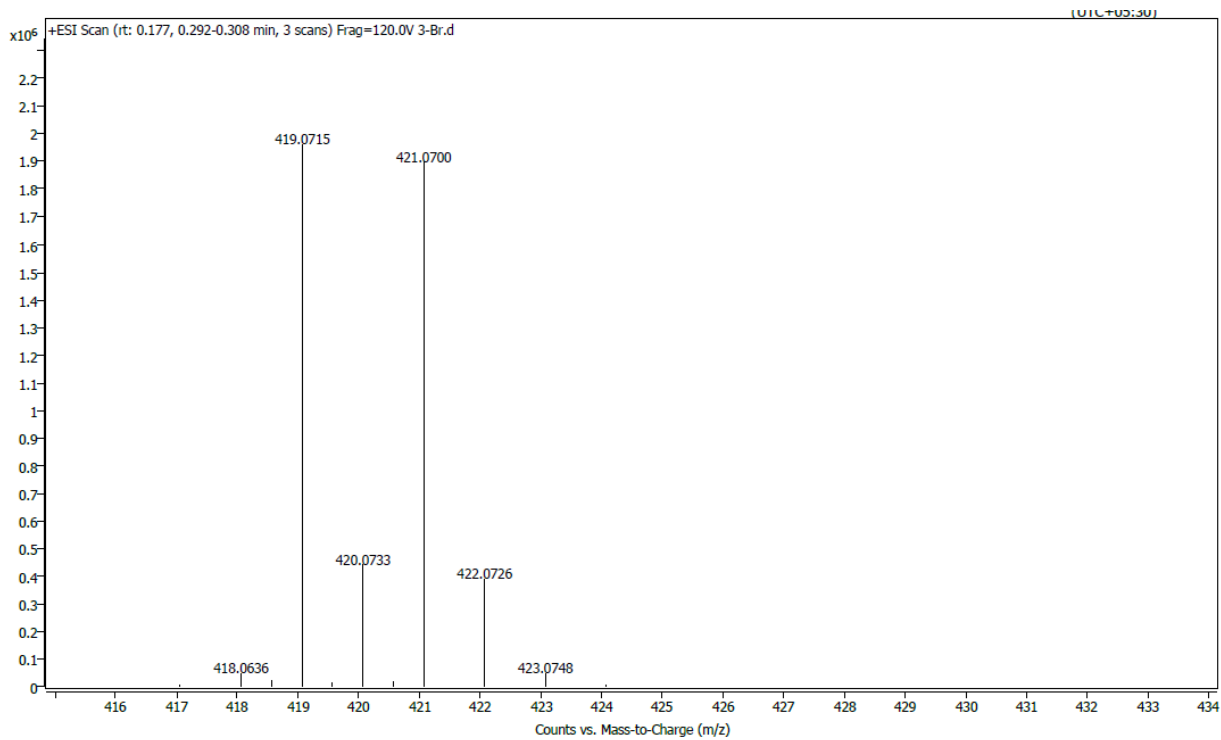

### HRMS Spectrum of **5n**

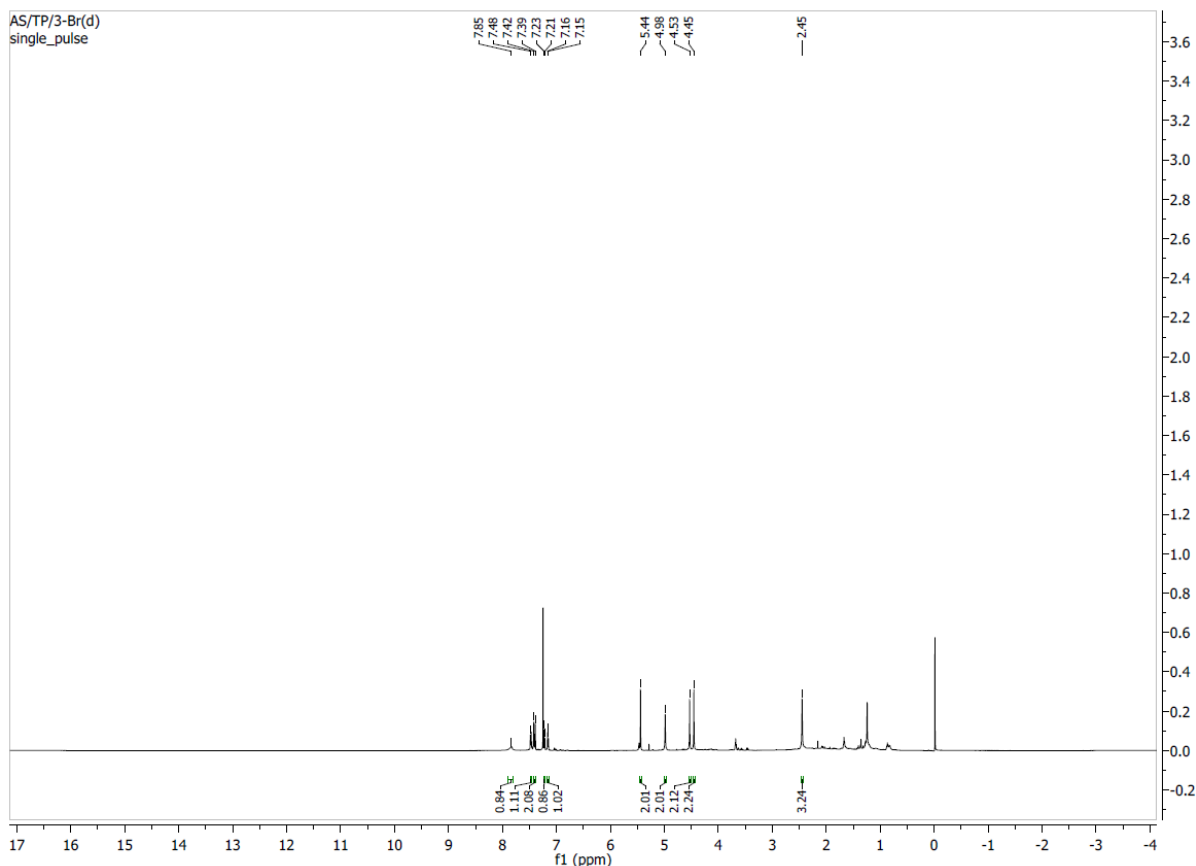

<sup>1</sup>H NMR of **5n** in CDCl<sub>3</sub> at 500MHz

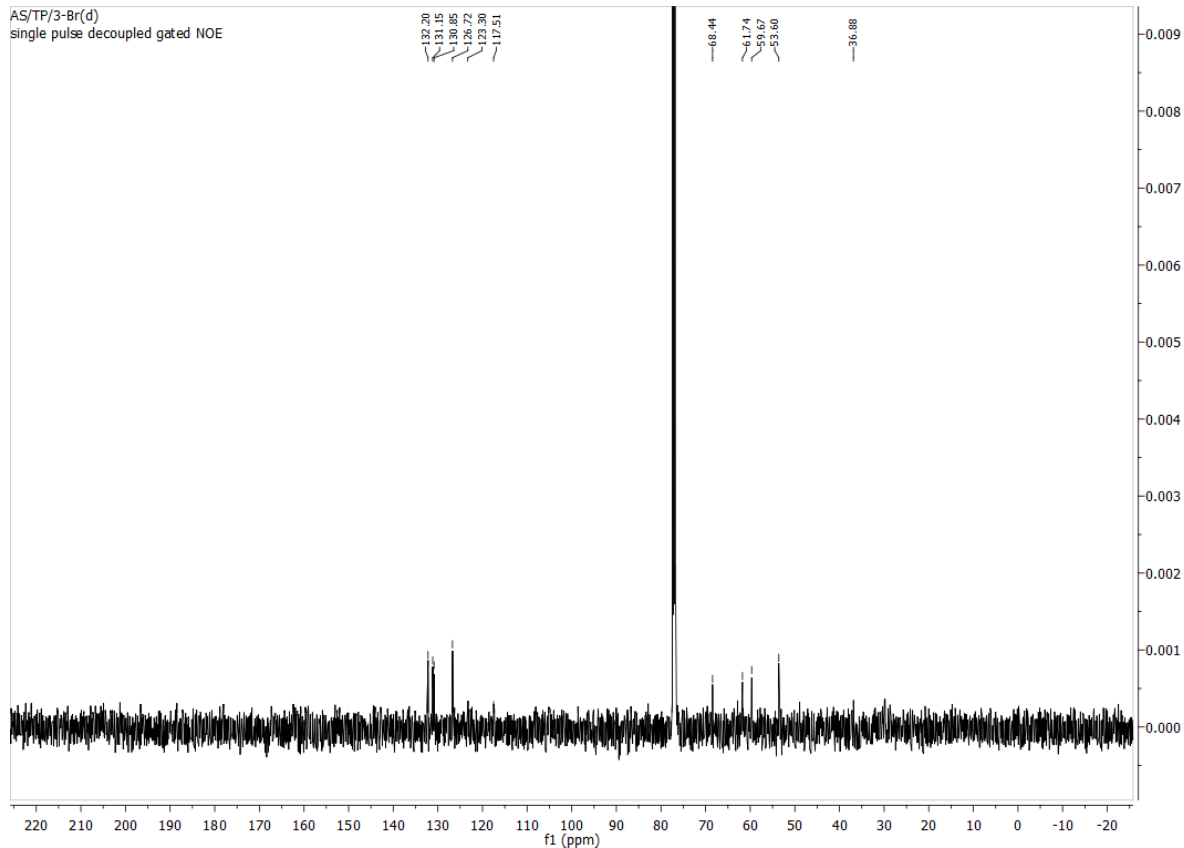

$^{13}\text{C}$  NMR of **5n** in  $\text{CDCl}_3$  at 125MHz

## HPLC Purity Data of **5n**

Data File E:\CHEMSTATION\1\DATA\TIYAS\_RPT 2020-03-17 10-04-05\AS-TP-3Br.D  
Sample Name: AS-TP-3Br

```

=====
Acq. Operator   : SYSTEM                      Seq. Line :    6
Sample Operator : SYSTEM
Acq. Instrument : HPLC                      Location  : P2-B-06
Injection Date  : 17-03-2020 12:27:49        Inj       :    1
                                           Inj Volume: 10.000 µl

Acq. Method    : E:\Chemstation\1\Data\TIYAS_RPT 2020-03-17 10-04-05\TIYAS_RPT.M
Last changed   : 17-03-2020 10:01:12 by SYSTEM
Analysis Method : E:\CHEMSTATION\1\METHODS\TIYAS_RPT.M
Last changed   : 23-06-2020 12:51:16 by SYSTEM
Additional Info : Peak(s) manually integrated
  
```

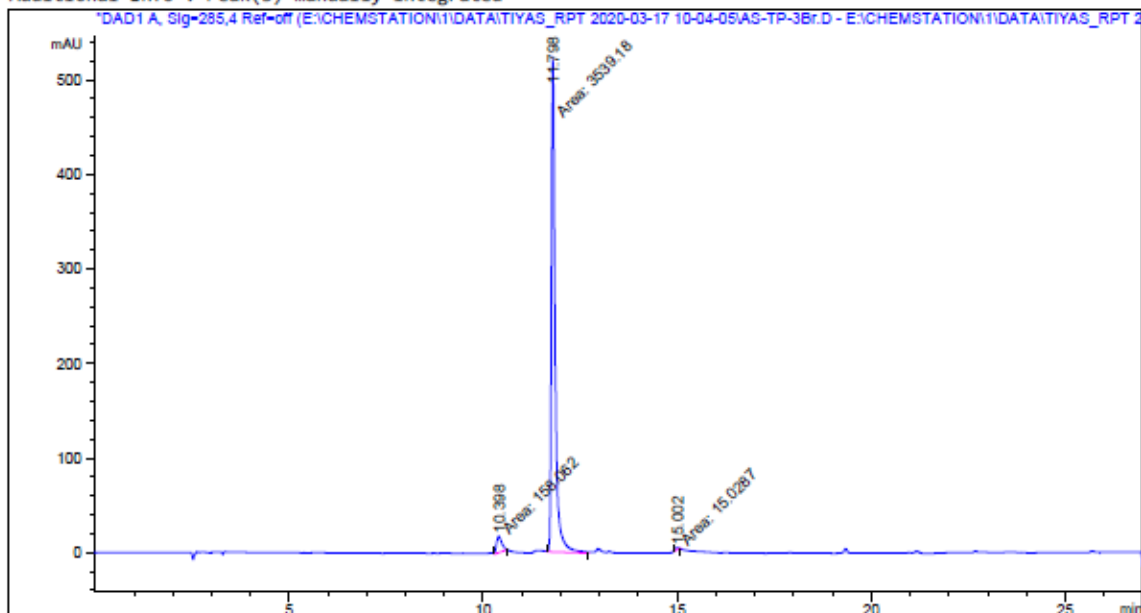

| Peak # | RetTime [min] | Type | Width [min] | Area [mAU*s] | Height [mAU] | Area %  |
|--------|---------------|------|-------------|--------------|--------------|---------|
| 1      | 10.398        | MM   | 0.1536      | 158.06219    | 17.14530     | 4.2578  |
| 2      | 11.798        | MM   | 0.1130      | 3539.17969   | 521.87903    | 95.3373 |
| 3      | 15.002        | MM   | 0.1190      | 15.02869     | 2.10459      | 0.4048  |

Totals : 3712.27057 541.12892

## SPECTRAL DATA OF 5o

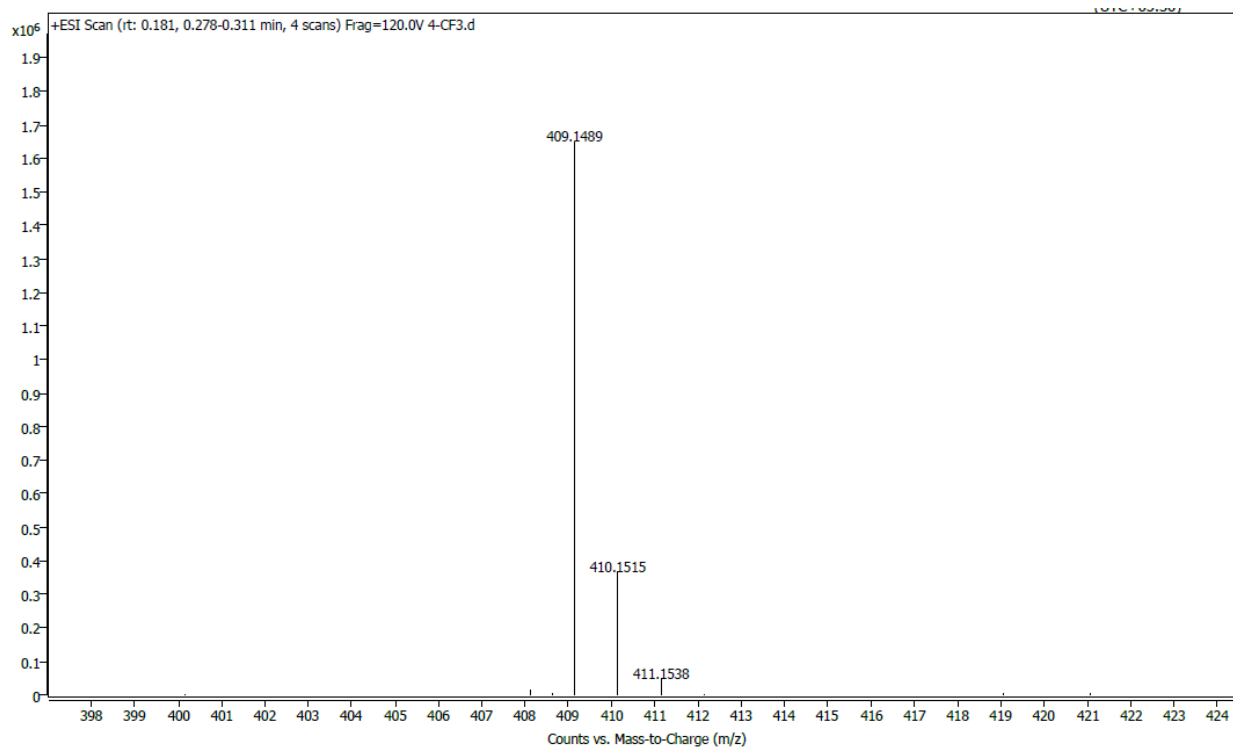

HRMS Spectrum of 5o

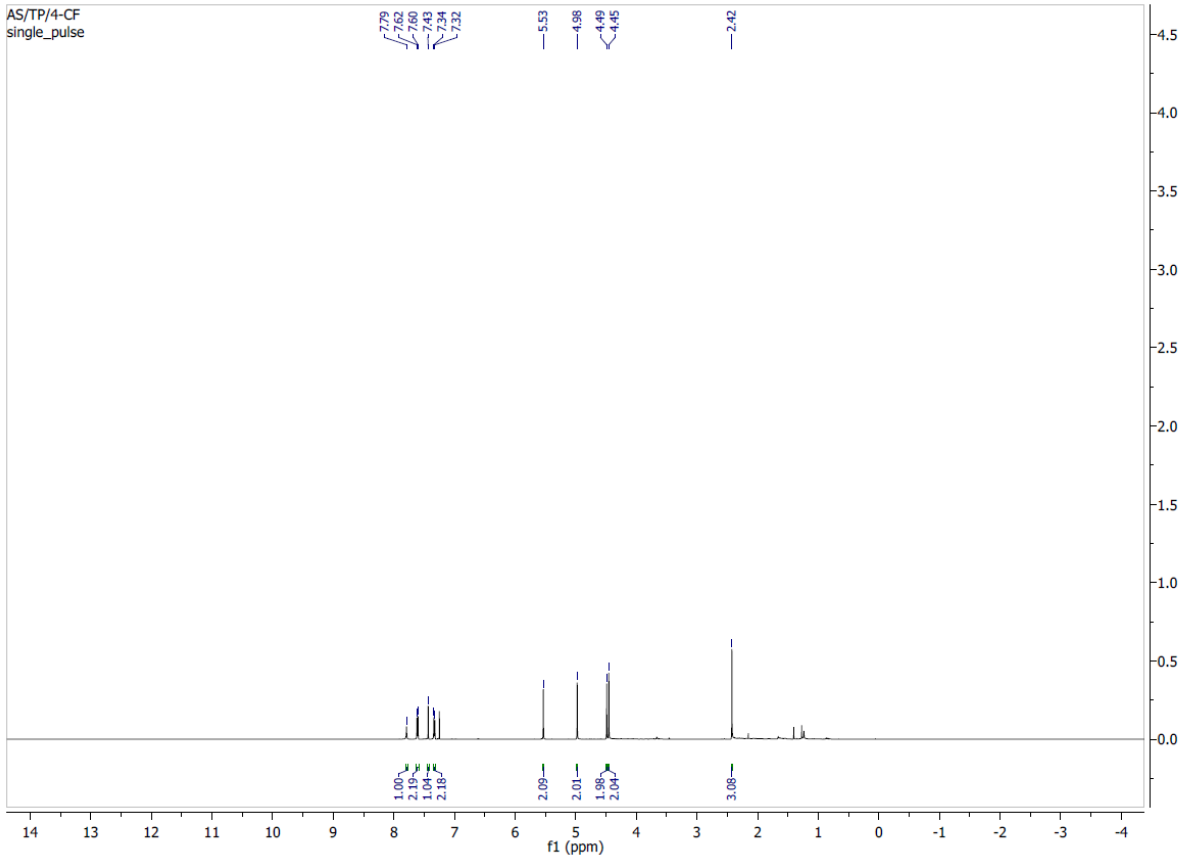

$^1\text{H}$  NMR of **5o** in  $\text{CDCl}_3$  at 500MHz



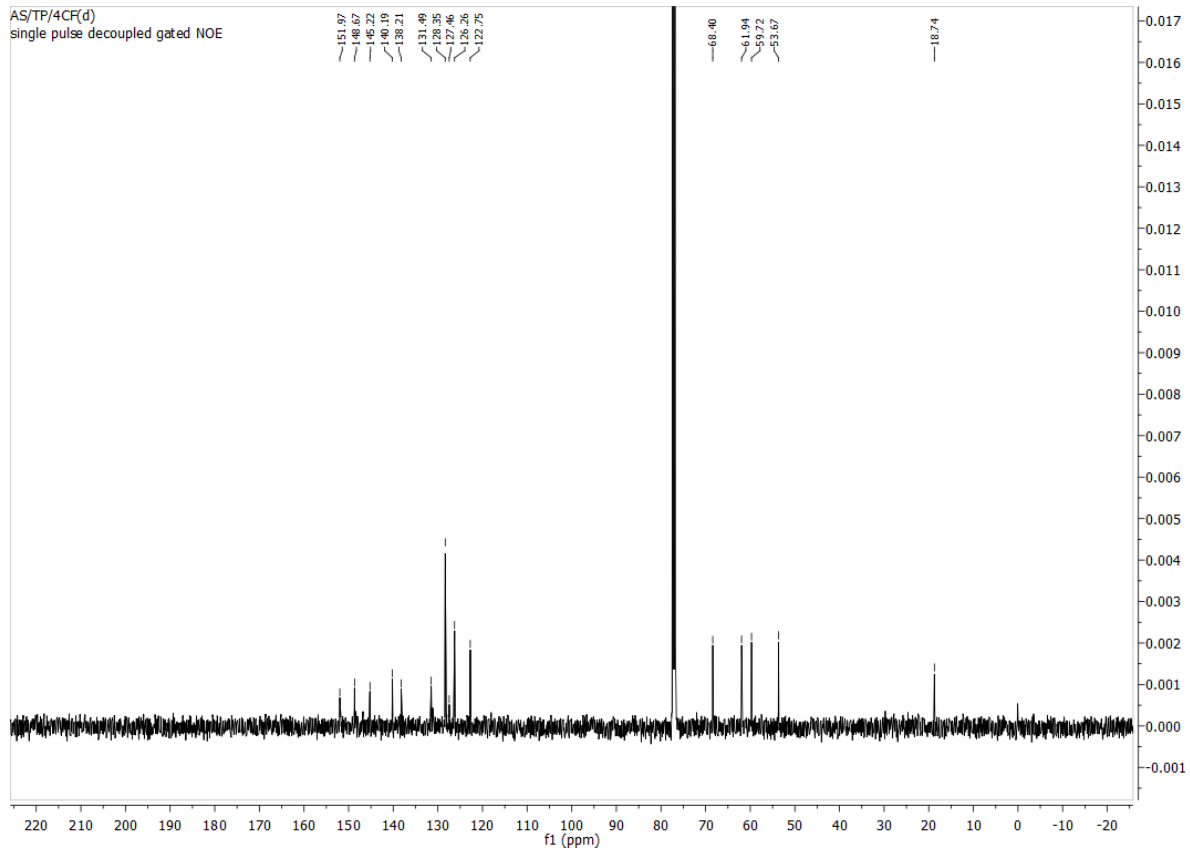

$^{13}\text{C}$  NMR of **5o** in  $\text{CDCl}_3$  at 125MHz

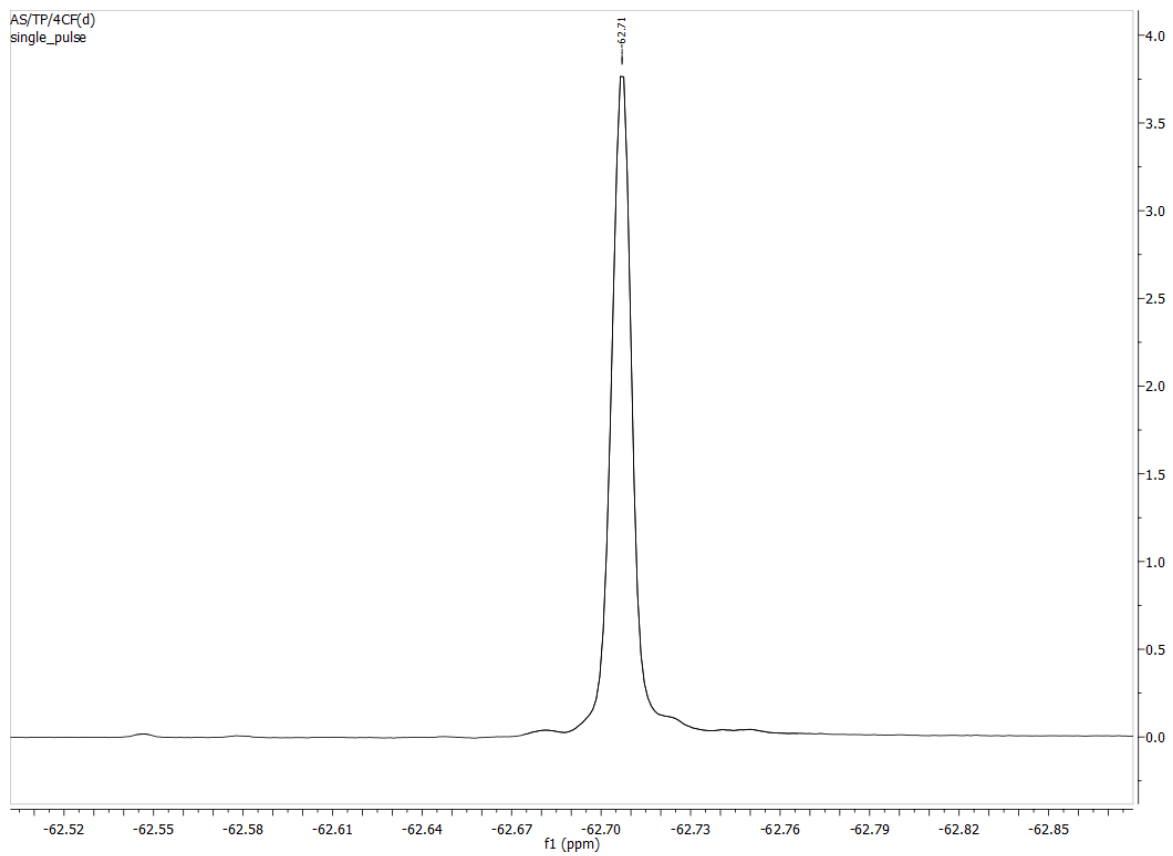

$^{19}\text{F}$  NMR of **5o** in  $\text{CDCl}_3$  at 470MHz

# HPLC Purity Data of 5o

Data File E:\CHEMSTATION\1\DATA\TIYAS\_RPT 2020-03-17 14-08-34\AS-TP-4CF3.D  
 Sample Name: AS-TP-4CF3

```

=====
Acq. Operator   : SYSTEM                      Seq. Line :    2
Sample Operator : SYSTEM
Acq. Instrument : HPLC                      Location  : P2-B-10
Injection Date  : 17-03-2020 14:38:25       Inj       :    1
                                           Inj Volume: 10.000 µl

Acq. Method     : E:\Chemstation\1\Data\TIYAS_RPT 2020-03-17 14-08-34\TIYAS_RPT.M
Last changed    : 17-03-2020 10:01:12 by SYSTEM
Analysis Method : E:\Chemstation\1\Methods\AshimaFA_C-18_PREP.M
Last changed    : 23-06-2020 11:45:48 by SYSTEM
                 (modified after loading)

Additional Info : Peak(s) manually integrated
=====
  
```

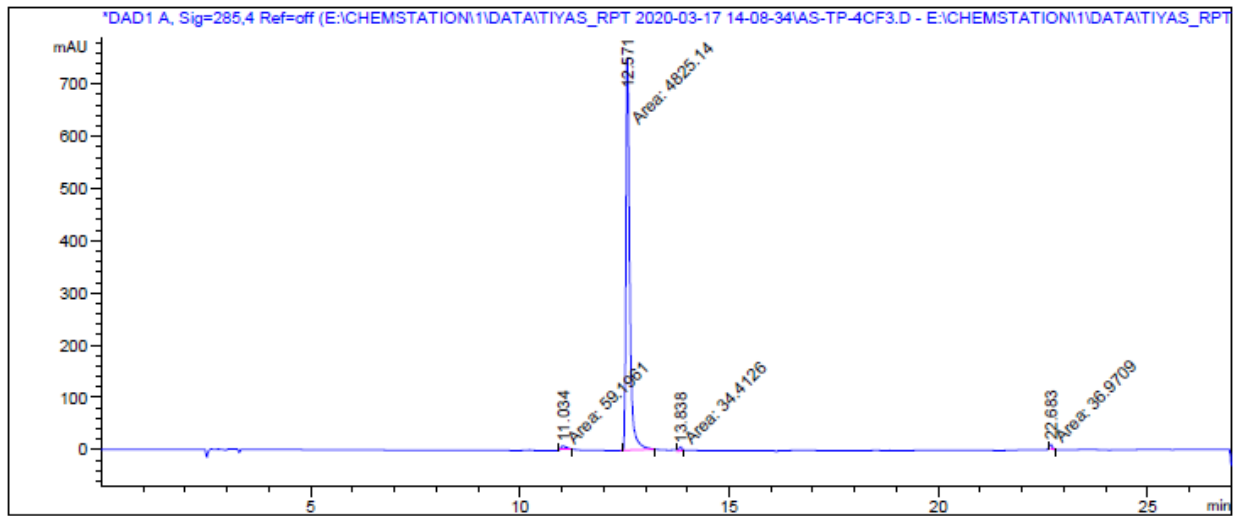

| Peak # | RetTime [min] | Type | Width [min] | Area [mAU*s] | Height [mAU] | Area %  |
|--------|---------------|------|-------------|--------------|--------------|---------|
| 1      | 11.034        | MM   | 0.1571      | 59.19608     | 6.28135      | 1.1945  |
| 2      | 12.571        | MM   | 0.1067      | 4825.13770   | 753.77130    | 97.3651 |
| 3      | 13.838        | MM   | 0.0903      | 34.41263     | 6.35487      | 0.6944  |
| 4      | 22.683        | MM   | 0.0753      | 36.97089     | 8.17996      | 0.7460  |

Totals : 4955.71730 774.58748

# SPECTRAL DATA OF 5p

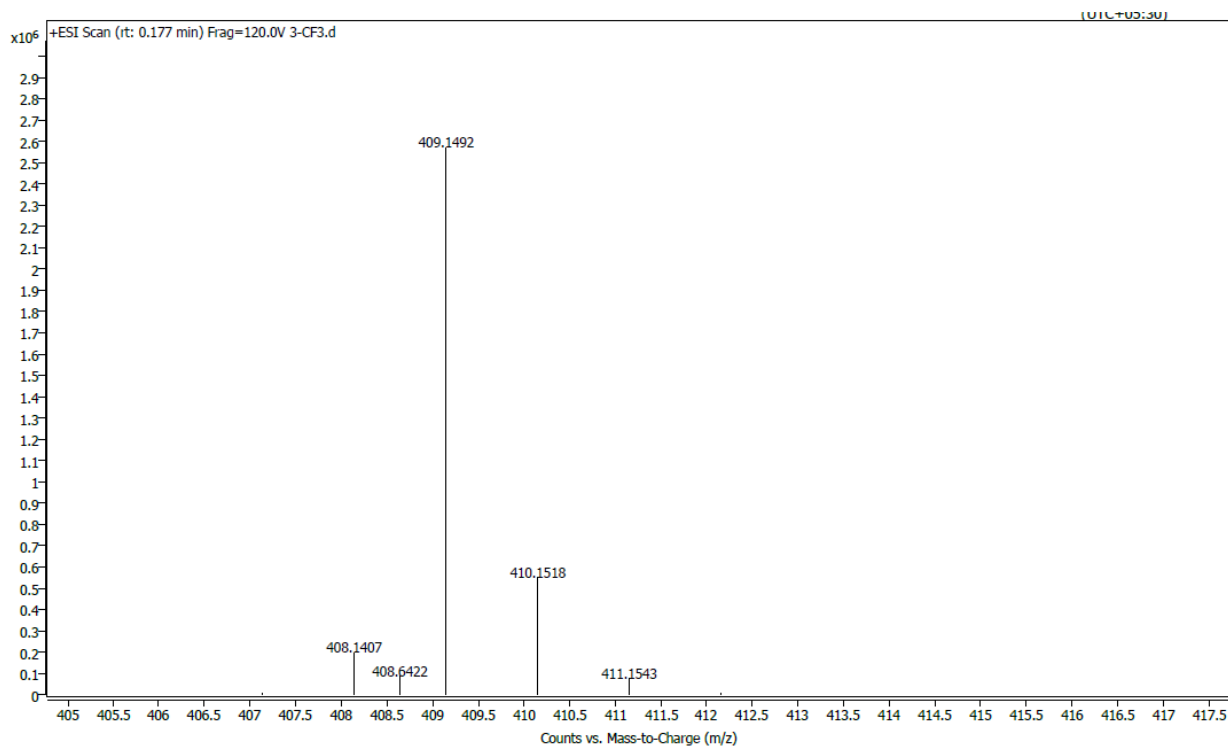

## HRMS Spectrum of 5p

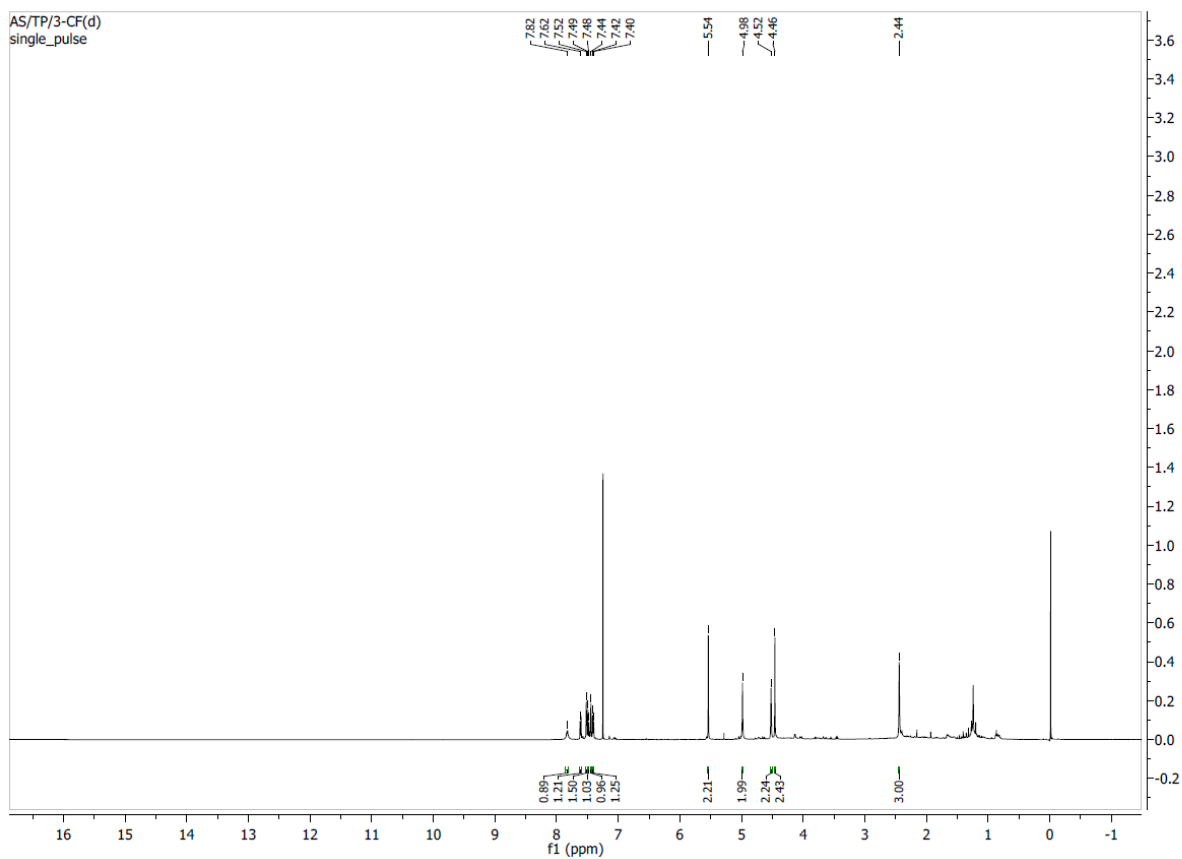

<sup>1</sup>H NMR of 5p in CDCl<sub>3</sub> at 500MHz

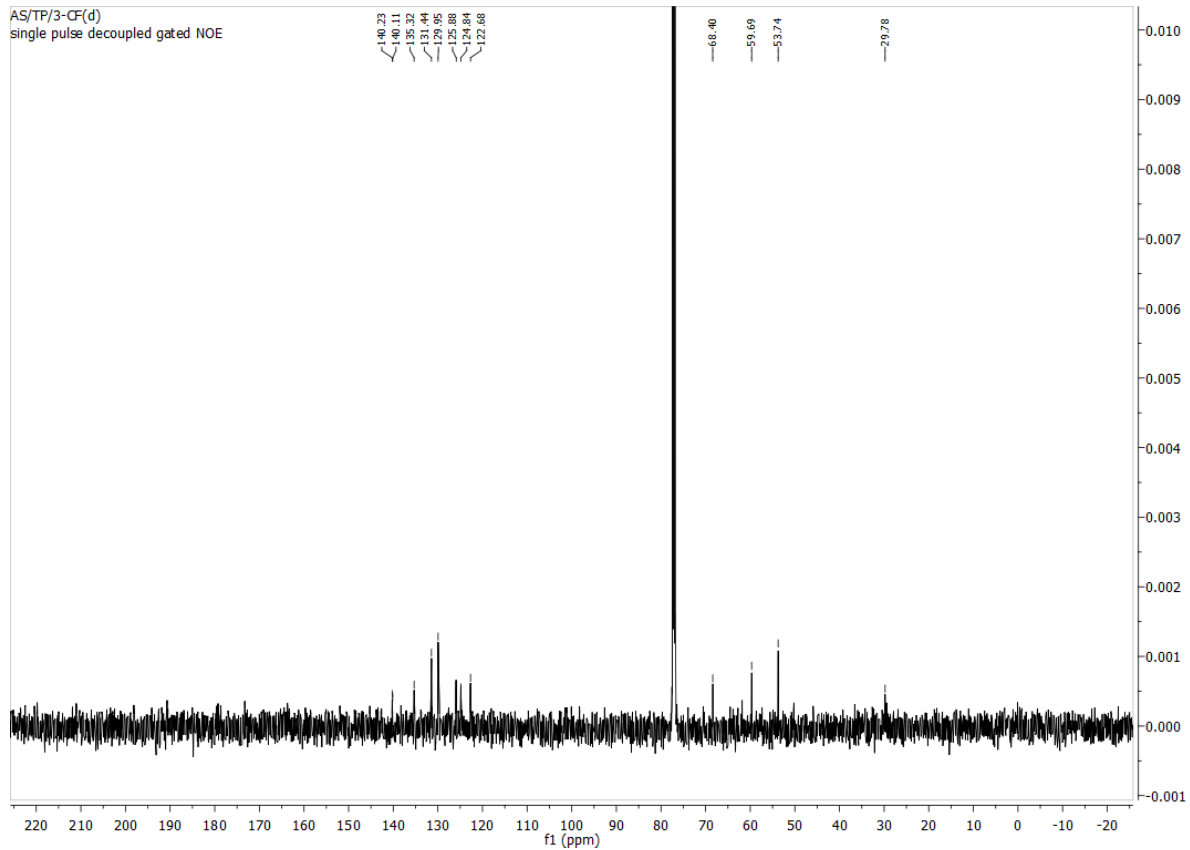

$^{13}\text{C}$  NMR of **5p** in  $\text{CDCl}_3$  at 125MHz

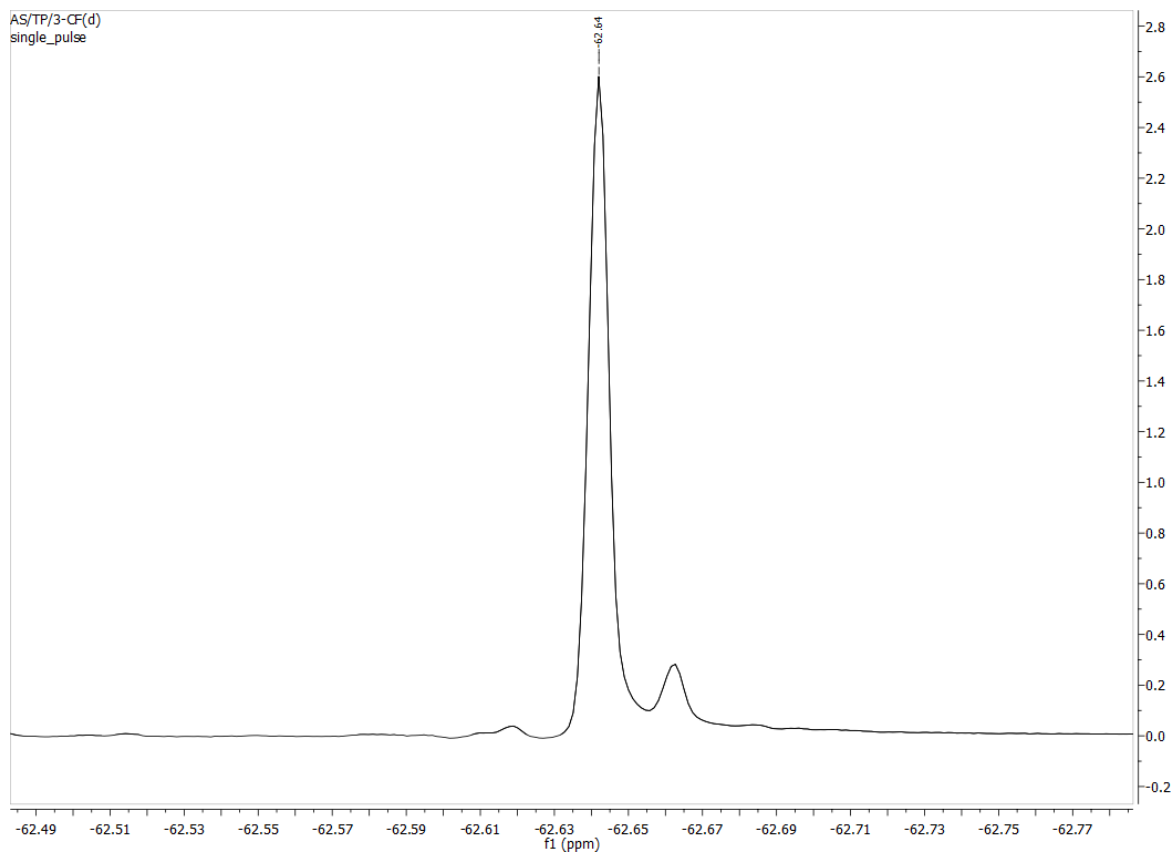

$^{19}\text{F}$  NMR of **5p** in  $\text{CDCl}_3$  at 470MHz

HPLC Purity Data of **5p**

```

=====
Acq. Operator   : SYSTEM                      Seq. Line :    1
Sample Operator : SYSTEM
Acq. Instrument : HPLC                      Location  : P2-D-03
Injection Date  : 24-06-2020 12:46:28       Inj       :    1
                                           Inj Volume: 10.000 µl
Different Inj Volume from Sample Entry! Actual Inj Volume : 4.000 µl
Acq. Method     : E:\Chemstation\1\Data\TIYAS_23062020_PREP 2020-06-24 12-45-26\TIYAS_RPT.M
Last changed    : 23-06-2020 12:51:16 by SYSTEM
Analysis Method : E:\CHEMSTATION\1\METHODS\AshimaFA_C-18_PREP.M
Last changed    : 23-06-2020 15:02:47 by SYSTEM
Sample Info     : AS-AT-TP-8
  
```

Additional Info : Peak(s) manually integrated

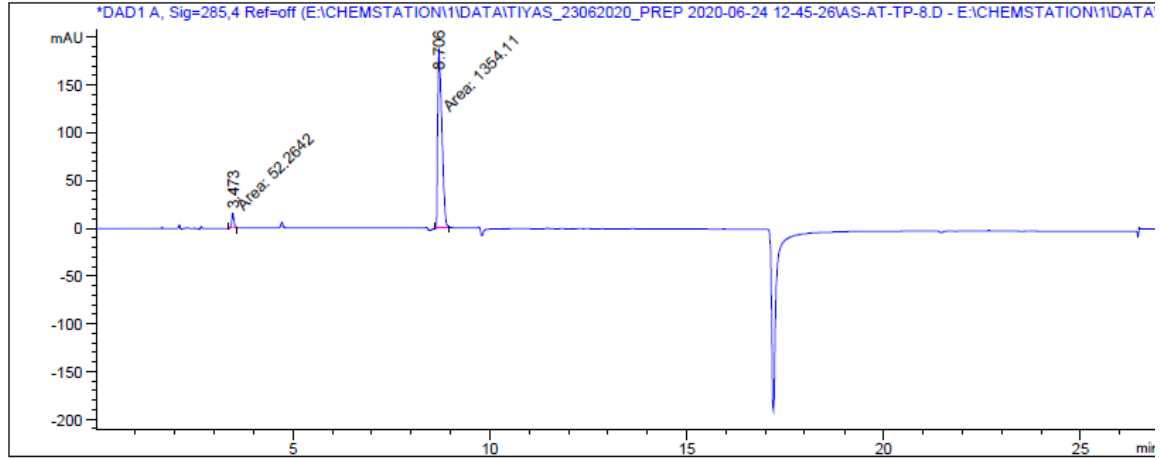

| Peak # | RetTime [min] | Type | Width [min] | Area [mAU*s] | Height [mAU] | Area %  |
|--------|---------------|------|-------------|--------------|--------------|---------|
| 1      | 3.473         | MM   | 0.0593      | 52.26423     | 14.68460     | 3.7162  |
| 2      | 8.706         | MM   | 0.1199      | 1354.10974   | 188.24948    | 96.2838 |

Totals : 1406.37397 202.93408

### SPECTRAL DATA OF 5q

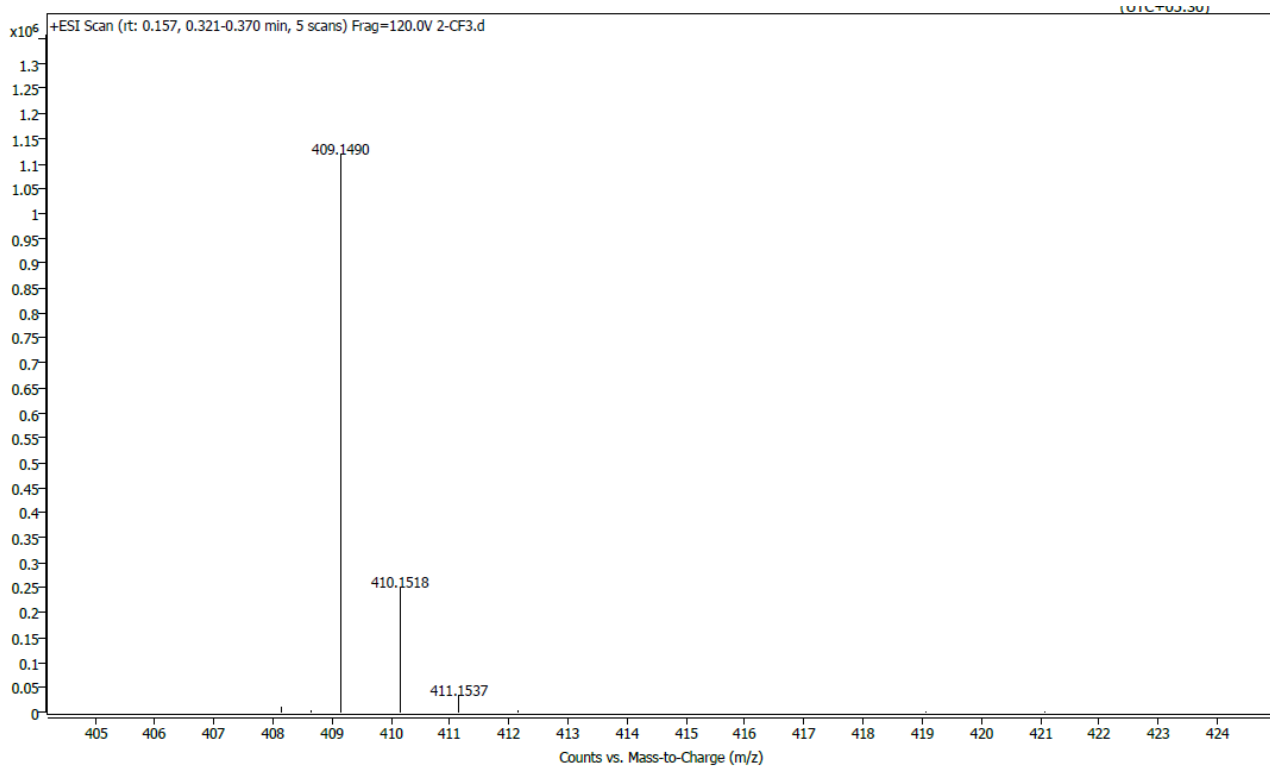

### HRMS Spectrum of **5q**

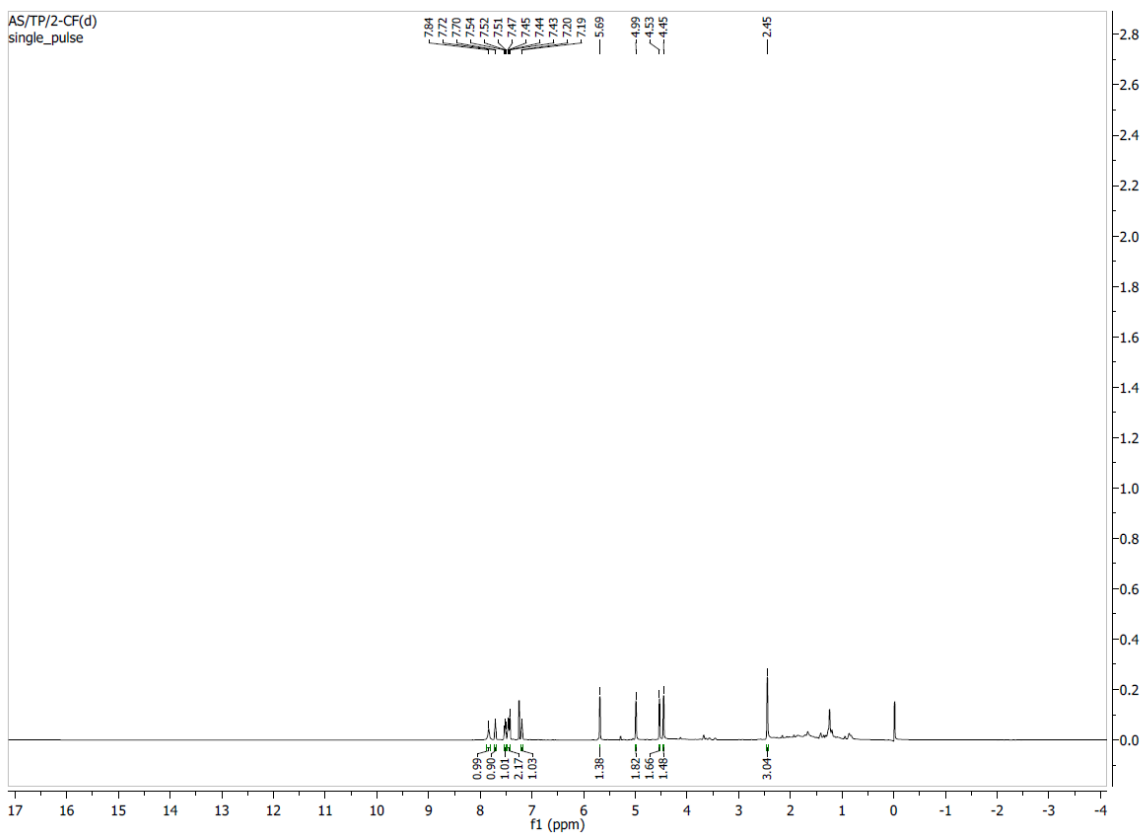

<sup>1</sup>H NMR of **5q** in CDCl<sub>3</sub> at 500MHz

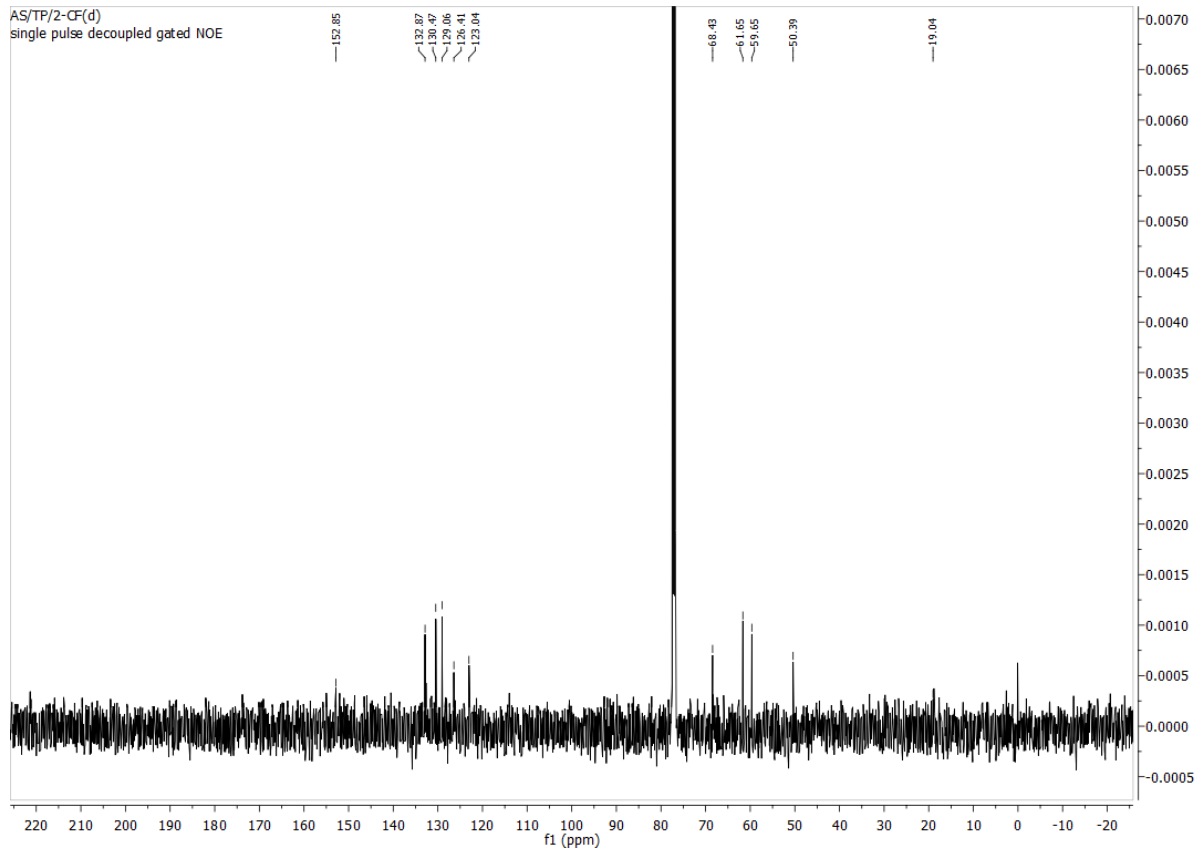

$^{13}\text{C}$  NMR of **5q** in  $\text{CDCl}_3$  at 125MHz

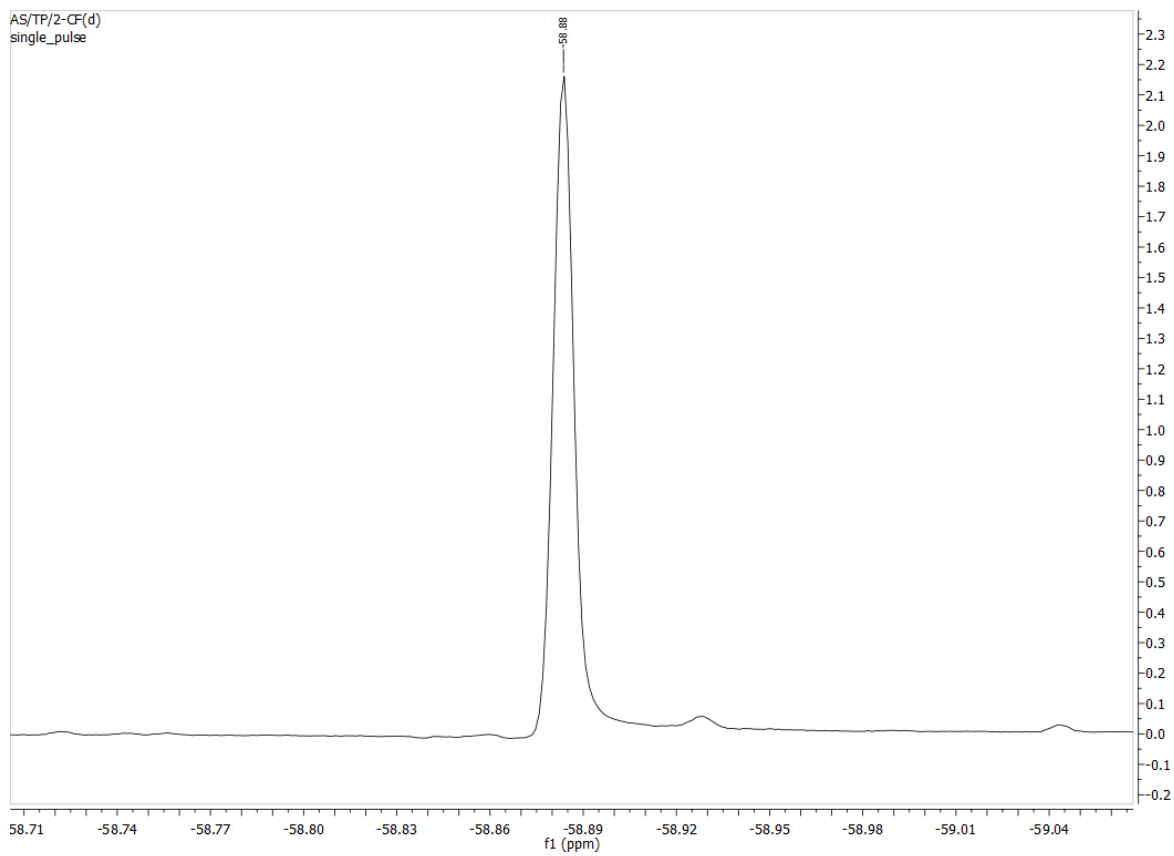

$^{19}\text{F}$  NMR of **5q** in  $\text{CDCl}_3$  at 470MHz

# HPLC Purity Data of 5q

Data File E:\CHEMSTATION\1\DATA\TIYAS\_RPT 2020-03-17 10-04-05\AS-TP-2CF3.D  
 Sample Name: AS-TP-2CF3

```

=====
Acq. Operator   : SYSTEM                      Seq. Line :    2
Sample Operator : SYSTEM
Acq. Instrument : HPLC                      Location  : P2-B-02
Injection Date  : 17-03-2020 10:33:53        Inj       :    1
                                           Inj Volume: 10.000 µl

Acq. Method     : E:\Chemstation\1\Data\TIYAS_RPT 2020-03-17 10-04-05\TIYAS_RPT.M
Last changed    : 17-03-2020 10:01:12 by SYSTEM
Analysis Method : E:\Chemstation\1\Methods\AshimaFA_C-18_PREP.M
Last changed    : 23-06-2020 11:45:48 by SYSTEM
                 (modified after loading)

Additional Info : Peak(s) manually integrated
=====
  
```

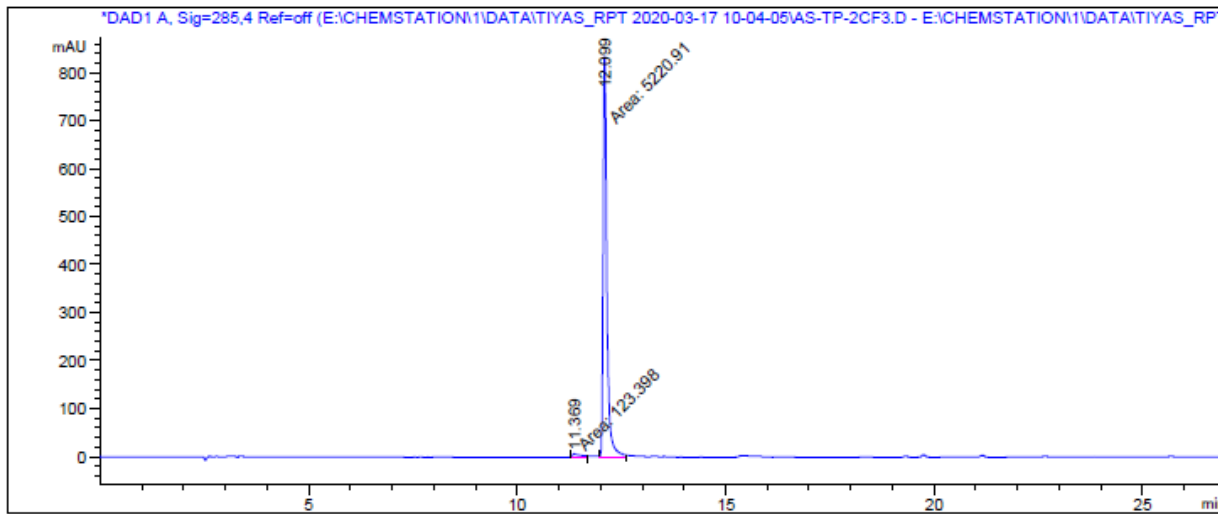

| Peak # | RetTime [min] | Type | Width [min] | Area [mAU*s] | Height [mAU] | Area %  |
|--------|---------------|------|-------------|--------------|--------------|---------|
| 1      | 11.369        | MM   | 0.2720      | 123.39763    | 7.56185      | 2.3090  |
| 2      | 12.099        | MM   | 0.1041      | 5220.90869   | 836.01648    | 97.6910 |

Totals : 5344.30632 843.57833



**Metal Chelation UV spectrum of Compounds 5c, 5d, 5h, 5i, 5n, 5q against Fe, Cu, Zn, Al.**

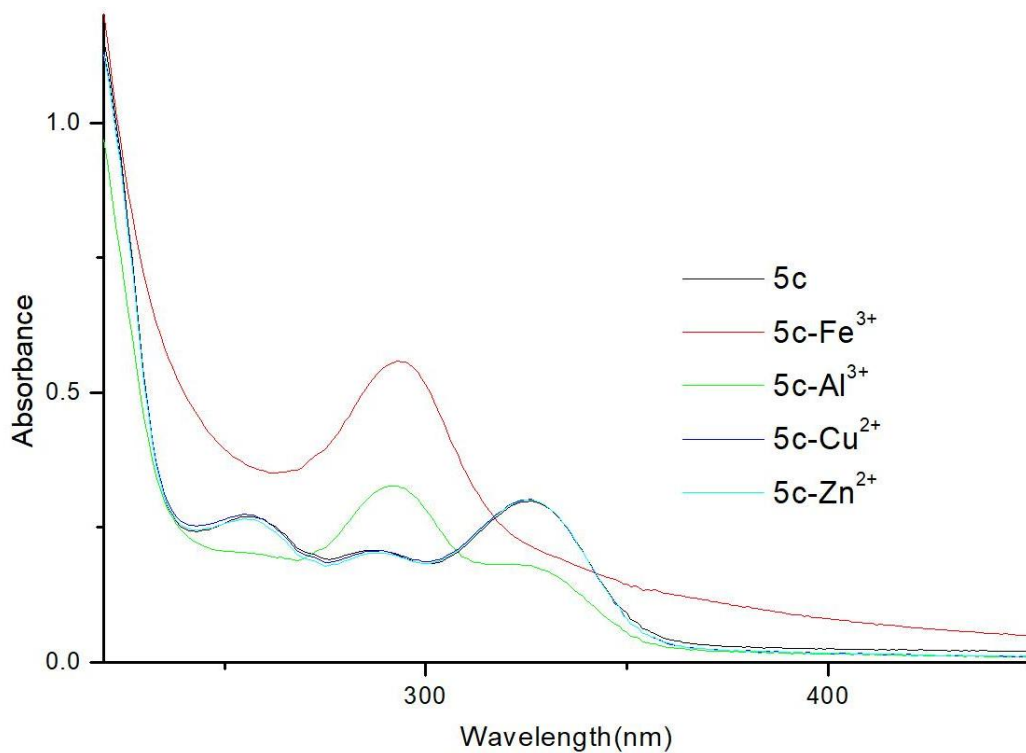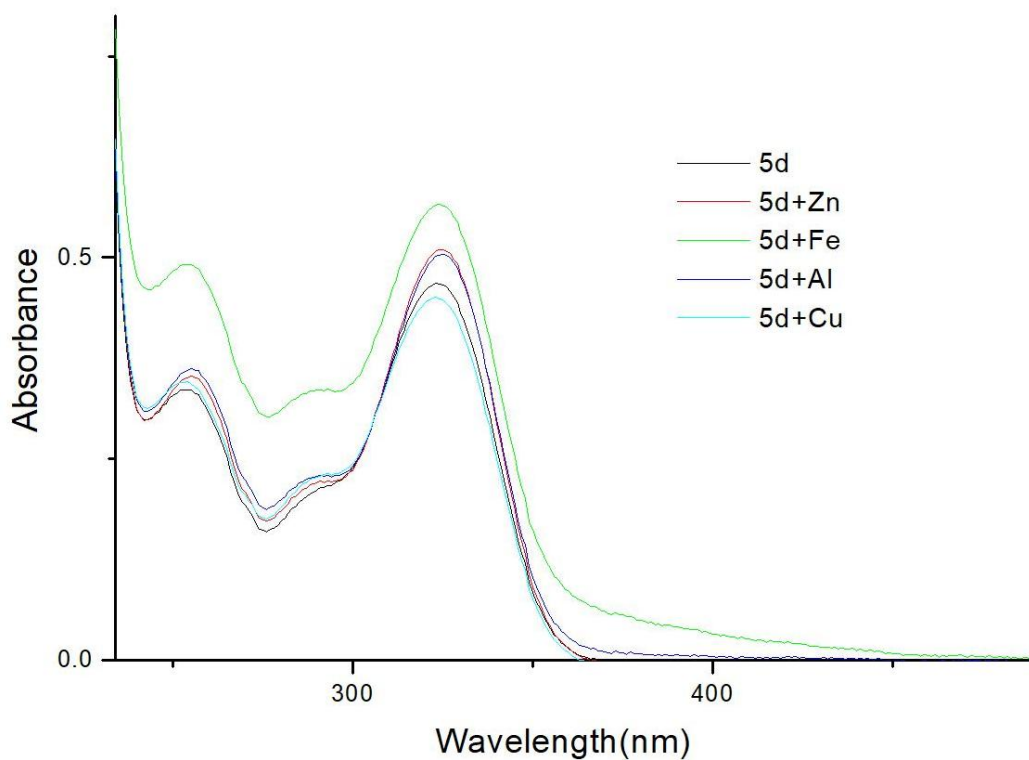



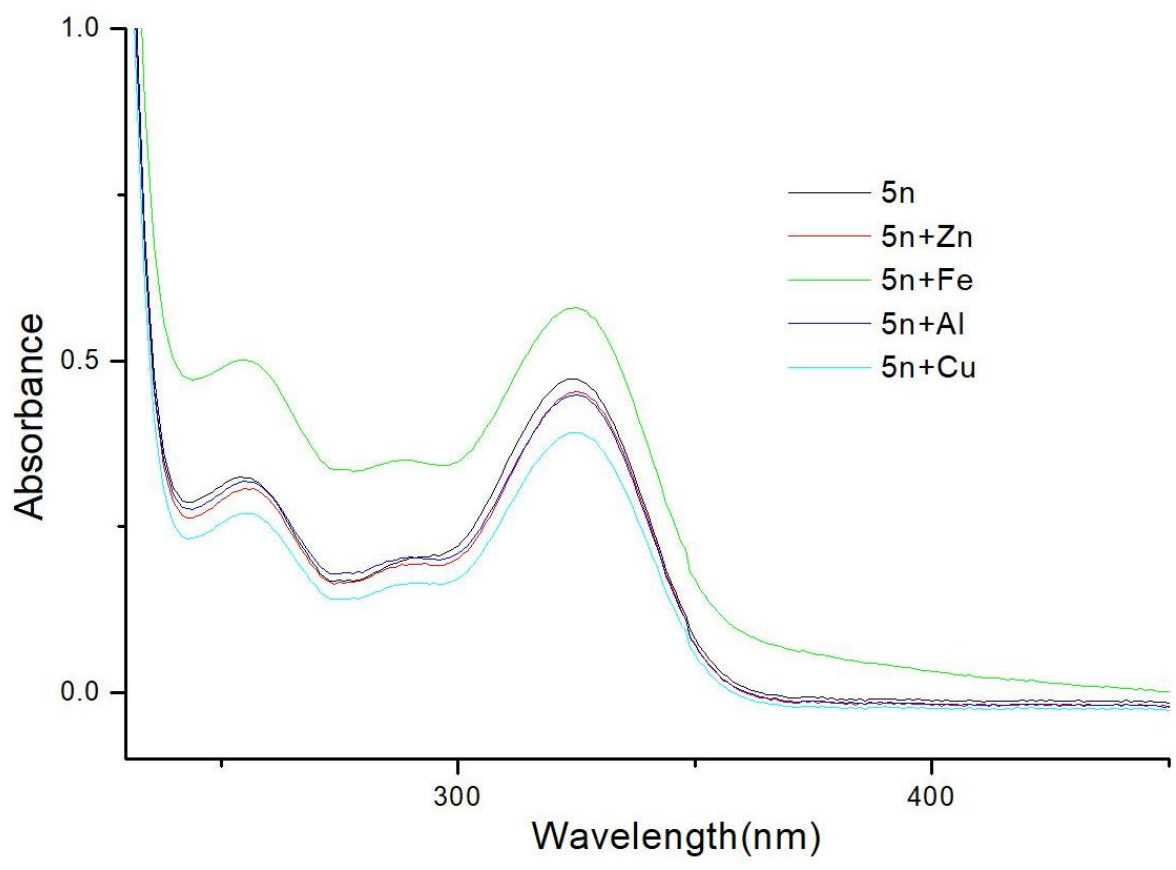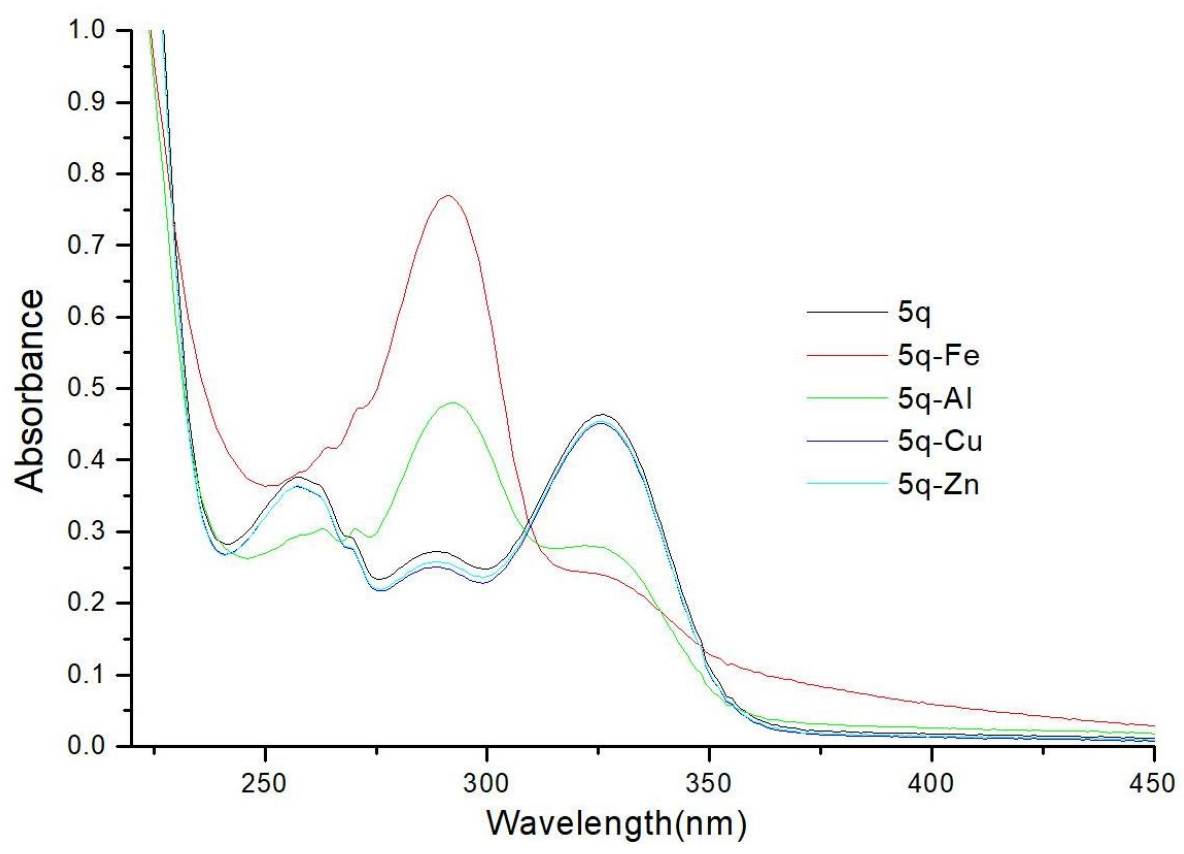

Supplement: RA-010-D0RA04942E-s001.pdf [file RA-010-D0RA04942E-s001.pdf]
